# Supplementary material for: Reactions of α-haloacroleins with azides: highly regioselective synthesis of formyl triazoles
Source: Royal Society of Chemistry journal article supplement (doi:10.1039/c9gc01129c), 2019-01-01

**Supporting Information for**

**Reactions of  $\alpha$ -Haloacroleins with Azides: Highly Regioselective  
Synthesis of Formyl Triazoles**

Dongsheng Zhang, Yingzhu Fan, Zhongliang Yan, Yi Nie, Xingquan Xiong, and  
Lizhu Gao\*

*College of Materials Science & Engineering, Huaqiao University, Xiamen 361021,  
China*

*E-mail: lizhugao@hqu.edu.cn*

**Table of Contents:**

|                                                                                  |            |
|----------------------------------------------------------------------------------|------------|
| <b>1. General Information</b>                                                    | <b>S2</b>  |
| <b>2. Preparation of <math>\alpha</math>-Bromoacroleins</b>                      | <b>S2</b>  |
| <b>3. Preparation of Organic Azides</b>                                          | <b>S3</b>  |
| <b>4. General Procedure for Preparation of 4-Formyl-1,2,3-Triazoles</b>          | <b>S3</b>  |
| <b>5. Synthesis and Characterization of 4-Formyl-1,2,3-Triazoles</b>             | <b>S4</b>  |
| <b>6. Synthetic Transformations of 4-Formyl-1,2,3-Triazole</b>                   | <b>S26</b> |
| <b>7. <math>^1\text{H}</math> NMR and <math>^{13}\text{C}</math> NMR Spectra</b> | <b>S32</b> |

## 1. General Information

Thin-layer chromatography (TLC) was performed on Merck silica gel 60 F254. Flash chromatography was performed using E. Merck silica gel (40-60  $\mu\text{m}$  partical size).  $^1\text{H}$  and  $^{13}\text{C}$  NMR spectra were recorded on a Bruker AVIII-500M spectrometers at 500 and 126 MHz. Chemical shift values are reported in ppm from tetramethylsilane as the internal standard (TMS:  $\delta$  0 for  $^1\text{H}$  and  $\delta$  77.16 for  $^{13}\text{C}$ ). Data are reported as follows: chemical shifts, integration, multiplicity (s = singlet, d = doublet, t = triplet, q = quartet, dd = doublet of doublets, dq = doublet of quartets, m = multiplet), and coupling constants (Hz). Infrared spectra were recorded on Thermo Scientific Nicolet iS50. HRMS were recorded on Agilent 1290 UHPLC/ 6545 Q-TOF mass spectrometer. Commercial grade reagents and solvents were used without further purification except as indicated below. Data for the single crystal structure determination were collected with an Agilent Gemini/Xcalibur X-ray diffractometer equipped with a CCD area Atlas detector and a mirror monochromator by utilizing Cu-K  $\alpha$  radiation ( $\lambda = 1.5418 \text{ \AA}$ ).

## 2. Preparation of $\alpha$ -Bromoacroleins <sup>[1]</sup>

To a stirred solution of acroleins (23.1 mmol) in  $\text{CH}_2\text{Cl}_2$  (35 mL) was added  $\text{Br}_2$  (1.18 mL, 23.1 mmol) over 30 min at  $-78^\circ\text{C}$  under argon. After an additional 30 min at  $-78^\circ\text{C}$ ,  $\text{Et}_3\text{N}$  (3.2 mL, 23.1 mmol) was added and the mixture was warmed to room temperature over 2 h. The reaction was then quenched by the addition of  $\text{H}_2\text{O}$  (40 mL), the layers were separated, and the aqueous layer was extracted with  $\text{CH}_2\text{Cl}_2$  ( $1 \times 40 \text{ mL}$ ). The combined organic layers were washed with a 9:1 mixture of brine and 1 M  $\text{HCl}$  (40 mL), dried ( $\text{Na}_2\text{SO}_4$ ), filtered and concentrated at room temperature. The residue was purified by vacuum distillation or by silica gel chromatography to give the corresponding  $\alpha$ -bromoacroleins.

---

[1] R. H. Baker, S. W. Tinsley, D. Butler, B. Riegel, *J. Am. Chem. Soc.*, **1950**, 72, 393.

## 2-Bromo-3-cyclohexylacrylaldehyde

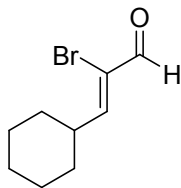

A light yellow oil;  $R_f$  0.20 (ethyl acetate/hexane = 1:20);  $^1\text{H}$  NMR (500 MHz,  $\text{CDCl}_3$ )  $\delta$  9.18 (s, 1H), 6.96 (d,  $J$  = 9.1 Hz, 1H), 2.87 – 2.72 (m, 1H), 1.88 – 1.67 (m, 5H), 1.44 – 1.31 (m, 2H), 1.32 – 1.19 (m, 3H) ppm;  $^{13}\text{C}$  NMR (126 MHz,  $\text{CDCl}_3$ )  $\delta$  186.5, 160.0, 126.8, 41.2, 30.8, 25.8, 25.3 ppm; IR (neat) 2917, 2849, 1462, 1260, 1081, 1020, 800  $\text{cm}^{-1}$ ; HRMS (APCI) exact mass calcd. for  $\text{C}_9\text{H}_{13}\text{BrO}$ :  $m/z$  217.0223 ( $[\text{M} + \text{H}]^+$ ), found:  $m/z$  217.0224 ( $[\text{M} + \text{H}]^+$ ).

## 3. Preparation of Alkyl Azides <sup>[2]</sup>

To a solution of  $\text{NaN}_3$  (0.715 g, 11 mmol) in DMSO (22 mL) was added alkyl bromide (10 mmol) at room temperature, then the reaction mixture was stirred at 60 °C until alkyl bromide had been consumed. The reaction was quenched with  $\text{H}_2\text{O}$  (50 mL) and stirred until it cooled to room temperature. The mixture was extracted with  $\text{Et}_2\text{O}$  ( $3 \times 30$  mL), and  $\text{Et}_2\text{O}$  extracts were washed with  $\text{H}_2\text{O}$  ( $2 \times 50$  mL) and brine (50 mL). The organic layer was dried over  $\text{MgSO}_4$ . The solvent was removed under reduced pressure and the residue was purified by short column chromatography on silica gel with hexane/dichloromethane (5:1) as the eluent to give the corresponding organic azide as a colorless oil.

## 4. General Procedure for Preparation of 4-Formyl-1,2,3-Triazoles

To a solution of  $\alpha$ -bromoacrolein (0.20 mmol) in 200  $\mu\text{L}$  of solvent was added organic azide (0.13 mmol) at room temperature. The reaction mixture was stirred at same temperature for 36 h, then triethyl amine (21  $\mu\text{L}$ , 0.15 mmol) was added. 5 Min later, solvent was removed under reduced pressure, and the residue was purified by silica gel chromatography to afford the desired

[2] S. Alvarez, M. Alvarez, *Synthesis*, **1997**, 4, 413.

corresponding 4-Formyl-1,2,3- Triazoles.

## 5. Synthesis and Characterization of 4-Formyl-1,2,3-Triazoles

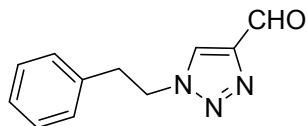

### 1-Phenethyl-1H-1,2,3-triazole-4-carbaldehyde (1)

The compound was prepared according to general procedure with  $\alpha$ -bromoacrolein (0.2 mmol, 27.0 mg) and (2-azidoethyl) benzene (0.13 mmol, 19.1 mg) in 200  $\mu$ L of DMSO/H<sub>2</sub>O (7:3 vol/vol) over a course of 36 h at room temperature. The crude material was purified by column chromatography on silica gel (eluting with ethyl acetate/hexane = 1:1) to give the desired product [95% yield (25.0 mg)] as a white solid (mp: 79-80 °C).

$R_f$  0.20 (ethyl acetate/hexane = 1:1); <sup>1</sup>H NMR (500 MHz, CDCl<sub>3</sub>)  $\delta$  10.08 (s, 1H), 7.85 (s, 1H), 7.35–7.20 (m, 3H), 7.11–7.03 (m, 2H), 4.68 (t,  $J$  = 7.1 Hz, 2H), 3.25 (t,  $J$  = 7.1 Hz, 2H) ppm; <sup>13</sup>C NMR (126 MHz, CDCl<sub>3</sub>)  $\delta$  185.0, 147.4, 136.3, 129.0, 128.6, 127.4, 125.7, 52.1, 36.4 ppm; IR (neat) 3118, 2951, 2855, 1694, 1533, 1459, 1163, 1049, 760, 703 cm<sup>-1</sup>; HRMS (ESI) exact mass calcd. for C<sub>11</sub>H<sub>11</sub>N<sub>3</sub>O:  $m/z$  202.0975 ([M + H]<sup>+</sup>), found:  $m/z$  202.0977 ([M + H]<sup>+</sup>).

Gram-scale reaction:

To a stirred solution of  $\alpha$ -bromoacrolein (1.22 g, 9 mmol) in 10 mL of DMSO/H<sub>2</sub>O (7:3 vol/vol) was added phenethyl azide (1.03 g, 7 mmol) dropwise at 0 °C over 20 min. Then the mixture was slowly warmed to room temperature and stirred for another 36 h. The reaction mixture was extracted with ether (3  $\times$  20 mL), and combined organic phase was washed with brine (2  $\times$  5 mL). Then it was condensed under reduced pressure and the resulting solid was washed with hot hexane (3 mL). The product was got in 89% yield (1.256 g) and pure enough for analysis.

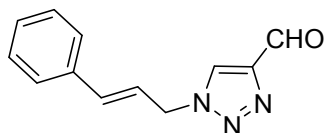

### 1-Cinnamyl-1H-1,2,3-triazole-4-carbaldehyde (2)

The compound was prepared according to general procedure with  $\alpha$ -bromoacrolein (0.2 mmol, 27.0 mg) and (3-azidoprop-1-en-1-yl) benzene (0.13 mmol, 20.7 mg) in 200  $\mu$ L of DMSO/H<sub>2</sub>O (7:3 vol/vol) over a course of 36 h at room temperature. The crude material was purified by column chromatography on silica gel (eluting with ethyl acetate/hexane = 1:1) to give the desired product [88% yield (24.5 mg)] as a white solid (mp: 74-76 °C).

$R_f$  0.20 (ethyl acetate/hexane = 1:1); <sup>1</sup>H NMR (500 MHz, CDCl<sub>3</sub>)  $\delta$  10.14 (s, 1H), 8.20 (s, 1H), 7.43 – 7.25 (m, 5H), 6.73 (d,  $J$  = 15.7, 1.3 Hz, 1H), 6.34 (dt,  $J$  = 15.8, 6.8 Hz, 1H), 5.20 (d,  $J$  = 6.8, 1.4 Hz, 2H) ppm; <sup>13</sup>C NMR (126 MHz, CDCl<sub>3</sub>)  $\delta$  185.0, 148.0, 133.3, 133.2, 130.8, 129.5, 128.0, 128.0, 127.9, 127.1, 127.0, 125.4, 125.3, 54.8 ppm; IR (neat) 3024, 2926, 2838, 1691, 1533, 1239, 1166, 1048, 969, 748, 696 cm<sup>-1</sup>; HRMS (ESI) exact mass calcd. for C<sub>12</sub>H<sub>11</sub>N<sub>3</sub>O:  $m/z$  214.0975 ([M + H]<sup>+</sup>), found:  $m/z$  214.0976 ([M + H]<sup>+</sup>).

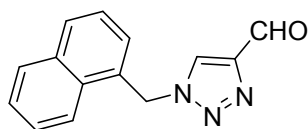

### 1-(Naphthalen-1-ylmethyl)-1H-1,2,3-triazole-4-carbaldehyde (3)

The compound was prepared according to general procedure with  $\alpha$ -bromoacrolein (0.2 mmol, 27.0 mg) and 1-(azidomethyl)naphthalene (0.13 mmol, 23.8 mg) in 200  $\mu$ L of DMSO/H<sub>2</sub>O (7:3 vol/vol) over a course of 36 h at room temperature. The crude material was purified by column chromatography on silica gel (eluting with ethyl acetate/hexane = 1:1) to give the desired product [90% yield (27.8 mg)] as a white solid (mp: 99-100 °C, decomposed).

$R_f$  0.25 (ethyl acetate/hexane = 1:1);  $^1\text{H}$  NMR (500 MHz,  $\text{CDCl}_3$ )  $\delta$  10.04 (s, 1H), 7.96 – 7.85 (m, 3H), 7.84 (s, 1H), 7.56 – 7.45 (m, 4H), 6.01 (s, 2H) ppm;  $^{13}\text{C}$  NMR (126 MHz,  $\text{CDCl}_3$ )  $\delta$  185.0, 147.9, 134.1, 131.0, 130.7, 129.2, 128.7, 128.5, 127.7, 126.7, 125.5, 125.3, 122.5, 52.6 ppm; IR (neat) 3067, 2922, 2842, 1686, 1526, 1249, 1169, 1040, 794, 779  $\text{cm}^{-1}$ ; HRMS (ESI) exact mass calcd. for  $\text{C}_{14}\text{H}_{11}\text{N}_3\text{O}$ :  $m/z$  238.0975 ( $[\text{M} + \text{H}]^+$ ), found:  $m/z$  238.0974 ( $[\text{M} + \text{H}]^+$ ).

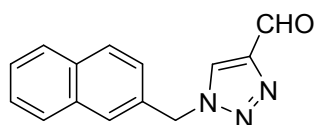

#### 1-(Naphthalen-2-ylmethyl)-1H-1,2,3-triazole-4-carbaldehyde (4)

The compound was prepared according to general procedure with  $\alpha$ -bromoacrolein (0.2 mmol, 27.0 mg) and 2-(azidomethyl)naphthalene (0.13 mmol, 23.8 mg) in 200  $\mu\text{L}$  of  $\text{DMSO}/\text{H}_2\text{O}$  (7:3 vol/vol) over a course of 36 h at room temperature. The crude material was purified by column chromatography on silica gel (eluting with ethyl acetate/hexane = 1:1) to give the desired product [99% yield (30.4 mg)] as a white solid (mp: 86-88  $^\circ\text{C}$ ).

$R_f$  0.25 (ethyl acetate/hexane = 1:1);  $^1\text{H}$  NMR (500 MHz,  $\text{CDCl}_3$ )  $\delta$  10.10 (s, 1H), 8.05 (s, 1H), 7.87 – 7.79 (m, 3H), 7.77 (s, 1H), 7.55 – 7.49 (m, 2H), 7.36 – 7.31 (m, 1H), 5.71 (s, 2H) ppm;  $^{13}\text{C}$  NMR (126 MHz,  $\text{CDCl}_3$ )  $\delta$  185.0, 148.0, 133.3, 133.2, 130.8, 129.5, 128.0, 127.9, 127.9, 127.1, 127.0, 125.4, 125.3, 54.8 ppm; IR (neat) 3057, 2930, 2844, 1707, 1535, 1557, 1175, 1050, 865, 759  $\text{cm}^{-1}$ ; HRMS (ESI) exact mass calcd. for  $\text{C}_{14}\text{H}_{11}\text{N}_3\text{O}$ :  $m/z$  238.0975 ( $[\text{M} + \text{H}]^+$ ), found:  $m/z$  238.0976 ( $[\text{M} + \text{H}]^+$ ).

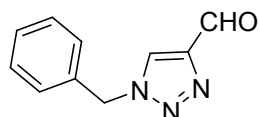

#### 1-Benzyl-1H-1,2,3-triazole-4-carbaldehyde (5)

The compound was prepared according to general procedure with  $\alpha$ -bromoacrolein (0.2 mmol, 27.0 mg) and (azidomethyl)benzene (0.13 mmol, 17.3 mg) in 200  $\mu$ L of DMSO/H<sub>2</sub>O (7:3 vol/vol) over a course of 36 h at room temperature. The crude material was purified by column chromatography on silica gel (eluting with ethyl acetate/hexane = 1:1) to give the desired product [96% yield (23.3 mg)] as a colorless oil as a white solid (mp: 71-73 °C).

$R_f$  0.20 (ethyl acetate/hexane = 1:1); <sup>1</sup>H NMR (500 MHz, CDCl<sub>3</sub>)  $\delta$  10.10 (s, 1H), 8.05 (s, 1H), 7.44 – 7.36 (m, 3H), 7.34 – 7.29 (m, 2H), 5.60 (s, 2H) ppm; <sup>13</sup>C NMR (126 MHz, CDCl<sub>3</sub>)  $\delta$  185.0, 148.0, 133.5, 129.4, 129.3, 128.4, 125.3, 54.6 ppm; IR (neat) 3036, 2922, 2851, 1691, 1532, 1446, 1236, 1163, 1050, 765, 699 cm<sup>-1</sup>; HRMS (ESI) exact mass calcd. for C<sub>10</sub>H<sub>9</sub>N<sub>3</sub>O: m/z 188.0818 ([M + H]<sup>+</sup>), found: m/z 188.0820 ([M + H]<sup>+</sup>).

The configuration of the compound was assigned based on single-crystal X-ray analysis.

CCDC 1864100 contains the supplementary crystallographic data for this compound. These data can be obtained free of charge at [www.ccdc.cam.ac.uk/conts/retrieving.html](http://www.ccdc.cam.ac.uk/conts/retrieving.html) [or from the Cambridge Crystallographic Data Centre, 12 Union Road, Cambridge CB2 1EZ, UK; fax: (internat.) +44(1223)336-033, E-mail: [deposit@ccdc.cam.ac.uk](mailto:deposit@ccdc.cam.ac.uk)].

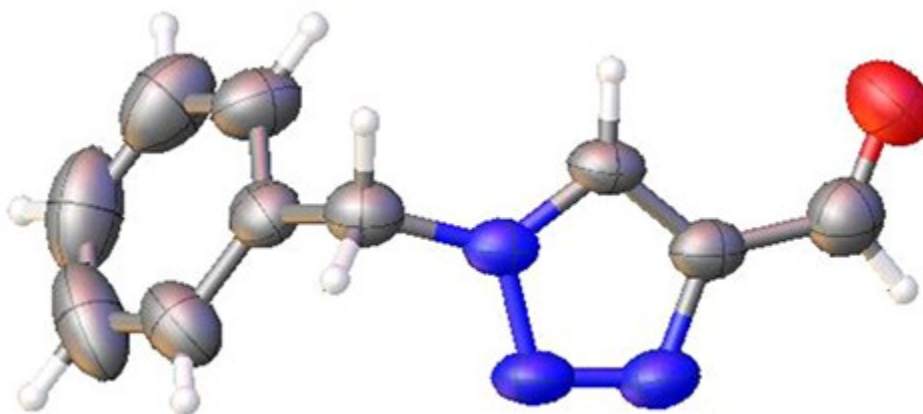

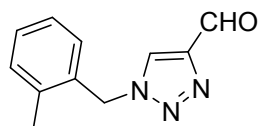

**1-(2-Methylbenzyl)-1H-1,2,3-triazole-4-carbaldehyde (6)**

The compound was prepared according to general procedure with  $\alpha$ -bromoacrolein (0.2 mmol, 27.0 mg) and 1-(azidomethyl)-2-methylbenzene (0.13 mmol, 19.1 mg) in 200  $\mu$ L of DMSO/H<sub>2</sub>O (7:3 vol/vol) over a course of 36 h at room temperature. The crude material was purified by column chromatography on silica gel (eluting with ethyl acetate/hexane = 1:1) to give the desired product [96% yield (25.1 mg)] as a white solid (mp: 58-60 °C).

$R_f$  0.25 (ethyl acetate/hexane = 1:1); <sup>1</sup>H NMR (500 MHz, CDCl<sub>3</sub>)  $\delta$  10.10 (s, 1H), 7.89 (s, 1H), 7.40 – 7.12 (m, 4H), 5.60 (s, 2H), 2.28 (s, 3H) ppm; <sup>13</sup>C NMR (126 MHz, CDCl<sub>3</sub>)  $\delta$  185.0, 147.8, 137.0, 131.3, 131.3, 129.8, 129.7, 126.9, 125.0, 77.4, 77.1, 76.8, 52.7, 18.9 ppm; IR (neat) 3038, 2930, 2853, 1693, 1522, 1451, 1355, 1119, 775, 747, 738 cm<sup>-1</sup>; HRMS (ESI) exact mass calcd. for C<sub>11</sub>H<sub>11</sub>N<sub>3</sub>O: m/z 202.0975 ([M + H]<sup>+</sup>), found: m/z 202.0976 ([M + H]<sup>+</sup>).

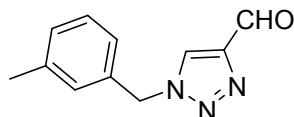

**1-(3-Methylbenzyl)-1H-1,2,3-triazole-4-carbaldehyde (7)**

The compound was prepared according to general procedure with  $\alpha$ -bromoacrolein (0.2 mmol, 27.0 mg) and 1-(azidomethyl)-3-methylbenzene (0.13 mmol, 19.1 mg) in 200  $\mu$ L of DMSO/H<sub>2</sub>O (7:3 vol/vol) over a course of 36 h at room temperature. The crude material was purified by column chromatography on silica gel (eluting with ethyl acetate/hexane = 1:1) to give the desired product [97% yield (25.4 mg)] as a white solid (mp: 44-45 °C).

$R_f$  0.20 (ethyl acetate/hexane = 1:1); <sup>1</sup>H NMR (500 MHz, CDCl<sub>3</sub>)  $\delta$  10.10 (s, 1H), 8.04 (s, 1H), 7.31 – 7.28 (m, 1H), 7.20 (d,  $J$  = 7.7 Hz, 1H), 7.11 (d,  $J$  = 8.0 Hz, 2H), 5.55 (s, 2H), 2.35 (s, 3H)



ppm;  $^{13}\text{C}$  NMR (126 MHz,  $\text{CDCl}_3$ )  $\delta$  185.1, 148.0, 139.3, 133.4, 130.1, 129.3, 129.1, 125.5, 125.3, 54.6, 21.3 ppm; IR (neat) 3028, 2922, 1686, 1608, 1531, 1344, 1234, 1162, 1048, 779, 728  $\text{cm}^{-1}$ ; HRMS (ESI) exact mass calcd. for  $\text{C}_{11}\text{H}_{11}\text{N}_3\text{O}$ :  $m/z$  202.0975 ( $[\text{M} + \text{H}]^+$ ), found:  $m/z$  202.0975 ( $[\text{M} + \text{H}]^+$ ).

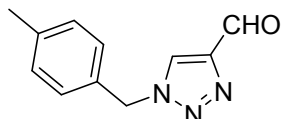

#### 1-(4-Methylbenzyl)-1H-1,2,3-triazole-4-carbaldehyde (8)

The compound was prepared according to general procedure with  $\alpha$ -bromoacrolein (0.2 mmol, 27.0 mg) and 1-(azidomethyl)-4-methylbenzene (0.13 mmol, 19.1 mg) in 200  $\mu\text{L}$  of  $\text{DMSO}/\text{H}_2\text{O}$  (7:3 vol/vol) over a course of 36 h at room temperature. The crude material was purified by column chromatography on silica gel (eluting with ethyl acetate/hexane = 1:1) to give the desired product [98% yield (25.7 mg)] as a white solid (mp: 66-67  $^\circ\text{C}$ ).

$R_f$  0.20 (ethyl acetate/hexane = 1:1);  $^1\text{H}$  NMR (500 MHz,  $\text{CDCl}_3$ )  $\delta$  10.10 (s, 1H), 8.01 (s, 1H), 7.20 (s, 4H), 5.55 (s, 2H), 2.36 (s, 3H) ppm;  $^{13}\text{C}$  NMR (126 MHz,  $\text{CDCl}_3$ )  $\delta$  185.1, 148.0, 139.4, 130.4, 130.1, 128.5, 125.2, 54.4, 21.2 ppm; IR (neat) 3032, 2924, 2853, 1685, 1524, 1459, 1430, 1354, 1240, 1045, 772, 756  $\text{cm}^{-1}$ ; HRMS (ESI) exact mass calcd. for  $\text{C}_{11}\text{H}_{11}\text{N}_3\text{O}$ :  $m/z$  224.0794 ( $[\text{M} + \text{Na}]^+$ ), found:  $m/z$  224.0796 ( $[\text{M} + \text{Na}]^+$ ).

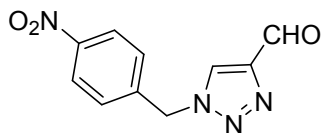

#### 1-(4-Nitrobenzyl)-1H-1,2,3-triazole-4-carbaldehyde (9)

The compound was prepared according to general procedure with  $\alpha$ -bromoacrolein (0.2 mmol,

27.0 mg) and 1-(azidomethyl)-4-nitrobenzene (0.13 mmol, 23.2 mg) in 200  $\mu$ L of DMSO/H<sub>2</sub>O (7:3 vol/vol) over a course of 36 h at room temperature. The crude material was purified by column chromatography on silica gel (eluting with ethyl acetate/hexane = 1:1) to give the desired product [88% yield (26.6 mg)] as a light yellow solid (mp: 124-126 °C).

$R_f$  0.25 (ethyl acetate/hexane = 1:1); <sup>1</sup>H NMR (500 MHz, CDCl<sub>3</sub>)  $\delta$  10.15 (s, 1H), 8.26 (d,  $J$  = 8.7 Hz, 2H), 8.15 (s, 1H), 7.48 (d,  $J$  = 8.7 Hz, 2H), 5.74 (s, 2H) ppm; <sup>13</sup>C NMR (126 MHz, CDCl<sub>3</sub>)  $\delta$  184.9, 148.5, 148.4, 140.5, 129.1, 125.5, 124.6, 53.6 ppm; IR (neat) cm<sup>-1</sup>; HRMS (ESI) exact mass calcd. for C<sub>10</sub>H<sub>8</sub>N<sub>4</sub>O<sub>3</sub>:  $m/z$  255.0489 ([M + Na]<sup>+</sup>), found:  $m/z$  255.0493 ([M + Na]<sup>+</sup>).

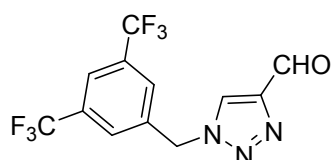

#### 1-(3,5-Bis(trifluoromethyl)benzyl)-1H-1,2,3-triazole-4-carbaldehyde (10)

The compound was prepared according to general procedure with  $\alpha$ -bromoacrolein (0.2 mmol, 27.0 mg) and 1-(azidomethyl)-3,5-bis(trifluoromethyl)benzene (0.13 mmol, 35.0 mg) in 200  $\mu$ L of DMSO/H<sub>2</sub>O (7:3 vol/vol) over a course of 36 h at room temperature. The crude material was purified by column chromatography on silica gel (eluting with ethyl acetate/hexane = 1:1) to give the desired product [84% yield (35.1 mg)] as a colorless oil as a white solid (mp: 105-106 °C).

$R_f$  0.20 (ethyl acetate/hexane = 1:1); <sup>1</sup>H NMR (500 MHz, CDCl<sub>3</sub>)  $\delta$  10.15 (s, 1H), 8.24 (s, 1H), 7.92 (s, 1H), 7.81 (s, 2H), 5.77 (s, 2H) ppm; <sup>13</sup>C NMR (126 MHz, CDCl<sub>3</sub>)  $\delta$  185.0, 148.4, 136.2, 133.0 (q,  $J_{CF}$  = 34.0 Hz), 128.5 (q,  $J_{CF}$  = 3.8 Hz), 125.6, 123.4 (m,  $J_{CF}$  = 3.8 Hz), 122.9 (q,  $J_{CF}$  = 274.3 Hz), 53.5, 29.8 ppm; IR (neat) 3038, 2930, 2857, 1700, 1686, 1283, 1170, 1118, 784, 702 cm<sup>-1</sup>; HRMS (ESI) exact mass calcd. for C<sub>12</sub>H<sub>7</sub>F<sub>6</sub>N<sub>3</sub>O:  $m/z$  324.0566 ([M + H]<sup>+</sup>), found:  $m/z$  324.0570 ([M + H]<sup>+</sup>).

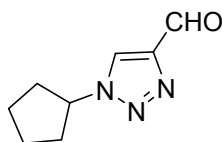

### 1-Cyclopentyl-1H-1,2,3-triazole-4-carbaldehyde (11)

The compound was prepared according to general procedure with  $\alpha$ -bromoacrolein (0.2 mmol, 27.0 mg) and azidocyclopentane (0.13 mmol, 14.4 mg) in 200  $\mu$ L of DMSO/H<sub>2</sub>O (7:3 vol/vol) over a course of 36 h at room temperature. The crude material was purified by column chromatography on silica gel (eluting with ethyl acetate/hexane = 1:1) to give the desired product [90% yield (19.4 mg)] as a colorless oil.

$R_f$  0.20 (ethyl acetate/hexane = 1:1); <sup>1</sup>H NMR (500 MHz, CDCl<sub>3</sub>)  $\delta$  10.14 (s, 1H), 8.16 (s, 1H), 5.06 – 4.98 (m, 1H), 2.41 – 2.25 (m, 2H), 2.13 – 2.03 (m, 2H), 1.99 – 1.88 (m, 2H), 1.87 – 1.75 (m, 2H) ppm; <sup>13</sup>C NMR (126 MHz, CDCl<sub>3</sub>)  $\delta$  185.3, 147.6, 123.9, 62.5, 33.5, 24.0 ppm; IR (neat) 2923, 2853, 1724, 1459, 1373, 1100 cm<sup>-1</sup>; HRMS (ESI) exact mass calcd. for C<sub>8</sub>H<sub>11</sub>N<sub>3</sub>O: m/z 166.0975 ([M + H]<sup>+</sup>), found: m/z 166.0976 ([M + H]<sup>+</sup>).

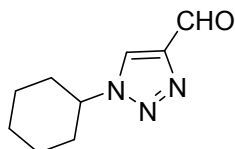

### 1-Cyclohexyl-1H-1,2,3-triazole-4-carbaldehyde (12)

The compound was prepared according to general procedure with  $\alpha$ -bromoacrolein (0.2 mmol, 27.0 mg) and azidocyclohexane (0.13 mmol, 16.3 mg) in 200  $\mu$ L of DMSO/H<sub>2</sub>O (7:3 vol/vol) over a course of 36 h at room temperature. The crude material was purified by column chromatography on silica gel (eluting with ethyl acetate/hexane = 1:1) to give the desired product [82% yield (19.1 mg)] as a white solid (mp: 79-80 °C).

$R_f$  0.20 (ethyl acetate/hexane = 1:1);  $^1\text{H}$  NMR (500 MHz,  $\text{CDCl}_3$ )  $\delta$  10.14 (s, 1H), 8.17 (s, 1H), 4.59 – 4.49 (m, 1H), 2.33 – 2.19 (m, 2H), 2.01 – 1.91 (m, 2H), 1.84 – 1.73 (m, 3H), 1.56 – 1.44 (m, 2H), 1.38 – 1.24 (m, 1H) ppm;  $^{13}\text{C}$  NMR (126 MHz,  $\text{CDCl}_3$ )  $\delta$  185.3, 147.5, 123.2, 60.7, 33.4, 25.0, 25.0 ppm; IR (neat) 3026, 2925, 2849, 1682, 1448, 1247, 1187, 1048, 779  $\text{cm}^{-1}$ ; HRMS (ESI) exact mass calcd. for  $\text{C}_9\text{H}_{13}\text{N}_3\text{O}$ :  $m/z$  180.1131 ( $[\text{M} + \text{H}]^+$ ), found:  $m/z$  180.1132 ( $[\text{M} + \text{H}]^+$ ).

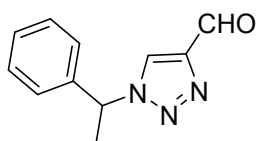

### 1-(1-Phenylethyl)-1H-1,2,3-triazole-4-carbaldehyde (13)

The compound was prepared according to general procedure with  $\alpha$ -bromoacrolein (0.2 mmol, 27.0 mg) and (1-azidoethyl) benzene (0.13 mmol, 19.1 mg) in 200  $\mu\text{L}$  of DMSO/ $\text{H}_2\text{O}$  (7:3 vol/vol) over a course of 36 h at room temperature. The crude material was purified by column chromatography on silica gel (eluting with ethyl acetate/hexane = 1:1) to give the desired product [77% yield (20.2 mg)] as a colorless oil.

$R_f$  0.20 (ethyl acetate/hexane = 1:1);  $^1\text{H}$  NMR (500 MHz,  $\text{CDCl}_3$ )  $\delta$  10.12 (s, 1H), 8.00 (s, 1H), 7.43 – 7.35 (m, 3H), 7.33 – 7.28 (m, 2H), 5.88 (q,  $J = 7.1$  Hz, 1H), 2.03 (d,  $J = 7.1$  Hz, 3H) ppm;  $^{13}\text{C}$  NMR (126 MHz,  $\text{CDCl}_3$ )  $\delta$  185.3, 147.7, 138.7, 129.4, 129.2, 126.8, 124.2, 61.1, 21.3 ppm; IR (neat) 3097, 2990, 2875, 1691, 1532, 1443, 1190, 1146, 1048, 1018, 759, 696  $\text{cm}^{-1}$ ; HRMS (ESI) exact mass calcd. for  $\text{C}_{11}\text{H}_{11}\text{N}_3\text{O}$ :  $m/z$  224.0994 ( $[\text{M} + \text{Na}]^+$ ), found:  $m/z$  224.0995 ( $[\text{M} + \text{Na}]^+$ ).

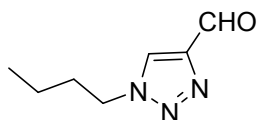

### 1-Butyl-1H-1,2,3-triazole-4-carbaldehyde (14)

The compound was prepared according to general procedure with  $\alpha$ -bromoacrolein (0.2 mmol, 27.0 mg) and 1-azidobutane (0.13 mmol, 12.9 mg) in 200  $\mu$ L of DMSO/H<sub>2</sub>O (7:3 vol/vol) over a course of 36 h at room temperature. The crude material was purified by column chromatography on silica gel (eluting with ethyl acetate/hexane = 1:1) to give the desired product [88% yield (17.5 mg)] as a colorless oil.

$R_f$  0.25 (ethyl acetate/hexane = 1:1); <sup>1</sup>H NMR (500 MHz, CDCl<sub>3</sub>)  $\delta$  10.13 (s, 1H), 8.13 (s, 1H), 4.44 (t,  $J$  = 7.2 Hz, 2H), 1.97 – 1.89 (m, 2H), 1.42 – 1.32 (m, 2H), 0.97 (t,  $J$  = 7.4 Hz, 3H) ppm; <sup>13</sup>C NMR (126 MHz, CDCl<sub>3</sub>)  $\delta$  185.3, 147.8, 125.1, 50.6, 32.1, 19.7, 13.4 ppm; IR (neat) 3047, 2963, 2876, 1695, 1531, 1465, 1237, 1140, 1042, 780 cm<sup>-1</sup>; HRMS (ESI) exact mass calcd. for C<sub>7</sub>H<sub>11</sub>N<sub>3</sub>O:  $m/z$  154.0975 ([M + H]<sup>+</sup>), found:  $m/z$  154.0977 ([M + H]<sup>+</sup>).

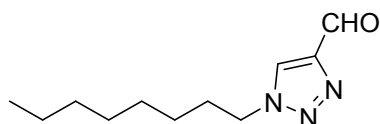

#### 1-Octyl-1*H*-1,2,3-triazole-4-carbaldehyde (15)

The compound was prepared according to general procedure with  $\alpha$ -bromoacrolein (0.2 mmol, 27.0 mg) and 1-azidooctane (0.13 mmol, 20.2 mg) in 200  $\mu$ L of DMSO/H<sub>2</sub>O (7:3 vol/vol) over a course of 36 h at room temperature. The crude material was purified by column chromatography on silica gel (eluting with ethyl acetate/hexane = 1:1) to give the desired product [82% yield (22.4 mg)] as a white solid (mp: 46-47 °C).

$R_f$  0.25 (ethyl acetate/hexane = 1:1); <sup>1</sup>H NMR (500 MHz, CDCl<sub>3</sub>)  $\delta$  10.14 (s, 1H), 8.16 (s, 1H), 4.45 (t,  $J$  = 7.2 Hz, 2H), 2.01 – 1.89 (m, 2H), 1.40 – 1.18 (m, 10H), 0.87 (t,  $J$  = 6.8 Hz, 3H) ppm; <sup>13</sup>C NMR (126 MHz, CDCl<sub>3</sub>)  $\delta$  185.2, 147.8, 125.2, 50.9, 31.7, 30.1, 29.0, 28.9, 26.4, 22.6, 14.1 ppm; IR (neat) 3042, 2917, 1851, 1685, 1470, 1438, 1354, 1248, 1046, 777 cm<sup>-1</sup>; HRMS (ESI) exact mass calcd. for C<sub>11</sub>H<sub>11</sub>N<sub>3</sub>O:  $m/z$  210.1601 ([M + H]<sup>+</sup>), found:  $m/z$  210.1601 ([M + H]<sup>+</sup>).

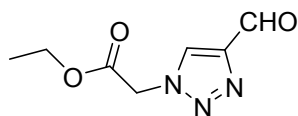

**Ethyl 2-(4-formyl-1*H*-1,2,3-triazol-1-yl)acetate (16)**

The compound was prepared according to general procedure with  $\alpha$ -bromoacrolein (0.2 mmol, 27.0 mg) and ethyl 2-azidoacetate (0.13 mmol, 16.8 mg) in 200  $\mu$ L of anhydrous DMSO over a course of 36 h at room temperature. The crude material was purified by column chromatography on silica gel (eluting with ethyl acetate/hexane = 1:1) to give the desired product [86% yield (20.4 mg)] as a white solid (mp: 43-45 °C).

$R_f$  0.20 (ethyl acetate/hexane = 1:1);  $^1\text{H}$  NMR (500 MHz,  $\text{CDCl}_3$ )  $\delta$  10.16 (s, 1H), 8.31 (s, 1H), 5.26 (s, 2H), 4.30 (q,  $J$  = 7.1 Hz, 2H), 1.32 (t,  $J$  = 7.1 Hz, 3H) ppm;  $^{13}\text{C}$  NMR (126 MHz,  $\text{CDCl}_3$ )  $\delta$  184.9, 165.6, 148.1, 127.0, 63.0, 51.1, 29.8, 14.1 ppm; IR (neat) 3061, 2961, 2846, 1742, 1701, 1543, 1382, 1215, 1048, 1016, 795  $\text{cm}^{-1}$ ; HRMS (ESI) exact mass calcd. for  $\text{C}_7\text{H}_9\text{N}_3\text{O}_3$ :  $m/z$  184.0717 ( $[\text{M} + \text{H}]^+$ ), found:  $m/z$  184.0719 ( $[\text{M} + \text{H}]^+$ ).

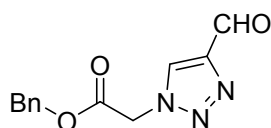

**Benzyl 2-(4-formyl-1*H*-1,2,3-triazol-1-yl)acetate (17)**

The compound was prepared according to general procedure with  $\alpha$ -bromoacrolein (0.2 mmol, 27.0 mg) and benzyl 2-azidoacetate (0.13 mmol, 24.9 mg) in 200  $\mu$ L of anhydrous DMSO over a course of 36 h at room temperature. The crude material was purified by column chromatography on silica gel (eluting with ethyl acetate/hexane = 1:1) to give the desired product [75% yield (24.0 mg)] as a white solid (mp: 83-85 °C).

$R_f$  0.20 (ethyl acetate/hexane = 1:1);  $^1\text{H}$  NMR (500 MHz,  $\text{CDCl}_3$ )  $\delta$  10.14 (s, 1H), 8.28 (s, 1H), 7.43 – 7.31 (m, 5H), 5.28 (s, 2H), 5.24 (s, 2H) ppm;  $^{13}\text{C}$  NMR (126 MHz,  $\text{CDCl}_3$ )  $\delta$  184.9, 165.5, 148.1, 134.3, 129.1, 128.9, 128.8, 127.0, 68.6, 51.1 ppm; IR (neat) 3059, 2935, 2851, 1752, 1683, 1538, 1457, 1200, 1046, 731, 688  $\text{cm}^{-1}$ ; HRMS (ESI) exact mass calcd. for  $\text{C}_{12}\text{H}_{11}\text{N}_3\text{O}_3$ :  $m/z$  246.0873 ( $[\text{M} + \text{H}]^+$ ), found:  $m/z$  246.0871 ( $[\text{M} + \text{H}]^+$ ).

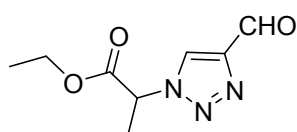

#### **Ethyl 2-(4-formyl-1H-1,2,3-triazol-1-yl)propanoate (18)**

The compound was prepared according to general procedure with  $\alpha$ -bromoacrolein (0.2 mmol, 27.0 mg) and ethyl 2-azidopropanoate (0.13 mmol, 18.6 mg) in 200  $\mu\text{L}$  of anhydrous DMSO over a course of 36 h at room temperature. The crude material was purified by column chromatography on silica gel (eluting with ethyl acetate/hexane = 1:1) to give the desired product [82% yield (21.1 mg)] as a colorless oil.

$R_f$  0.20 (ethyl acetate/hexane = 1:1);  $^1\text{H}$  NMR (500 MHz,  $\text{CDCl}_3$ )  $\delta$  10.16 (s, 1H), 8.38 (s, 1H), 5.55 (q,  $J = 7.4$  Hz, 1H), 4.26 (q,  $J = 7.1$  Hz, 2H), 1.91 (d,  $J = 7.5$  Hz, 3H), 1.29 (t,  $J = 7.2$  Hz, 3H) ppm;  $^{13}\text{C}$  NMR (126 MHz,  $\text{CDCl}_3$ )  $\delta$  185.0, 168.6, 147.9, 125.1, 62.8, 58.6, 18.3, 14.1 ppm; IR (neat) 3049, 2988, 2847, 1742, 1697, 1533, 1453, 1186, 1067, 1043, 771  $\text{cm}^{-1}$ ; HRMS (ESI) exact mass calcd. for  $\text{C}_8\text{H}_{11}\text{N}_3\text{O}_3$ :  $m/z$  220.0693 ( $[\text{M} + \text{Na}]^+$ ), found:  $m/z$  220.0695 ( $[\text{M} + \text{Na}]^+$ ).

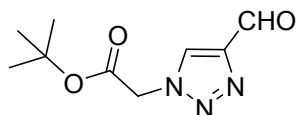

#### **Tert-butyl 2-(4-formyl-1H-1,2,3-triazol-1-yl)acetate (19)**

The compound was prepared according to general procedure with  $\alpha$ -bromoacrolein (0.2 mmol, 27.0 mg) and *tert*-butyl 2-azidoacetate (0.13 mmol, 20.4 mg) in 200  $\mu$ L of anhydrous DMSO over a course of 36 h at room temperature. The crude material was purified by column chromatography on silica gel (eluting with ethyl acetate/hexane = 1:1) to give the desired product [60% yield (16.5 mg)] as a colorless oil.

$R_f$  0.20 (ethyl acetate/hexane = 1:1);  $^1\text{H}$  NMR (500 MHz,  $\text{CDCl}_3$ )  $\delta$  10.16 (s, 1H), 8.27 (s, 1H), 5.15 (s, 2H), 1.50 (s, 9H) ppm;  $^{13}\text{C}$  NMR (126 MHz,  $\text{CDCl}_3$ )  $\delta$  185.0, 164.5, 148.1, 126.9, 84.7, 51.8, 28.1 ppm; IR (neat) 2961, 2871, 1740, 1683, 1369, 1236, 1048, 768  $\text{cm}^{-1}$ ; HRMS (ESI) exact mass calcd. for  $\text{C}_9\text{H}_{13}\text{N}_3\text{O}_3$ :  $m/z$  212.1030 ( $[\text{M} + \text{H}]^+$ ), found:  $m/z$  212.1031 ( $[\text{M} + \text{H}]^+$ ).

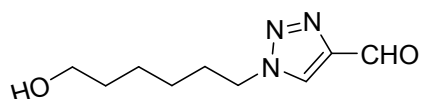

#### 1-(6-Hydroxyhexyl)-1H-1,2,3-triazole-4-carbaldehyde (20)

The compound was prepared according to general procedure with  $\alpha$ -bromoacrolein (0.2 mmol, 27.0 mg) and 6-azidohexan-1-ol (0.13 mmol, 18.6 mg) in 200  $\mu$ L of DMSO/ $\text{H}_2\text{O}$  (7:3 vol/vol) over a course of 36 h at room temperature. The crude material was purified by column chromatography on silica gel (eluting with ethyl acetate/hexane = 1:1) to give the desired product [91% yield (23.4 mg)] as a colorless oil.

$R_f$  0.20 (ethyl acetate/hexane = 3:1);  $^1\text{H}$  NMR (500 MHz,  $\text{CDCl}_3$ )  $\delta$  10.14 (s, 1H), 8.13 (s, 1H), 4.45 (t,  $J$  = 7.2 Hz, 2H), 3.64 (t,  $J$  = 6.4 Hz, 2H), 2.02 – 1.92 (m, 2H), 1.81 (s, 1H), 1.61 – 1.52 (m, 2H), 1.50 – 1.34 (m, 4H) ppm;  $^{13}\text{C}$  NMR (126 MHz,  $\text{CDCl}_3$ )  $\delta$  185.3, 147.9, 125.2, 62.6, 50.8, 32.4, 30.1, 26.2, 25.2 ppm; IR (neat) 3382, 2937, 2859, 1694, 1528, 1044, 780  $\text{cm}^{-1}$ ; HRMS (ESI) exact mass calcd. for  $\text{C}_9\text{H}_{15}\text{N}_3\text{O}_2$ :  $m/z$  198.1237 ( $[\text{M} + \text{H}]^+$ ), found:  $m/z$  198.1238 ( $[\text{M} + \text{H}]^+$ ).



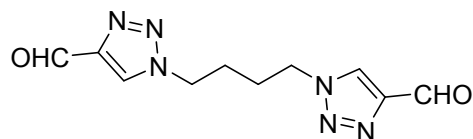

**1,1'-(Butane-1,4-diyl)bis(1*H*-1,2,3-triazole-4-carbaldehyde) (21)**

The compound was prepared according to general procedure with  $\alpha$ -bromoacrolein (0.39 mmol, 52.6 mg) and 1,4-diazidobutane (0.13 mmol, 18.2 mg) in 300  $\mu$ L of DMSO/H<sub>2</sub>O (7:3 vol/vol) over a course of 36 h at room temperature. The crude material was purified by column chromatography on silica gel (eluting with ethyl acetate/hexane = 1:1) to give the desired product [83% yield (26.9 mg)] as a white solid (mp: 169-170 °C).

$R_f$  0.20 (ethyl acetate/hexane = 1:1); <sup>1</sup>H NMR (500 MHz, Acetone)  $\delta$  10.05 (s, 2H), 8.63 (s, 2H), 4.64 – 4.62 (m, 5H), 2.25 – 1.76 (m, 13H) ppm; <sup>13</sup>C NMR (126 MHz, Acetone)  $\delta$  206.1, 185.3, 127.4, 50.4, 27.7 ppm; IR (neat) 3110, 2953, 2842, 1683, 1435, 1347, 1242, 1044, 1011, 799 cm<sup>-1</sup>; HRMS (ESI) exact mass calcd. for C<sub>10</sub>H<sub>12</sub>N<sub>6</sub>O<sub>2</sub>: m/z 271.0914 ([M + Na]<sup>+</sup>), found: m/z 271.0916 ([M + Na]<sup>+</sup>).

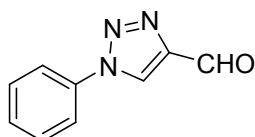

**1-Phenyl-1*H*-1,2,3-triazole-4-carbaldehyde (22)**

The compound was prepared according to general procedure with  $\alpha$ -bromoacrolein (0.26 mmol, 35.1 mg) and phenyl azide (0.13 mmol, 15.5 mg) in 200  $\mu$ L of DMSO/H<sub>2</sub>O (7:3 vol/vol) over a course of 48 h at 40 °C. The crude material was purified by column chromatography on silica gel (eluting with ethyl acetate/hexane = 1:1) to give the desired product [80% yield (18.0 mg)] as a light yellow solid (mp: 89-91 °C).

$R_f$  0.20 (ethyl acetate/hexane = 1:1);  $^1\text{H}$  NMR (500 MHz,  $\text{CDCl}_3$ )  $\delta$  10.24 (s, 1H), 8.54 (s, 1H), 7.81 – 7.73 (m, 2H), 7.63 – 7.56 (m, 2H), 7.56 – 7.50 (m, 1H) ppm;  $^{13}\text{C}$  NMR (126 MHz,  $\text{CDCl}_3$ )  $\delta$  185.2, 148.3, 136.3, 130.2, 130.0, 123.2, 121.0 ppm; IR (neat) 3135, 2922, 2841, 1686, 1528, 1500, 1210, 758  $\text{cm}^{-1}$ ; HRMS (ESI) exact mass calcd. for  $\text{C}_9\text{H}_7\text{N}_3\text{O}$ :  $m/z$  174.0662 ( $[\text{M} + \text{H}]^+$ ), found:  $m/z$  174.0633 ( $[\text{M} + \text{H}]^+$ ).

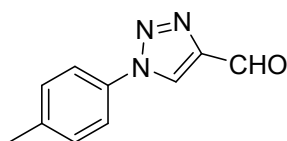

### 1-(*p*-tolyl)-1H-1,2,3-triazole-4-carbaldehyde (**23**)

The compound was prepared according to general procedure with  $\alpha$ -bromoacrolein (0.26 mmol, 35.1 mg) and *p*-tolyl azide (0.13 mmol, 17.3 mg) in 200  $\mu\text{L}$  of DMSO/ $\text{H}_2\text{O}$  (7:3 vol/vol) over a course of 48 h at 40°C. The crude material was purified by column chromatography on silica gel (eluting with ethyl acetate/hexane = 1:1) to give the desired product [76% yield (18.6 mg)] as a white solid (mp: 104-105 °C).

$R_f$  0.20 (ethyl acetate/hexane = 1:1);  $^1\text{H}$  NMR (500 MHz,  $\text{CDCl}_3$ )  $\delta$  10.22 (s, 1H), 8.51 (s, 1H), 7.64 (d,  $J$  = 8.4 Hz, 2H), 7.37 (d,  $J$  = 8.1 Hz, 2H), 2.45 (s, 3H) ppm;  $^{13}\text{C}$  NMR (126 MHz,  $\text{CDCl}_3$ )  $\delta$  185.2, 148.2, 140.3, 134.0, 130.7, 123.2, 120.9, 21.3 ppm; IR (neat) 3098, 2922, 2837, 1703, 1513, 1254, 1206, 1050, 987, 816, 770  $\text{cm}^{-1}$ ; HRMS (ESI) exact mass calcd. for  $\text{C}_{10}\text{H}_9\text{N}_3\text{O}$ :  $m/z$  188.0818 ( $[\text{M} + \text{H}]^+$ ), found:  $m/z$  188.0819 ( $[\text{M} + \text{H}]^+$ ).

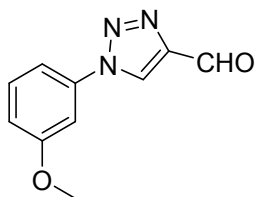

### 1-(3-Methoxyphenyl)-1*H*-1,2,3-triazole-4-carbaldehyde (24)

The compound was prepared according to general procedure with  $\alpha$ -bromoacrolein (0.26 mmol, 35.1 mg) and *m*-methoxy benzyl azide (0.13 mmol, 19.4 mg) in 200  $\mu$ L of DMSO/H<sub>2</sub>O (7:3 vol/vol) over a course of 48 h at 40 °C. The crude material was purified by column chromatography on silica gel (eluting with ethyl acetate/hexane = 1:1) to give the desired product [81% yield (21.5 mg)] as a light yellow solid (mp: 95-96 °C).

$R_f$  0.20 (ethyl acetate/hexane = 1:1); <sup>1</sup>H NMR (500 MHz, CDCl<sub>3</sub>)  $\delta$  10.23 (s, 1H), 8.55 (s, 1H), 7.51 – 7.43 (m, 1H), 7.39 – 7.34 (m, 1H), 7.32 – 7.25 (m, 1H), 7.08 – 7.02 (m, 1H), 3.91 (s, 3H) ppm; <sup>13</sup>C NMR (126 MHz, CDCl<sub>3</sub>)  $\delta$  185.2, 160.8, 148.1, 137.2, 131.0, 123.4, 115.7, 112.8, 106.9, 55.8 ppm; IR (neat) 3094, 2920, 1689, 1598, 1504, 1254, 1019, 774 cm<sup>-1</sup>; HRMS (ESI) exact mass calcd. for C<sub>10</sub>H<sub>9</sub>N<sub>3</sub>O<sub>2</sub>: m/z 204.0768 ([M + H]<sup>+</sup>), found: m/z 204.0769 ([M + H]<sup>+</sup>).

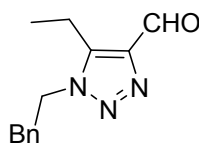

### 5-Ethyl-1-phenethyl-1*H*-1,2,3-triazole-4-carbaldehyde (25)

The compound was prepared according to general procedure with 2-bromopent-2-enal (0.26 mmol, 42.4 mg) and (2-azidoethyl) benzene (0.13 mmol, 19.1 mg) in 200  $\mu$ L of CHCl<sub>3</sub> over a course of 48 h at room temperature. The crude material was purified by column chromatography on silica gel (eluting with ethyl acetate/hexane = 1:1) to give the desired product [80% yield (23.8 mg)] as a colorless oil.

$R_f$  0.20 (ethyl acetate/hexane = 1:1); <sup>1</sup>H NMR (500 MHz, CDCl<sub>3</sub>)  $\delta$  10.16 (s, 1H), 7.33 – 7.17 (m, 3H), 7.09 – 6.97 (m, 2H), 4.49 (t,  $J$  = 7.1 Hz, 2H), 3.27 (t,  $J$  = 7.1 Hz, 2H), 2.66 (q,  $J$  = 7.6 Hz, 2H), 0.99 (t,  $J$  = 7.6 Hz, 3H) ppm; <sup>13</sup>C NMR (126 MHz, CDCl<sub>3</sub>)  $\delta$  186.04, 143.14, 142.78, 136.67, 128.93, 128.68, 127.31, 48.97, 36.52, 16.23, 12.51 ppm; IR (neat) 3030, 2936, 2832, 1690, 1556,

1473, 1454, 1262, 751, 699  $\text{cm}^{-1}$ ; HRMS (ESI) exact mass calcd. for  $\text{C}_{13}\text{H}_{15}\text{N}_3\text{O}$ :  $m/z$  230.1288 ( $[\text{M} + \text{H}]^+$ ), found:  $m/z$  230.1288 ( $[\text{M} + \text{H}]^+$ ).

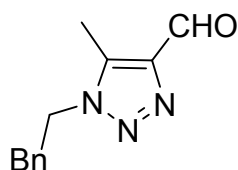

#### 5-methyl-1-phenethyl-1H-1,2,3-triazole-4-carbaldehyde (26)

The compound was prepared according to general procedure with 2-bromobut-2-enal (0.26 mmol, 38.7 mg) and (2-azidoethyl) benzene (0.13 mmol, 19.1 mg) in 200  $\mu\text{L}$  of  $\text{CHCl}_3$  over a course of 48 h at room temperature. The crude material was purified by column chromatography on silica gel (eluting with ethyl acetate/hexane = 1:1) to give the desired product [78% yield (21.8 mg)] as a colorless oil.

$R_f$  0.20 (ethyl acetate/hexane = 1:1);  $^1\text{H}$  NMR (500 MHz,  $\text{CDCl}_3$ )  $\delta$  10.16 (s, 1H), 7.37 – 7.16 (m, 3H), 7.09 – 6.93 (m, 2H), 4.49 (t,  $J$  = 6.8 Hz, 2H), 3.22 (t,  $J$  = 6.9 Hz, 2H), 2.12 (s, 3H) ppm;  $^{13}\text{C}$  NMR (126 MHz,  $\text{CDCl}_3$ )  $\delta$  186.5, 143.6, 137.6, 136.7, 129.1, 128.8, 127.5, 49.2, 36.5, 8.3 ppm; IR (neat) 2957, 2924, 2852, 1683, 1566, 1456, 1273, 1133, 723, 697  $\text{cm}^{-1}$ ; HRMS (ESI) exact mass calcd. for  $\text{C}_{11}\text{H}_{11}\text{N}_3\text{O}$ :  $m/z$  202.0975 ( $[\text{M} + \text{H}]^+$ ), found:  $m/z$  202.0977 ( $[\text{M} + \text{H}]^+$ ).

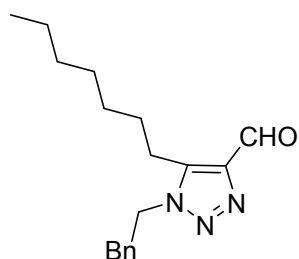

#### 5-Heptyl-1-phenethyl-1H-1,2,3-triazole-4-carbaldehyde (27)

The compound was prepared according to general procedure with 2-bromodec-2-enal (0.26 mmol,

60.6 mg) and (2-azidoethyl) benzene (0.13 mmol, 19.1 mg) in 200  $\mu$ L of  $\text{CHCl}_3$  over a course of 72 h at room temperature. The crude material was purified by column chromatography on silica gel (eluting with ethyl acetate/hexane = 1:1) to give the desired product [62% yield (24.1 mg)] as a light yellow solid (mp: 51-52  $^{\circ}\text{C}$ ).

$R_f$  0.20 (ethyl acetate/hexane = 1:1);  $^1\text{H}$  NMR (500 MHz,  $\text{CDCl}_3$ )  $\delta$  10.15 (s, 1H), 7.26 (d,  $J$  = 7.4 Hz, 2H), 7.12 – 6.97 (m, 3H), 4.47 (t,  $J$  = 7.2 Hz, 2H), 3.27 (t,  $J$  = 7.2 Hz, 2H), 2.68 – 2.54 (m, 2H), 1.42 – 1.12 (m, 10H), 0.87 (t,  $J$  = 7.0 Hz, 3H) ppm;  $^{13}\text{C}$  NMR (126 MHz,  $\text{CDCl}_3$ )  $\delta$  186.0, 143.4, 141.7, 136.7, 128.9, 128.7, 127.3, 49.1, 36.5, 31.6, 29.2, 28.7, 28.2, 22.6, 22.5, 14.0 ppm; IR (neat) 3028, 2922, 2851, 1686, 1557, 1467, 1453, 1249, 749, 697  $\text{cm}^{-1}$ ; HRMS (ESI) exact mass calcd. for  $\text{C}_{18}\text{H}_{25}\text{N}_3\text{O}$ :  $m/z$  300.2070 ( $[\text{M} + \text{H}]^+$ ), found:  $m/z$  300.2071 ( $[\text{M} + \text{H}]^+$ ).

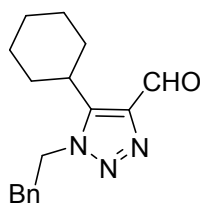

#### 5-Cyclohexyl-1-phenethyl-1H-1,2,3-triazole-4-carbaldehyde (28)

The compound was prepared according to general procedure with 2-bromo-3-cyclohexylacrylaldehyde (0.26 mmol, 56.4 mg) and (2-azidoethyl) benzene (0.13 mmol, 19.1 mg) in 200  $\mu$ L of  $\text{CHCl}_3$  over a course of 72 h at room temperature. The crude material was purified by column chromatography on silica gel (eluting with ethyl acetate/hexane = 1:1) to give the desired product [60% yield (22.1 mg)] as a white solid (mp: 71-73  $^{\circ}\text{C}$ ).

$R_f$  0.20 (ethyl acetate/hexane = 1:1);  $^1\text{H}$  NMR (500 MHz,  $\text{CDCl}_3$ )  $\delta$  10.15 (s, 1H), 7.34 – 7.20 (m, 3H), 7.09 – 7.04 (m, 2H), 4.57 (t,  $J$  = 7.1 Hz, 2H), 3.23 (t,  $J$  = 7.0 Hz, 2H), 2.59 – 2.49 (m, 1H), 1.92 – 1.80 (m, 2H), 1.79 – 1.65 (m, 3H), 1.38 – 1.30 (m, 1H), 1.20 – 1.13 (m, 4H) ppm;  $^{13}\text{C}$  NMR (126 MHz,  $\text{CDCl}_3$ )  $\delta$  185.9, 145.5, 143.7, 136.7, 129.1, 128.8, 127.4, 49.8, 37.0, 35.3, 29.2, 26.4,

25.2 ppm; IR (neat) 3059, 2924, 2851, 1686, 1536, 1461, 1448, 1253, 814, 697  $\text{cm}^{-1}$ ; HRMS (ESI) exact mass calcd. for  $\text{C}_{17}\text{H}_{21}\text{N}_3\text{O}$ :  $m/z$  284.1757 ( $[\text{M} + \text{H}]^+$ ), found:  $m/z$  284.1759 ( $[\text{M} + \text{H}]^+$ ).

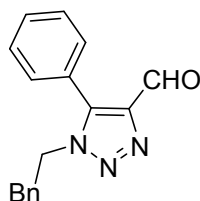

#### 1-Phenethyl-5-phenyl-1H-1,2,3-triazole-4-carbaldehyde (29)

The compound was prepared according to general procedure with 2-bromo-3-phenylacrylaldehyde (0.26 mmol, 54.9 mg) and (2-azidoethyl) benzene (0.13 mmol, 19.1 mg) in 200  $\mu\text{L}$  of  $\text{CHCl}_3$  over a course of 48 h at 40  $^\circ\text{C}$ . The crude material was purified by column chromatography on silica gel (eluting with ethyl acetate/hexane = 1:1) to give the desired product [80% yield (28.8 mg)] as a white solid (mp: 60-61  $^\circ\text{C}$ ).

$R_f$  0.20 (ethyl acetate/hexane = 1:1);  $^1\text{H}$  NMR (500 MHz,  $\text{CDCl}_3$ )  $\delta$  10.04 (s, 1H), 7.52 – 7.46 (m, 1H), 7.45 – 7.39 (m, 2H), 7.23 – 7.16 (m, 3H), 7.02 – 6.96 (m, 2H), 6.91 – 6.85 (m, 2H), 4.48 (t,  $J$  = 7.1 Hz, 2H), 3.19 (t,  $J$  = 7.1 Hz, 2H) ppm;  $^{13}\text{C}$  NMR (126 MHz,  $\text{CDCl}_3$ )  $\delta$  184.37, 143.27, 141.02, 136.51, 130.41, 129.42, 128.89, 128.83, 128.68, 127.18, 124.67, 77.16, 49.40, 36.25 ppm; IR (neat) 3061, 2922, 2855, 1684, 1488, 1450, 1434, 1236, 758, 696  $\text{cm}^{-1}$ ; HRMS (ESI) exact mass calcd. for  $\text{C}_{17}\text{H}_{15}\text{N}_3\text{O}$ :  $m/z$  278.1288 ( $[\text{M} + \text{H}]^+$ ), found:  $m/z$  278.1290 ( $[\text{M} + \text{H}]^+$ ).

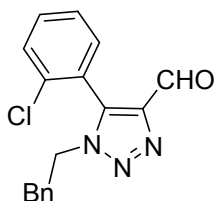

#### 5-(2-Chlorophenyl)-1-phenethyl-1H-1,2,3-triazole-4-carbaldehyde (30)

The compound was prepared according to general procedure with 2-bromo-3-(2-

chlorophenyl)acrylaldehyde (0.26 mmol, 63.8 mg) and (2-azidoethyl) benzene (0.13 mmol, 19.1 mg) in 200  $\mu$ L of  $\text{CHCl}_3$  over a course of 48 h at 40  $^\circ\text{C}$ . The crude material was purified by column chromatography on silica gel (eluting with ethyl acetate/hexane = 1:1) to give the desired product [66% yield (26.7 mg)] a colorless oil.

$R_f$  0.25 (ethyl acetate/hexane = 1:1);  $^1\text{H}$  NMR (500 MHz,  $\text{CDCl}_3$ )  $\delta$  10.06 (t,  $J$  = 1.2 Hz, 1H), 7.54 – 7.48 (m, 1H), 7.48 – 7.41 (m, 1H), 7.29 – 7.15 (m, 4H), 6.92 – 6.82 (m, 2H), 6.66 – 6.58 (m, 1H), 4.64 – 4.51 (m, 1H), 4.23 – 4.12 (m, 1H), 3.29 – 3.20 (m, 1H), 3.18 – 3.05 (m, 1H) ppm;  $^{13}\text{C}$  NMR (126 MHz,  $\text{CDCl}_3$ )  $\delta$  184.3, 144.0, 137.7, 136.5, 133.6, 131.9, 131.7, 130.0, 128.9, 128.7, 127.2, 124.4, 49.7, 36.1 ppm; IR (neat) 3026, 2930, 1697, 1608, 1561, 1471, 1455, 1432, 1083, 730, 698  $\text{cm}^{-1}$ ; HRMS (ESI) exact mass calcd. for  $\text{C}_{17}\text{H}_{14}\text{ClN}_3\text{O}$ :  $m/z$  312.0898 ( $[\text{M} + \text{H}]^+$ ), found:  $m/z$  312.0901 ( $[\text{M} + \text{H}]^+$ ).

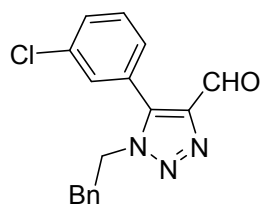

### 5-(3-Chlorophenyl)-1-phenethyl-1H-1,2,3-triazole-4-carbaldehyde (31)

The compound was prepared according to general procedure with 2-bromo-3-(3-chlorophenyl)acrylaldehyde (0.26 mmol, 63.8 mg) and (2-azidoethyl) benzene (0.13 mmol, 19.1 mg) in 200  $\mu$ L of  $\text{CHCl}_3$  over a course of 72 h at 40  $^\circ\text{C}$ . The crude material was purified by column chromatography on silica gel (eluting with ethyl acetate/hexane = 1:1) to give the desired product [81% yield (32.8 mg)] as a colorless oil.

$R_f$  0.20 (ethyl acetate/hexane = 1:1);  $^1\text{H}$  NMR (500 MHz,  $\text{CDCl}_3$ )  $\delta$  10.05 (s, 1H), 7.45 – 7.41 (m, 1H), 7.33 (t,  $J$  = 7.9 Hz, 1H), 7.25 – 7.17 (m, 3H), 6.87 – 6.80 (m, 3H), 6.75 (t,  $J$  = 1.9 Hz, 1H), 4.47 (t,  $J$  = 6.8 Hz, 2H), 3.21 (t,  $J$  = 6.7 Hz, 2H) ppm;  $^{13}\text{C}$  NMR (126 MHz,  $\text{CDCl}_3$ )  $\delta$  184.4, 143.3, 139.4, 136.3, 134.8, 130.5, 130.1, 129.4, 128.9, 128.7, 127.6,

127.3, 126.4, 49.6, 36.3 ppm; IR (neat) 3026, 2959, 2847, 1697, 1555, 1455, 1298, 825, 730, 698  $\text{cm}^{-1}$ ; HRMS (ESI) exact mass calcd. for  $\text{C}_{17}\text{H}_{14}\text{ClN}_3\text{O}$ :  $m/z$  312.0898 ( $[\text{M} + \text{H}]^+$ ), found:  $m/z$  312.0897 ( $[\text{M} + \text{H}]^+$ ).

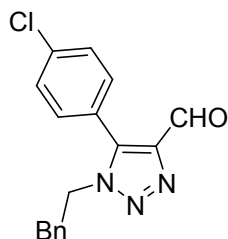

**5-(4-Chlorophenyl)-1-phenethyl-1H-1,2,3-triazole-4-carbaldehyde (32)**

The compound was prepared according to general procedure with 3-bromo-3-(4-chlorophenyl)acrylaldehyde (0.26 mmol, 63.8 mg) and (2-azidoethyl) benzene (0.13 mmol, 19.1 mg) in 200  $\mu\text{L}$  of  $\text{CHCl}_3$  over a course of 72 h at 40  $^\circ\text{C}$ . The crude material was purified by column chromatography on silica gel (eluting with ethyl acetate/hexane = 1:1) to give the desired product [82% yield (33.2 mg)] as a white solid (mp: 135-136  $^\circ\text{C}$ , decomposed).

$R_f$  0.20 (ethyl acetate/hexane = 1:1);  $^1\text{H}$  NMR (500 MHz,  $\text{CDCl}_3$ )  $\delta$  10.06 (s, 1H), 7.36 (d,  $J$  = 8.4 Hz, 1H), 7.26 – 7.14 (m, 4H), 6.96 – 6.74 (m, 4H), 4.47 (t,  $J$  = 6.8 Hz, 2H), 3.21 (t,  $J$  = 6.8 Hz, 2H) ppm;  $^{13}\text{C}$  NMR (126 MHz,  $\text{CDCl}_3$ )  $\delta$  184.55, 143.27, 139.69, 136.76, 136.45, 130.80, 129.18, 128.91, 128.72, 127.30, 123.09, 77.41, 77.16, 76.91, 49.50, 36.29 ppm; IR (neat) 3034, 2928, 2853, 1690, 1604, 1487, 1453, 1259, 1234, 1091, 839, 751, 703  $\text{cm}^{-1}$ ; HRMS (ESI) exact mass calcd. for  $\text{C}_{17}\text{H}_{14}\text{ClN}_3\text{O}$ :  $m/z$  312.0898 ( $[\text{M} + \text{H}]^+$ ), found:  $m/z$  312.0900 ( $[\text{M} + \text{H}]^+$ ).

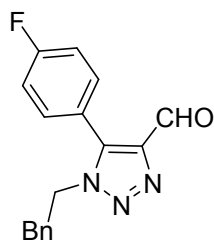



### 5-(4-Fluorophenyl)-1-phenethyl-1*H*-1,2,3-triazole-4-carbaldehyde (33)

The compound was prepared according to general procedure with 3-bromo-3-(4-fluorophenyl)acrylaldehyde (0.26 mmol, 59.5 mg) and (2-azidoethyl) benzene (0.13 mmol, 19.1 mg) in 200  $\mu$ L of  $\text{CHCl}_3$  over a course of 72 h at 40  $^\circ\text{C}$ . The crude material was purified by column chromatography on silica gel (eluting with ethyl acetate/hexane = 1:1) to give the desired product [61% yield (23.4 mg)] as a light yellow solid (mp: 96-98  $^\circ\text{C}$ ).

$R_f$  0.25 (ethyl acetate/hexane = 1:1);  $^1\text{H}$  NMR (500 MHz,  $\text{CDCl}_3$ )  $\delta$  10.08 (s, 1H), 7.26 – 7.18 (m, 3H), 7.13 – 7.06 (m, 2H), 6.94 – 6.90 (m, 2H), 6.89 – 6.86 (m, 2H), 4.48 (t,  $J$  = 6.9 Hz, 2H), 3.22 (t,  $J$  = 6.9 Hz, 2H) ppm;  $^{13}\text{C}$  NMR (126 MHz,  $\text{CDCl}_3$ )  $\delta$  184.6, 163.8 (d,  $J_{\text{CF}}$  = 252 Hz), 143.3, 139.9, 136.5, 131.6 (d,  $J_{\text{CF}}$  = 8.8 Hz), 128.9, 128.7, 127.3, 120.7 (d,  $J_{\text{CF}}$  = 2.5 Hz), 116.2 (d,  $J_{\text{CF}}$  = 22.7 Hz), 49.5, 36.3 ppm; IR (neat) 3034, 2924, 2853, 1690, 1604, 1499, 1453, 1221, 1160, 842, 755, 704  $\text{cm}^{-1}$ ; HRMS (ESI) exact mass calcd. for  $\text{C}_{17}\text{H}_{14}\text{FN}_3\text{O}$ :  $m/z$  296.1194 ( $[\text{M} + \text{H}]^+$ ), found:  $m/z$  296.1194 ( $[\text{M} + \text{H}]^+$ ).

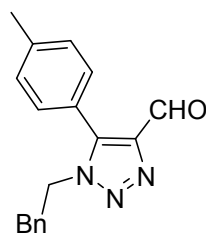

### 1-Phenethyl-5-(p-tolyl)-1*H*-1,2,3-triazole-4-carbaldehyde (34)

The compound was prepared according to general procedure with 3-bromo-3-(p-tolyl)acrylaldehyde (0.26 mmol, 58.5 mg) and (2-azidoethyl) benzene (0.13 mmol, 19.1 mg) in 200  $\mu$ L of  $\text{CHCl}_3$  over a course of 72 h at room temperature. The crude material was purified by column chromatography on silica gel (eluting with ethyl acetate/hexane = 1:1) to give the desired product [76% yield (28.8 mg)] as a white solid (mp: 90-92  $^\circ\text{C}$ ).

$R_f$  0.20 (ethyl acetate/hexane = 1:1);  $^1\text{H}$  NMR (500 MHz,  $\text{CDCl}_3$ )  $\delta$  10.04 (s, 1H), 7.27 – 7.18 (m,

5H), 6.94 – 6.85 (m, 4H), 4.48 (t,  $J = 7.2$  Hz, 2H), 3.19 (t,  $J = 7.2$  Hz, 2H), 2.41 (s, 3H) ppm;  $^{13}\text{C}$  NMR (126 MHz,  $\text{CDCl}_3$ )  $\delta$  184.4, 143.3, 141.2, 140.8, 136.6, 129.6, 129.3, 128.8, 128.7, 127.2, 121.6, 49.3, 36.2, 21.5 ppm; IR (neat) 3030, 2922, 2859, 1691, 1502, 1450, 1435, 1300, 1236, 832, 752, 701  $\text{cm}^{-1}$ ; HRMS (ESI) exact mass calcd. for  $\text{C}_{18}\text{H}_{17}\text{N}_3\text{O}$ :  $m/z$  292.1444 ( $[\text{M} + \text{H}]^+$ ), found:  $m/z$  292.1446 ( $[\text{M} + \text{H}]^+$ ).

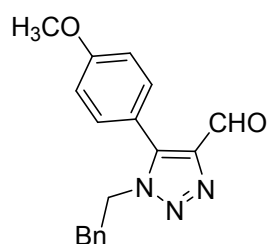

#### 5-(4-Methoxyphenyl)-1-phenethyl-1H-1,2,3-triazole-4-carbaldehyde (35)

The compound was prepared according to general procedure with 2-bromo-3-cyclohexylacrylaldehyde (0.26 mmol, 62.7 mg) and (2-azidoethyl) benzene (0.13 mmol, 19.1 mg) in 200  $\mu\text{L}$  of  $\text{CHCl}_3$  over a course of 48 h at 50  $^\circ\text{C}$ . The crude material was purified by column chromatography on silica gel (eluting with ethyl acetate/hexane = 1:1) to give the desired product [44% yield (17.6 mg)] as a colorless oil.

$R_f$  0.25 (ethyl acetate/hexane = 1:1);  $^1\text{H}$  NMR (500 MHz,  $\text{CDCl}_3$ )  $\delta$  10.06 (s, 1H), 7.24 – 7.19 (m, 3H), 7.00 – 6.88 (m, 6H), 4.49 (t,  $J = 7.1$  Hz, 2H), 3.86 (s, 3H), 3.20 (t,  $J = 7.1$  Hz, 2H) ppm;  $^{13}\text{C}$  NMR (126 MHz,  $\text{CDCl}_3$ )  $\delta$  184.7, 161.2, 143.3, 141.0, 136.7, 131.0, 128.9, 128.8, 127.3, 116.5, 114.5, 55.5, 49.4, 36.3 ppm; IR (neat) 3030, 2936, 1696, 1611, 1500, 1455, 1295, 1251, 1177, 1024, 839, 698  $\text{cm}^{-1}$ ; HRMS (ESI) exact mass calcd. for  $\text{C}_{18}\text{H}_{17}\text{N}_3\text{O}_2$ :  $m/z$  303.1213 ( $[\text{M} + \text{Na}]^+$ ), found:  $m/z$  303.1213 ( $[\text{M} + \text{Na}]^+$ ).

## 6. Synthetic Transformations of 4-Formyl-1,2,3-Triazole

Gram-scale synthesis of compound **25**.

To a stirred solution of  $\alpha$ -brom- $\beta$ -ethyl acrolein (1.63 g, 10 mmol) in 10 mL of  $\text{CHCl}_3$ , was added phenethyl azide (1.03 g, 7 mmol) dropwise at RT in room temperature water bath over a course of 20 min. The mixture was slowly warmed to room temperature and stirred for another 48 h, then  $\text{Et}_3\text{N}$  (1.11 mL, 8 mmol) was added slowly. Five min later, reaction mixture was condensed under reduced pressure and crude material was purified by column chromatography on silica gel (eluting with ethyl acetate/hexane = 1:1) to give the desired product [79% yield (1.268 g)] as a colorless oil.

**(a) Preparation of (5-ethyl-1-phenethyl-1*H*-1,2,3-triazol-4-yl)methanol (**37**)**

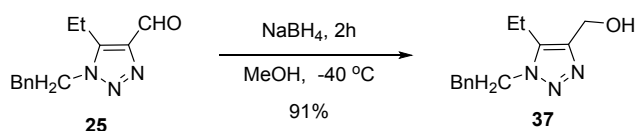

To a stirred solution of compound **25** (22.93 mg, 0.1 mmol) in methanol (2 mL) was added  $\text{NaBH}_4$  (5.7 mg, 0.15 mmol) at  $-40\text{ }^\circ\text{C}$ . The reaction mixture was warmed to  $0\text{ }^\circ\text{C}$  and stirred for 1 h. The reaction solution was then quenched with aqueous  $\text{NH}_4\text{Cl}$  and extracted with  $\text{CH}_2\text{Cl}_2$ . The organic layer was dried over anhydrous  $\text{Na}_2\text{SO}_4$  and concentrated under reduced pressure. The residue was purified by column chromatography on silica gel to give the title alcohol **37** as a colorless oil [95% yield (21.9 mg)] a colorless oil.

$R_f$  0.20 (ethyl acetate/hexane = 1:1);  $^1\text{H}$  NMR (500 MHz,  $\text{CDCl}_3$ )  $\delta$  7.32 – 7.20 (m, 3H), 7.11 – 7.05 (m, 2H), 4.70 (s, 2H), 4.41 (t,  $J$  = 7.5 Hz, 2H), 3.31 – 3.17 (m, 3H), 2.48 (q,  $J$  = 7.6 Hz, 2H), 1.07 (t,  $J$  = 7.6 Hz, 3H) ppm;  $^{13}\text{C}$  NMR (126 MHz,  $\text{CDCl}_3$ )  $\delta$  143.8, 137.4, 136.5, 128.9, 128.8, 127.2, 55.9, 49.3, 36.9, 15.8, 13.7 ppm; IR (neat) 3318, 3030, 2934, 1604, 1495, 1454, 1232, 1016, 751, 699  $\text{cm}^{-1}$ ; HRMS (ESI) exact mass calcd. for  $\text{C}_{13}\text{H}_{17}\text{N}_3\text{O}$ :  $m/z$  232.1444 ( $[\text{M} + \text{H}]^+$ ), found:  $m/z$  232.1444 ( $[\text{M} + \text{H}]^+$ ).

**(b) Preparation of 5-ethyl-1-phenethyl-1*H*-1,2,3-triazole-4-carboxylic acid (**38**)**

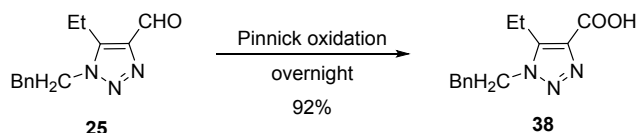

A mixture of compound **25** (50.0 mg, 0.22 mmol),  $\text{NaH}_2\text{PO}_4 \cdot \text{H}_2\text{O}$  (207 mg, 1.5 mmol), sodium chlorite (80% purity, 62 mg, 0.55 mmol), THF (4 mL), water (6.0 mL), *t*-BuOH (1.5 mL), and 2-methyl-2-butene (2.0 mL of 2.0 M in THF) was stirred vigorously for 1 hour at  $-10^\circ\text{C}$ . Then the mixture was warmed to room temperature and stirred for another 2 h. The mixture was then diluted with water (10 mL) and extracted with  $\text{CH}_2\text{Cl}_2$  ( $4 \times 20$  mL). The combined organic extract was dried over anhydrous  $\text{Na}_2\text{SO}_4$  and concentrated *in vacuo*. The residue was purified by flash column chromatography on silica gel to give product **38** [91% yield (49.3 mg)] as a white solid (mp:  $80\text{--}82^\circ\text{C}$ ).

$R_f$  0.15 (ethyl acetate/hexane = 1:1);  $^1\text{H}$  NMR (500 MHz,  $\text{CDCl}_3$ )  $\delta$  8.83 (br, 1H), 7.33 – 7.17 (m, 3H), 7.11 – 6.97 (m, 2H), 4.49 (t,  $J = 7.2$  Hz, 2H), 3.27 (t,  $J = 7.2$  Hz, 2H), 2.72 (q,  $J = 7.6$  Hz, 2H), 1.03 (t,  $J = 7.6$  Hz, 3H) ppm;  $^{13}\text{C}$  NMR (126 MHz,  $\text{CDCl}_3$ )  $\delta$  164.8, 144.8, 136.8, 135.0, 129.0, 128.8, 127.3, 49.5, 36.6, 16.4, 12.9 ppm; IR (neat) 3461, 3026, 2935, 1694, 1569, 1467, 1274, 1255, 1217, 1023, 760, 703  $\text{cm}^{-1}$ ; HRMS (ESI) exact mass calcd. for  $\text{C}_{13}\text{H}_{15}\text{N}_3\text{O}_2$ :  $m/z$  246.1237 ( $[\text{M} + \text{H}]^+$ ), found:  $m/z$  246.1241 ( $[\text{M} + \text{H}]^+$ ).

**(c) Preparation of N'-((5-ethyl-1-phenethyl-1H-1,2,3-triazol-4-yl)methylene)benzohydrazide (39)**

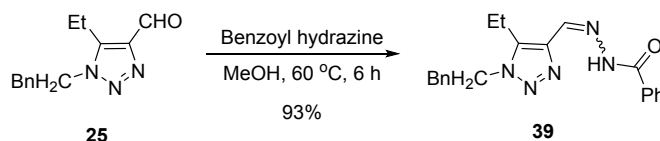

To a stirred solution of compound **25** (22.9 mg, 0.10 mmol) in methanol (1.0 mL) was added benzoyl hydrazine (13.6 mg, 0.10 mmol). The reaction mixture was warmed to  $60^\circ\text{C}$  and stirred at this temperature for 6 h. Solvent was removed under reduced pressure, and the residue was washed with cold ethanol (1.0 mL) and cold diethyl ether (1.0 mL) to give the product **39** [93%

yield (32.4 mg)] as a white solid. It was a mixtures of isomers with the *E/Z* in 2.3:1 ratio.

*E* isomer: *R<sub>f</sub>* 0.70 (ethyl acetate/methanol = 20:1), <sup>1</sup>H NMR (500 MHz, DMSO) δ 12.09 (s, 1H), 8.72 (s, 1H), 8.06 – 7.85 (m, 2H), 7.63 – 7.48 (m, 3H), 7.31 – 7.12 (m, 5H), 4.57 (t, *J* = 7.1 Hz, 2H), 3.19 (t, *J* = 7.1 Hz, 2H), 2.80 (q, *J* = 7.4 Hz, 2H), 1.01 (t, *J* = 7.5 Hz, 3H) ppm; <sup>13</sup>C NMR (126 MHz, DMSO) δ 162.9, 141.2, 138.9, 138.2, 137.6, 133.5, 131.7, 128.8, 128.5, 128.4, 127.5, 126.6, 48.3, 35.7, 15.8, 12.3 ppm; IR (neat) 3220, 3030, 2936, 1648, 1549, 1271, 1147, 1025, 693 cm<sup>-1</sup>; HRMS (ESI) exact mass calcd. for C<sub>20</sub>H<sub>21</sub>N<sub>5</sub>O: *m/z* 348.1819 ([*M* + *H*]<sup>+</sup>), found: *m/z* 348.1820 ([*M* + *H*]<sup>+</sup>).

*Z* isomer: *R<sub>f</sub>* 0.50 (ethyl acetate/methanol = 20:1), <sup>1</sup>H NMR (500 MHz, DMSO) δ 13.43 (s, 1H), 7.98 – 7.89 (m, 2H), 7.69 – 7.59 (m, 4H), 7.32 – 7.15 (m, 5H), 4.66 (t, *J* = 7.1 Hz, 2H), 3.23 (t, *J* = 7.1 Hz, 2H), 2.79 (q, *J* = 7.6 Hz, 2H), 1.00 (t, *J* = 7.6 Hz, 3H) ppm; <sup>13</sup>C NMR (126 MHz, DMSO) δ 162.7, 140.7, 138.3, 137.3, 132.9, 132.3, 131.5, 129.1, 128.8, 128.5, 127.0, 126.8, 48.9, 35.4, 14.7, 13.7 ppm; IR (neat) 3224, 3029, 2975, 1681, 1557, 1486, 1277, 1027, 696, 688 cm<sup>-1</sup>.

#### (d) Preparation of N-benzyl-1-(5-ethyl-1-phenethyl-1*H*-1,2,3-triazol-4-yl)methanamine (40)

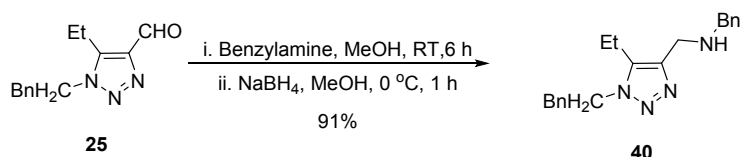

To a stirred solution of compound **25** (22.9 mg, 0.10 mmol) in anhydrous methanol (1.0 mL) was added benzylamine (15.0 mg, 0.14 mmol) under argon at room temperature. After stirring for 6 h at RT, the reaction mixture was allowed to cool to 0 °C and NaBH<sub>4</sub> (5 mg, 0.14 mmol) was added. After an additional 1 h at 0 °C, reaction was quenched with aqueous NH<sub>4</sub>Cl (3.0 mL). The mixture was then diluted with water (15 mL) and extracted with CH<sub>2</sub>Cl<sub>2</sub> (3 × 20 mL). The combined organic extracts were dried over anhydrous Na<sub>2</sub>SO<sub>4</sub>, and the solvent was removed under reduced

pressure. The residue was purified by flash column chromatography on silica gel to give product **40** [91% yield (29.0 mg)] as a light yellow solid.

$R_f$  0.30 (ethyl acetate/methanol = 20:1),  $^1\text{H}$  NMR (500 MHz,  $\text{CDCl}_3$ )  $\delta$  7.37 – 7.14 (m, 8H), 7.12 – 7.00 (m, 2H), 4.40 (t,  $J$  = 7.6 Hz, 2H), 3.82 (s, 2H), 3.80 (s, 2H), 3.55 (br, 1H), 3.22 (t,  $J$  = 7.4 Hz, 2H), 2.41 (q,  $J$  = 7.6 Hz, 2H), 1.00 (t,  $J$  = 7.6 Hz, 3H) ppm;  $^{13}\text{C}$  NMR (126 MHz,  $\text{CDCl}_3$ )  $\delta$  142.4, 140.0, 137.5, 136.0, 128.9, 128.5, 128.4, 127.1, 127.1, 53.2, 49.3, 43.5, 37.0, 15.8, 13.6 ppm; IR (neat) 3318, 3028, 2928, 1735, 1453, 1241, 1167, 1045, 1028, 731, 698  $\text{cm}^{-1}$ ; HRMS (ESI) exact mass calcd. for  $\text{C}_{20}\text{H}_{24}\text{N}_4\text{O}$ :  $m/z$  321.2074 ( $[\text{M} + \text{H}]^+$ ), found:  $m/z$  321.2077 ( $[\text{M} + \text{H}]^+$ ).

**(e) Preparation of N-benzyl-1-(5-ethyl-1-phenethyl-1*H*-1,2,3-triazol-4-yl)methanimine oxide (41)**

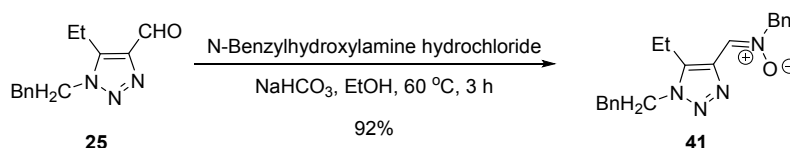

To a stirred solution of compound **25** (22.9 mg, 0.10 mmol) in absolute ethanol (5 mL) was added N-benzylhydroxylamine hydrochloride (23.8 mg, 1.5 mmol) and sodium bicarbonate (12.6 mg, 1.5 mmol). The reaction mixture was heated to 60 °C and stirred for 3 h. Solvent was removed under vacuum, and the residue was diluted with  $\text{H}_2\text{O}$  (10 mL) and extracted with  $\text{CH}_2\text{Cl}_2$  ( $3 \times 20$  mL). The combined organic extracts were dried over anhydrous  $\text{Na}_2\text{SO}_4$ , and the solvent was removed under reduced pressure. The residue was purified by flash column chromatography on silica gel to give product **41** [91% yield (30.8 mg)] as a light yellow solid.

$R_f$  0.50 (ethyl acetate/methanol = 20:1),  $^1\text{H}$  NMR (500 MHz, DMSO)  $\delta$  8.20 (s, 1H), 7.53 – 7.47 (m, 2H), 7.43 – 7.33 (m, 3H), 7.29 – 7.23 (m, 2H), 7.23 – 7.18 (m, 1H), 7.17 – 7.13 (m, 2H), 5.09 (s, 2H), 4.53 (t,  $J$  = 7.2 Hz, 2H), 3.14 (t,  $J$  = 7.2 Hz, 2H), 2.89 (q,  $J$  = 7.5 Hz, 2H), 0.78 (t,  $J$  = 7.4 Hz, 3H) ppm;  $^{13}\text{C}$  NMR (126 MHz, DMSO)  $\delta$  139.0, 137.5, 135.8, 134.6, 129.0, 128.8, 128.4, 128.3, 128.3, 126.6, 126.5, 68.6, 48.4, 35.6, 17.0, 14.2 ppm; IR (neat) 3029, 2930, 1610, 1496, 1455, 1143, 755, 700  $\text{cm}^{-1}$ ; HRMS (ESI) exact mass calcd. for  $\text{C}_{20}\text{H}_{22}\text{N}_4\text{O}$ :  $m/z$  335.1866 ( $[\text{M} +$

H]<sup>+</sup>), found: m/z 335.1864 ([M + H]<sup>+</sup>).

**(f) Preparation of 5-ethyl-1-phenethyl-4-vinyl-1H-1,2,3-triazole (42)**<sup>[3]</sup>

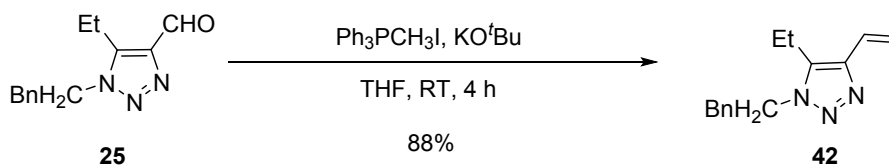

A solution of methyltriphenylphosphonium iodide (53.8 mg, 0.13 mmol) and KO<sup>t</sup>Bu (33.3 mg, 0.30 mmol) in dry THF (0.3 mL) was stirred at 0 °C for 2 h. Then aldehyde **25** (22.9 mg, 0.10 mmol) in dry THF (1 mL) was added dropwise. Then the mixture was allowed warm to room temperature and stirred for 4 h. The reaction was terminated with diethyl ether (10 mL) and poured into ice-water (10 mL) and extracted with diethyl ether twice. The organic layers were dried over anhydrous Na<sub>2</sub>SO<sub>4</sub> and evaporated under reduced pressure. The crude product was purified by silica gel column chromatography, to give product **42** [88% yield (20.0 mg)] as a light yellow liquid.

*R*<sub>f</sub> 0.20 (ethyl acetate/hexane = 1:1); <sup>1</sup>H NMR (500 MHz, CDCl<sub>3</sub>) δ 7.33 – 7.18 (m, 3H), 7.13 – 7.04

(m, 2H), 6.59 (dd, *J* = 17.6, 11.3 Hz, 1H), 5.97 (dd, *J* = 17.6, 1.5 Hz, 1H), 5.31 (dd, *J* = 11.3, 1.5 Hz,

1H), 4.41 (t, *J* = 7.4 Hz, 2H), 3.23 (t, *J* = 7.4 Hz, 2H), 2.45 (q, *J* = 7.6 Hz, 2H), 1.01 (t, *J* = 7.6 Hz, 3H) ppm; <sup>13</sup>C NMR (126 MHz, CDCl<sub>3</sub>) δ 141.9, 137.5, 135.2, 128.9, 128.9, 127.2, 125.1, 115.1,

77.2, 49.2, 37.0, 15.8, 13.4 ppm; IR (neat) 3028, 2973, 2932, 1454, 1239, 1011, 985, 722, 699 cm<sup>-1</sup>; HRMS (ESI) exact mass calcd. for C<sub>14</sub>H<sub>17</sub>N<sub>3</sub>: m/z 228.1495 ([M + H]<sup>+</sup>), found: m/z 228.1497 ([M + H]<sup>+</sup>).

[3] H-C. Tsai, Y-H. Huang, C-M. Chou, *Org. Lett.*, **2018**, *20*, 1328.

## 7. $^1\text{H}$ NMR and $^{13}\text{C}$ NMR Spectra

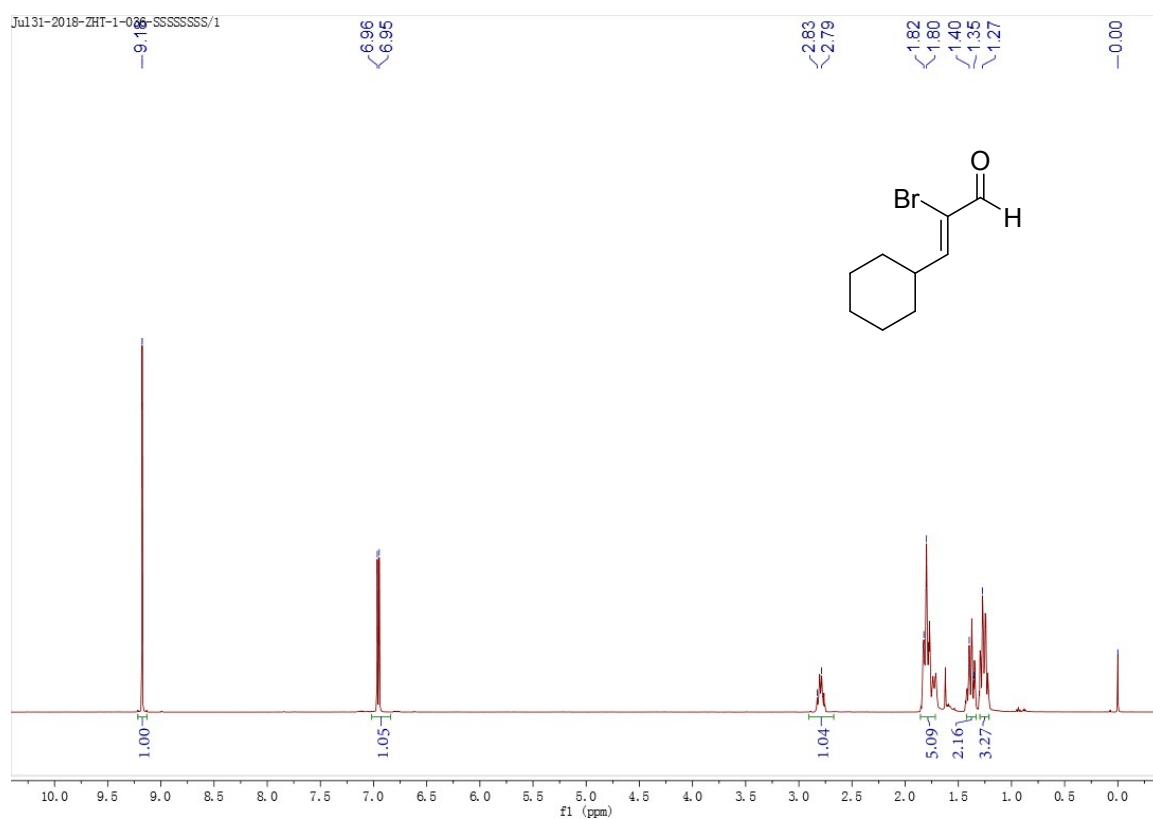



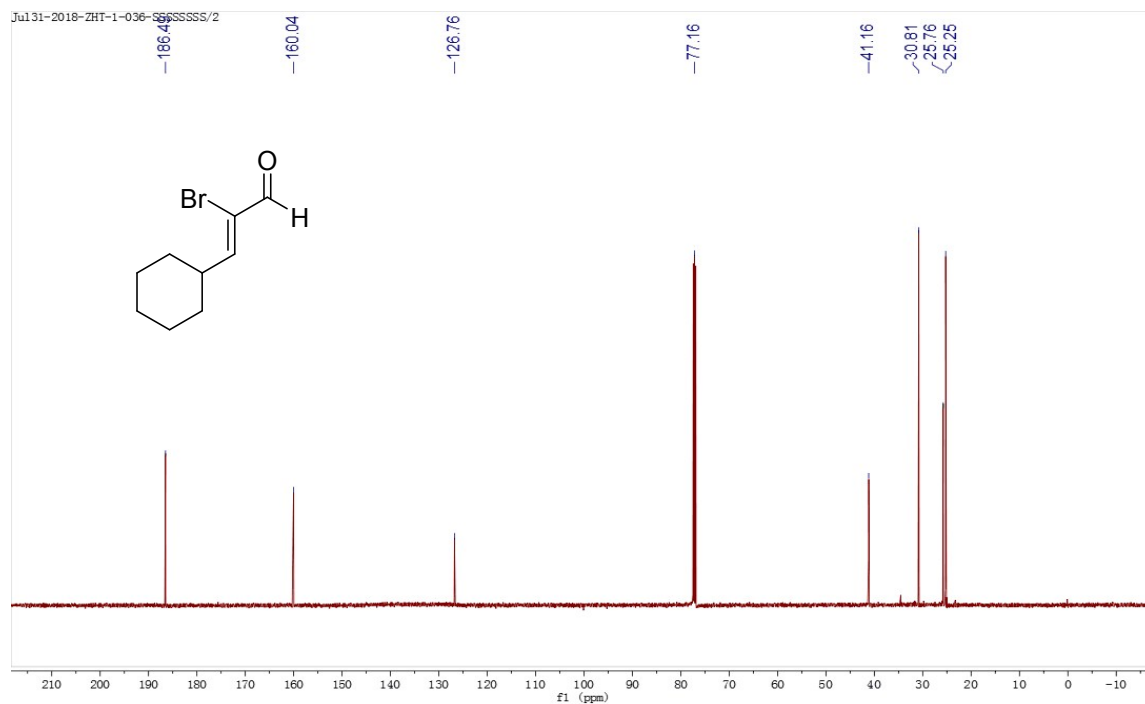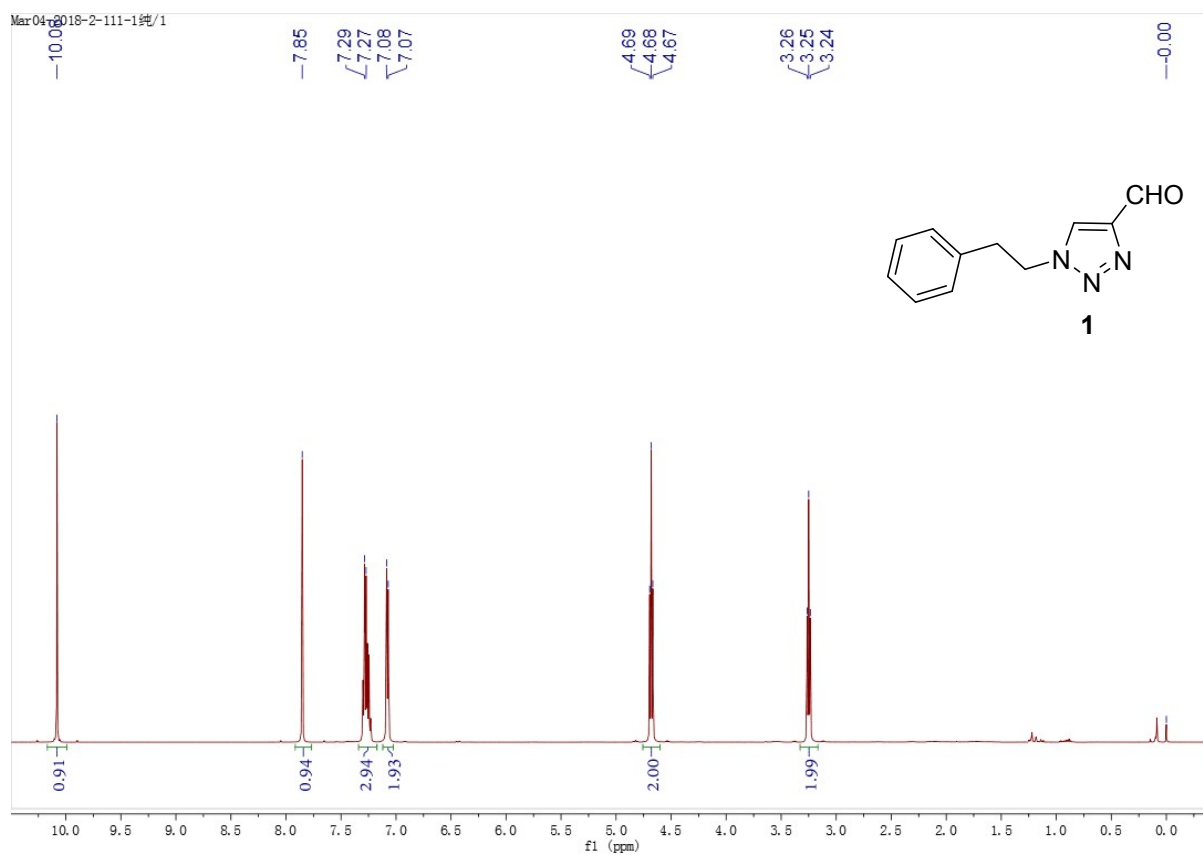

S33

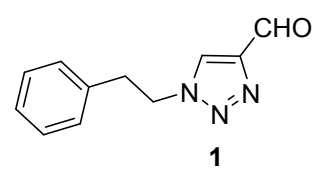

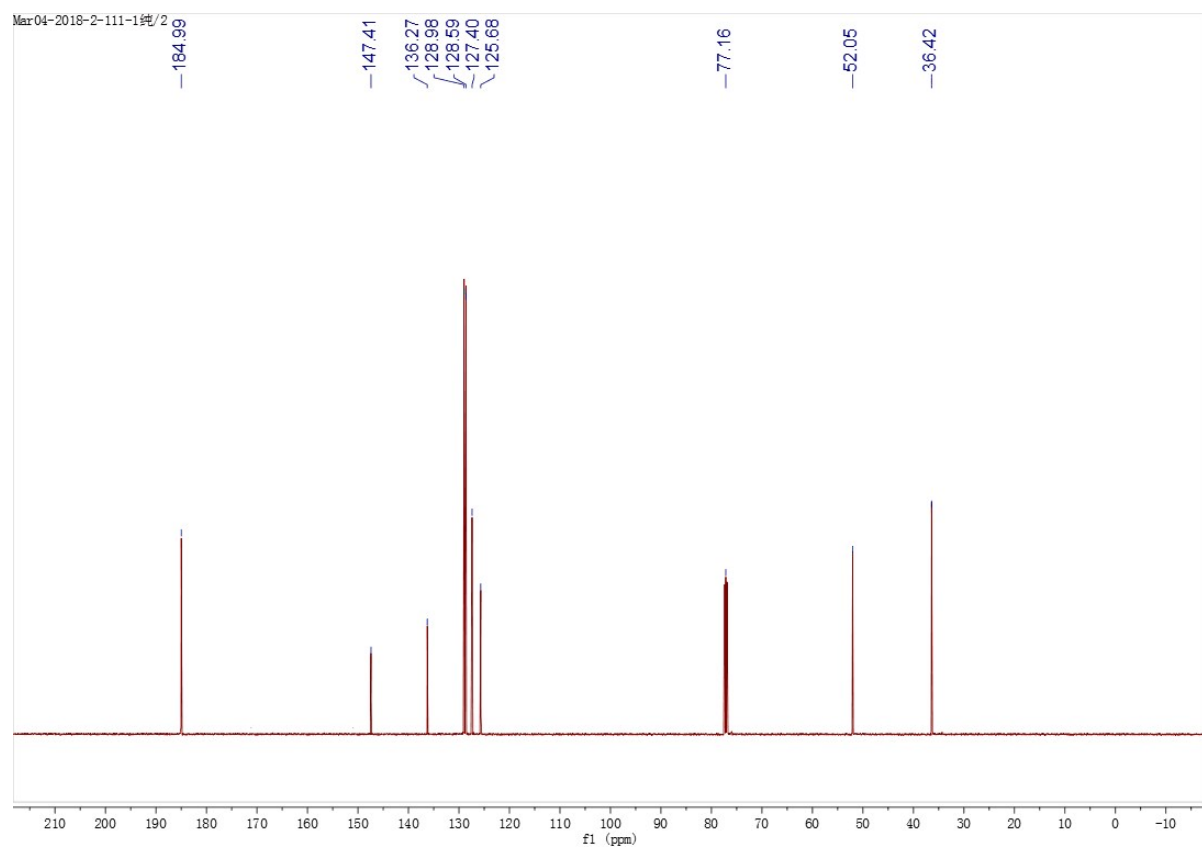

Apr 24-2018-ssz-2-012/1

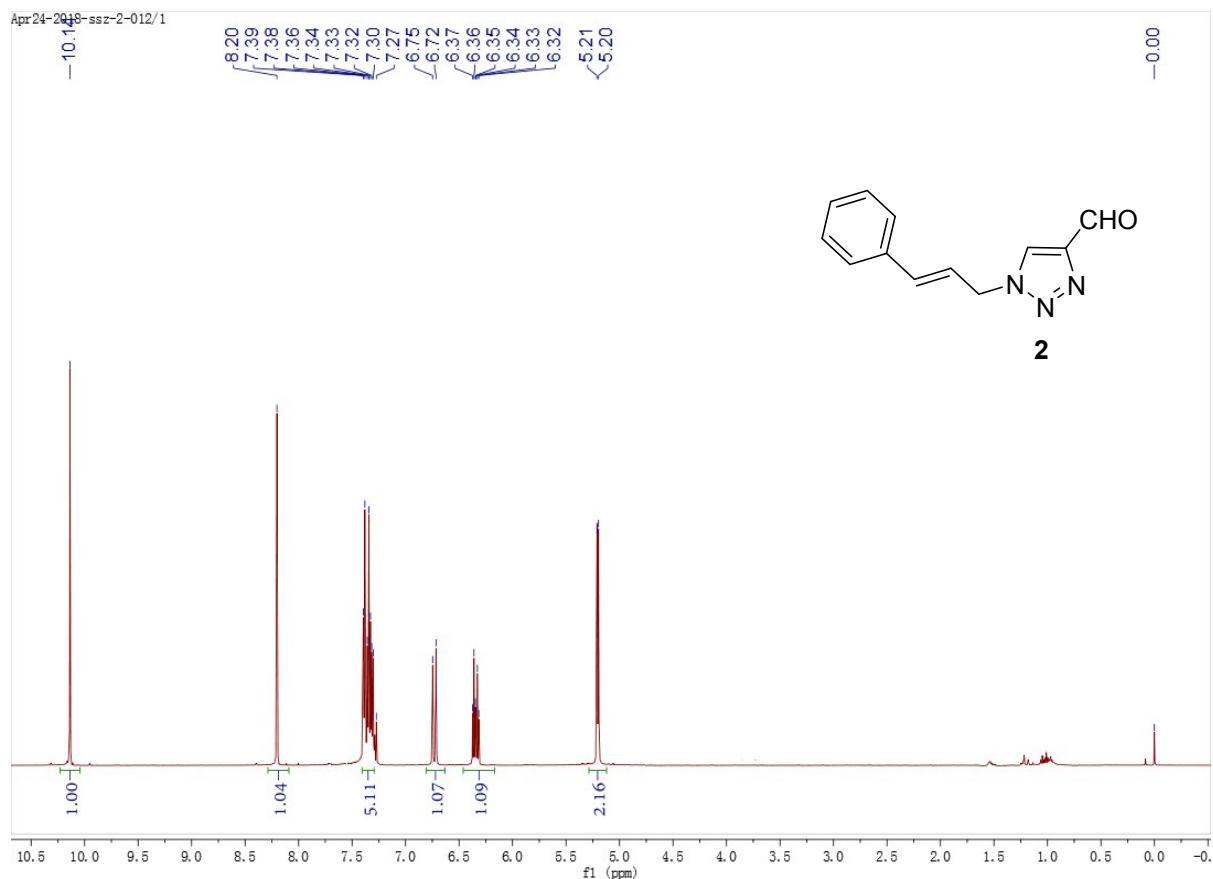

May 02-2018-SSZ-2-12CNMR/1

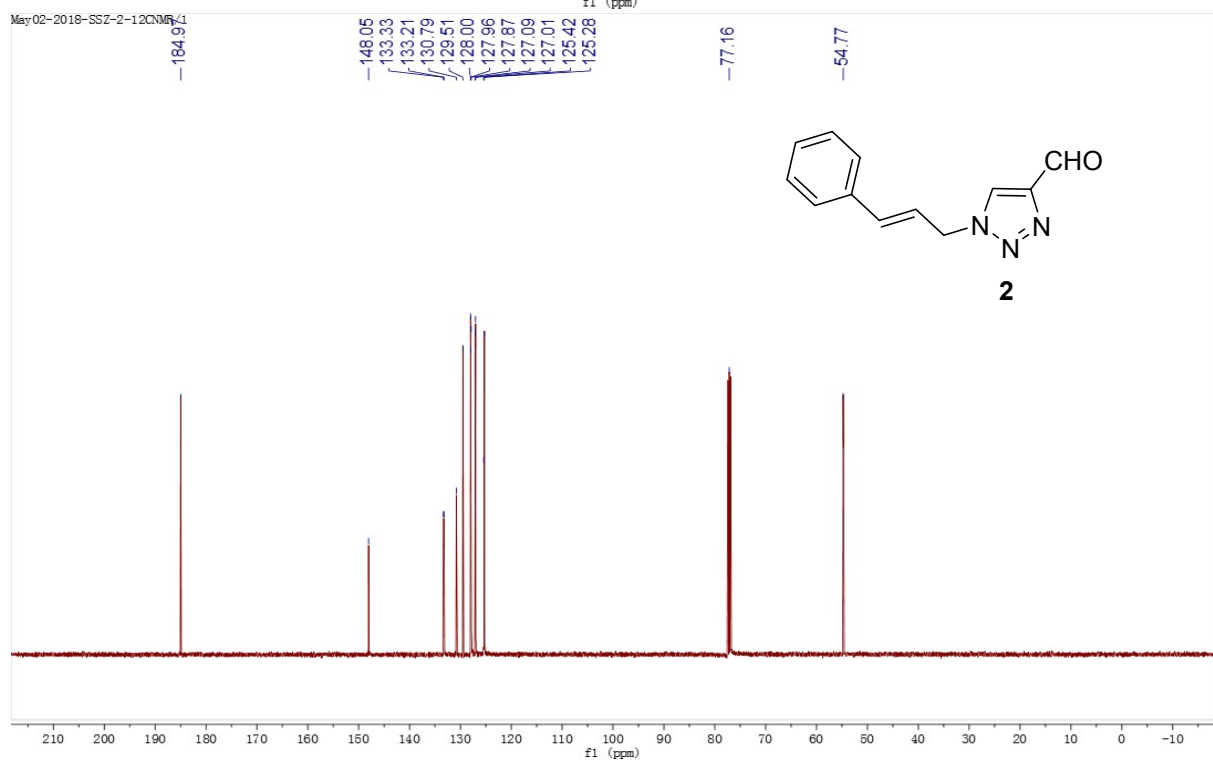

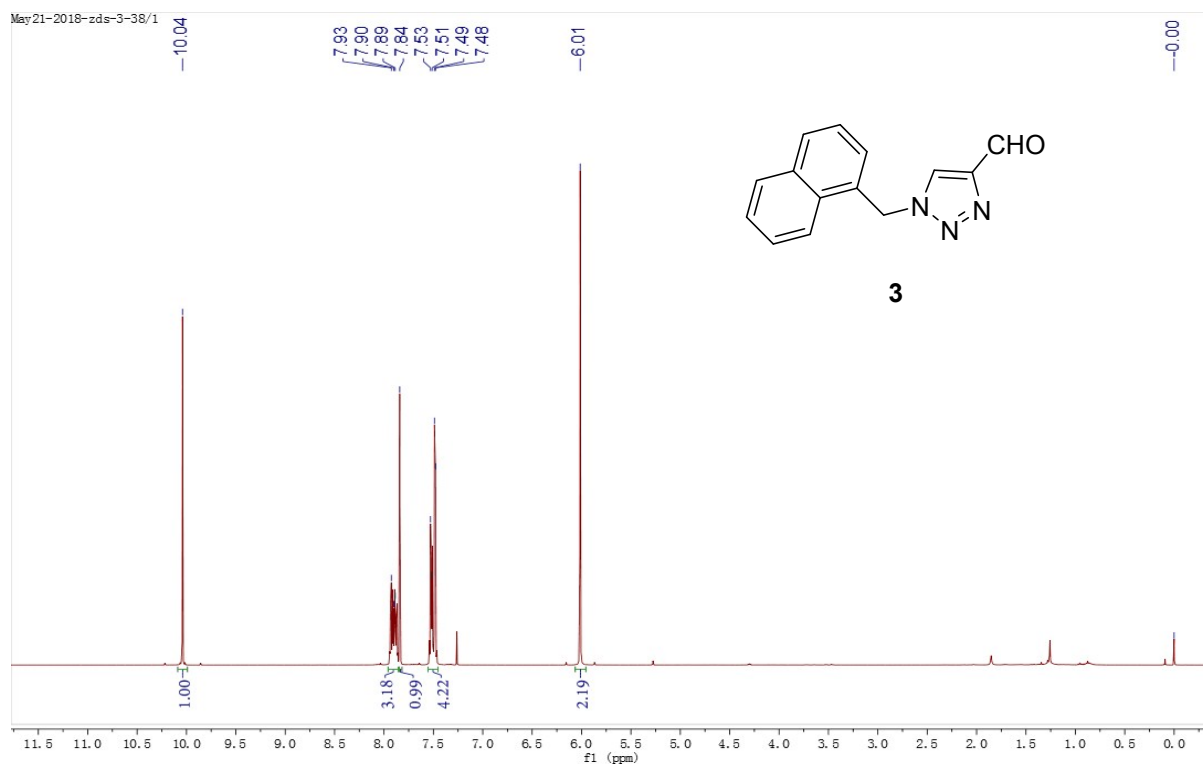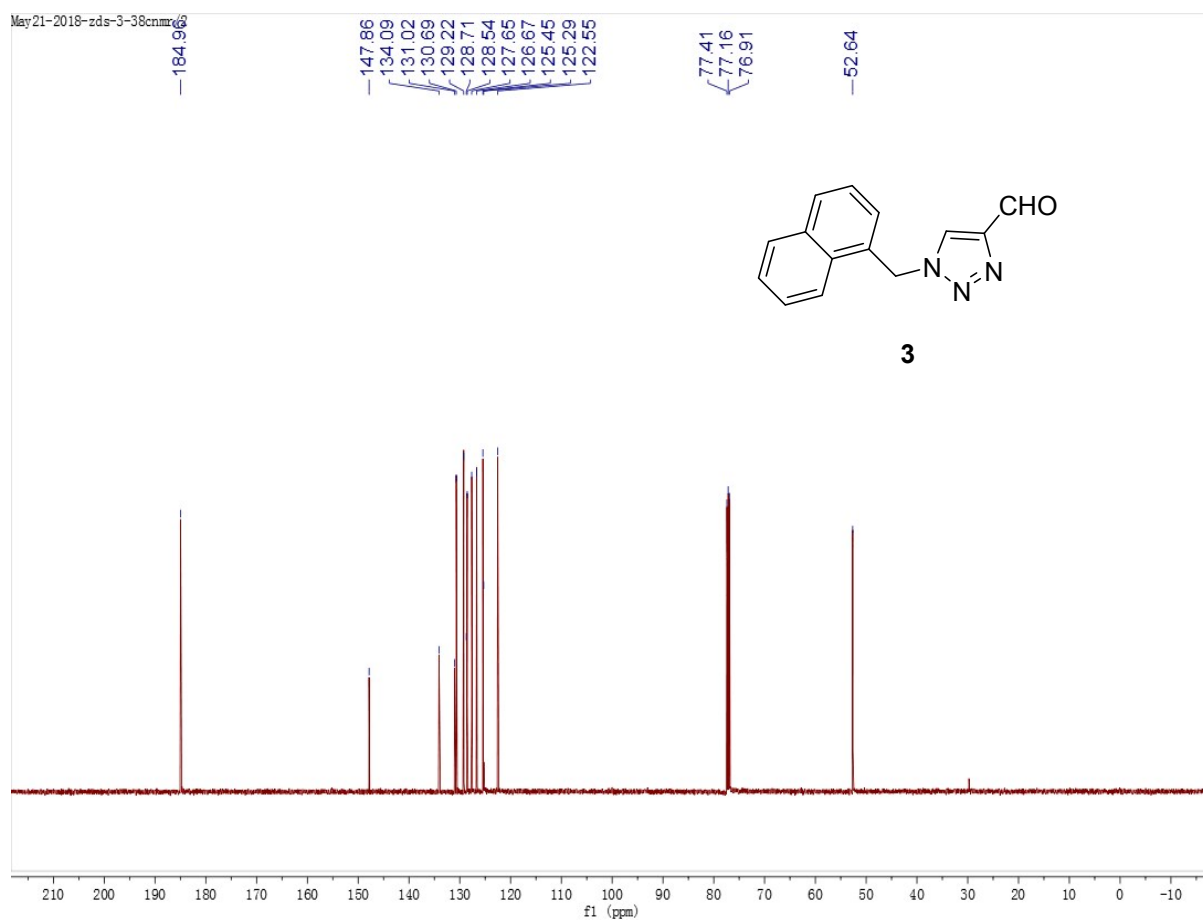

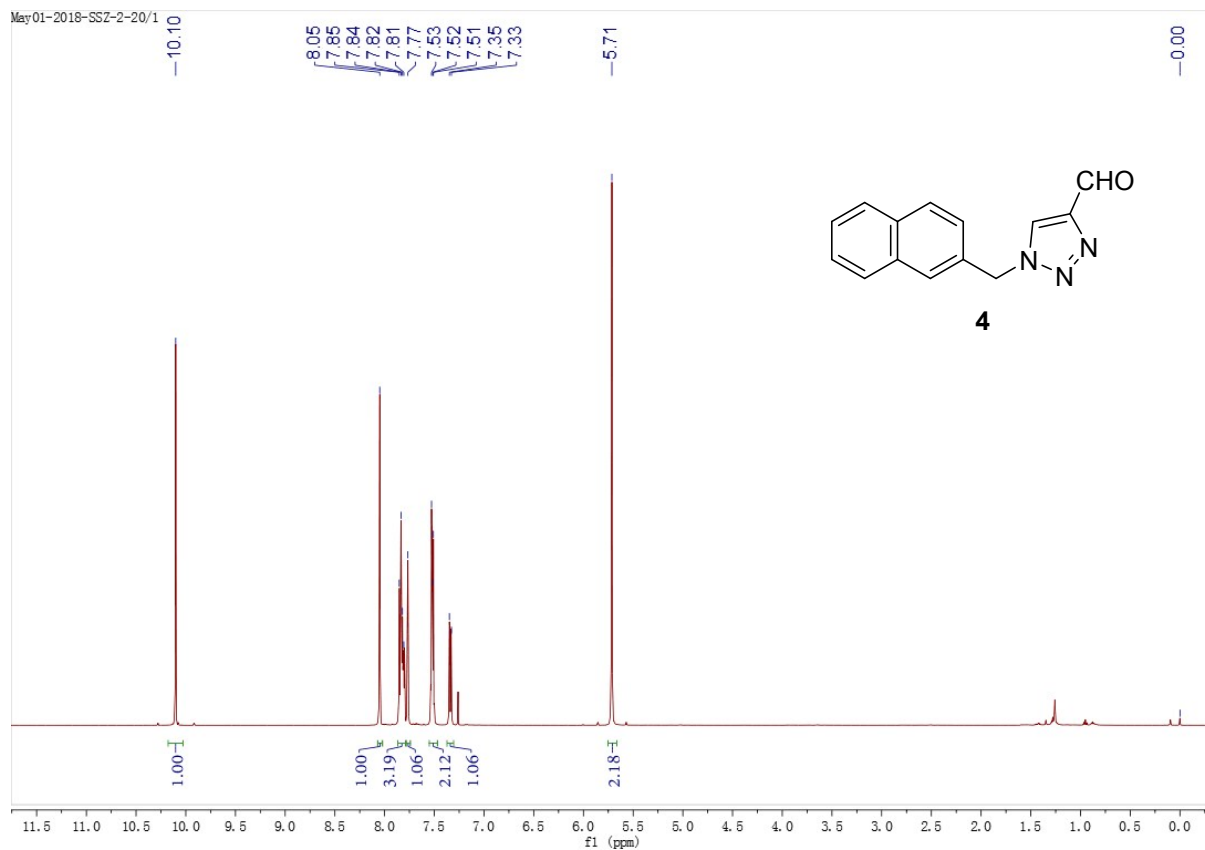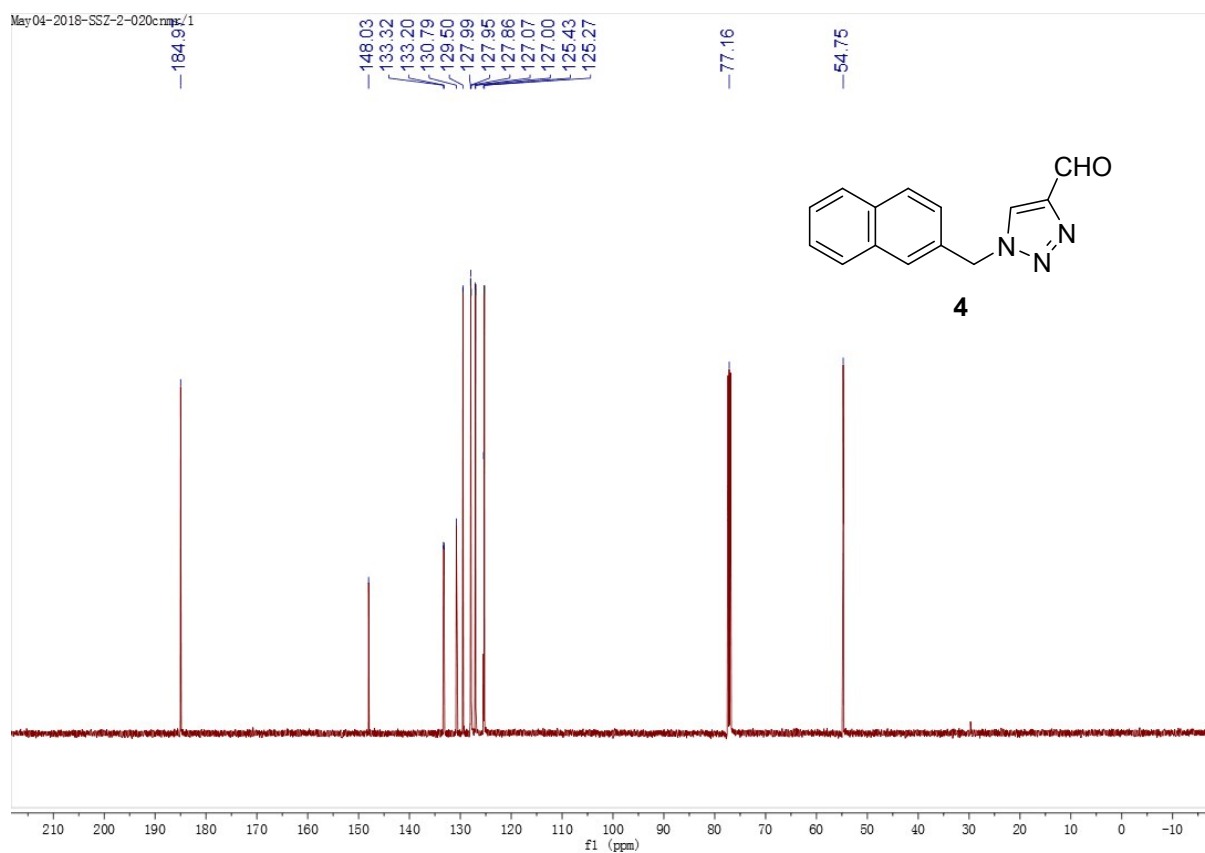

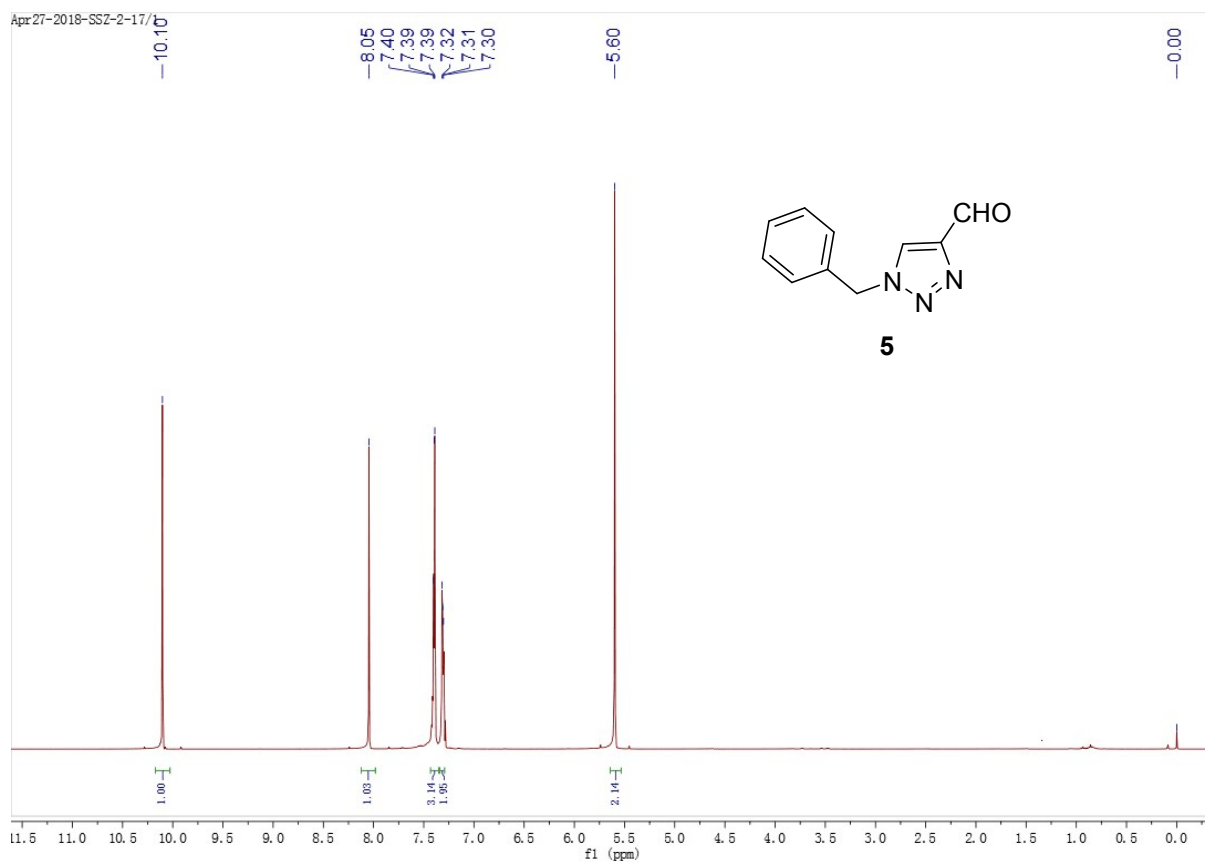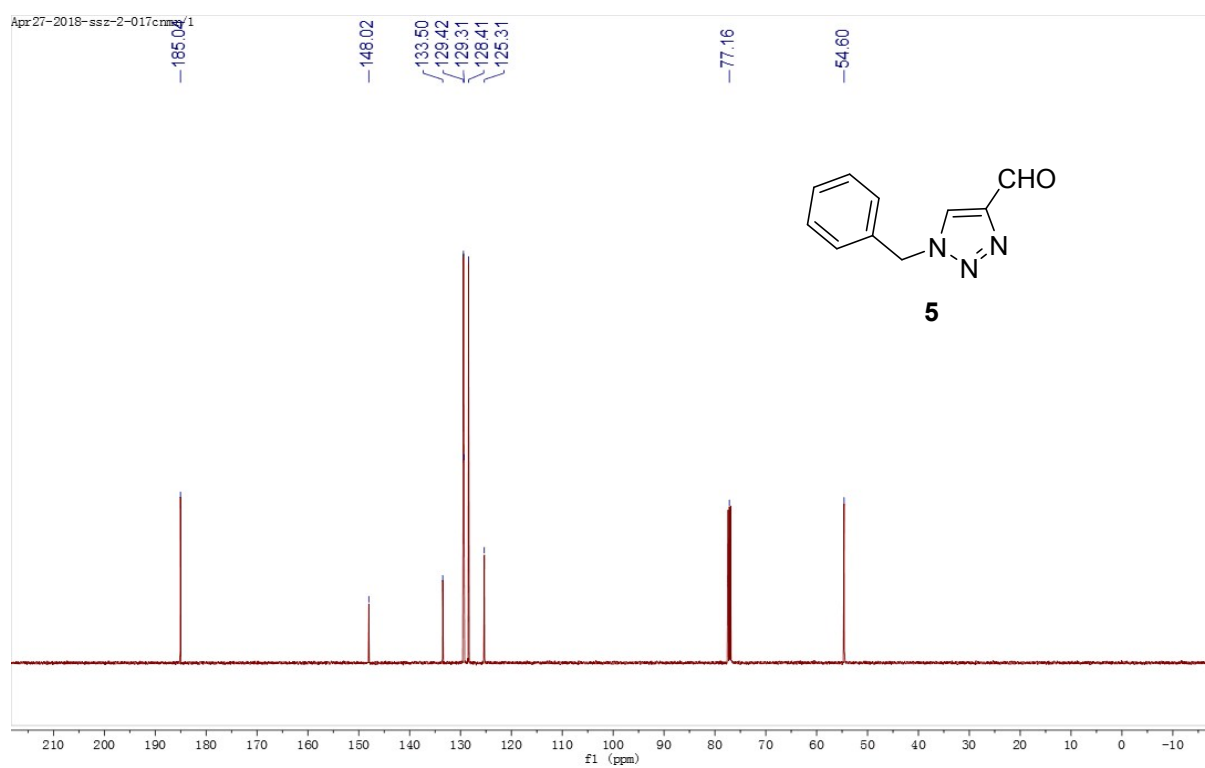

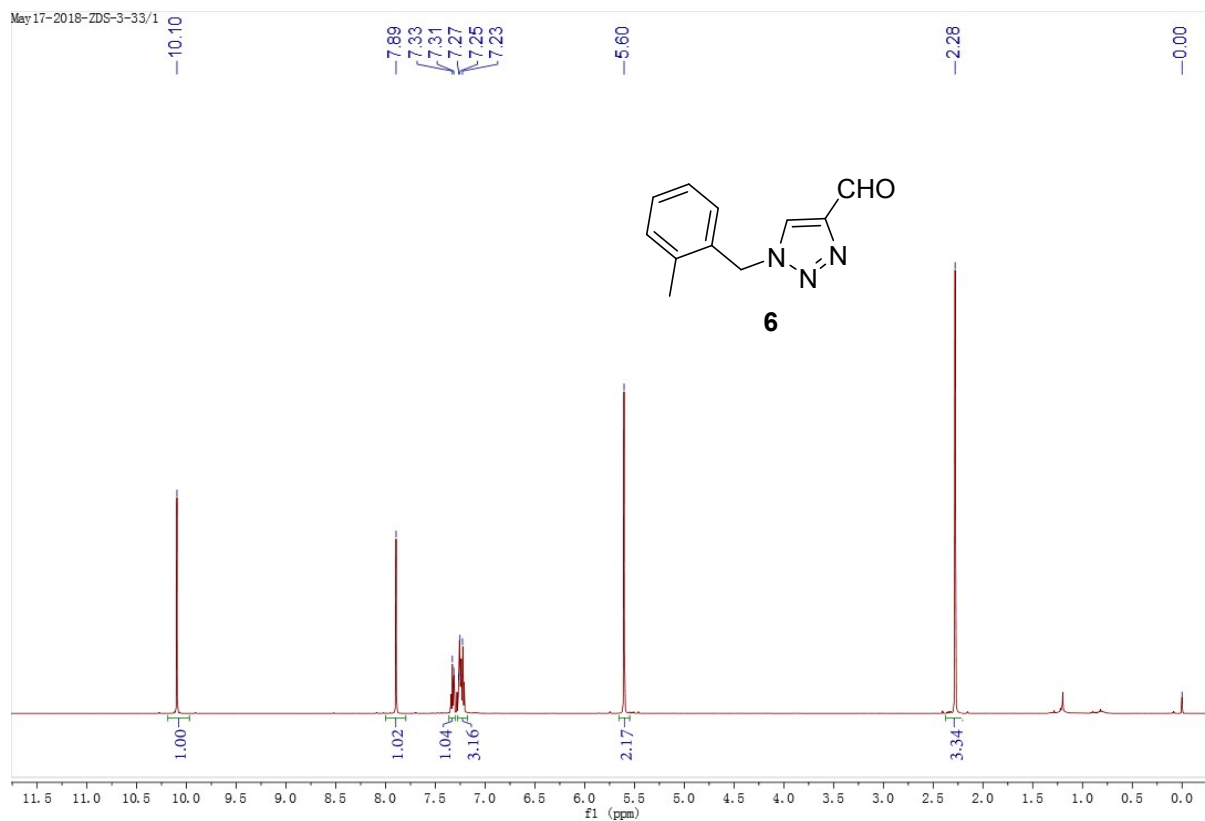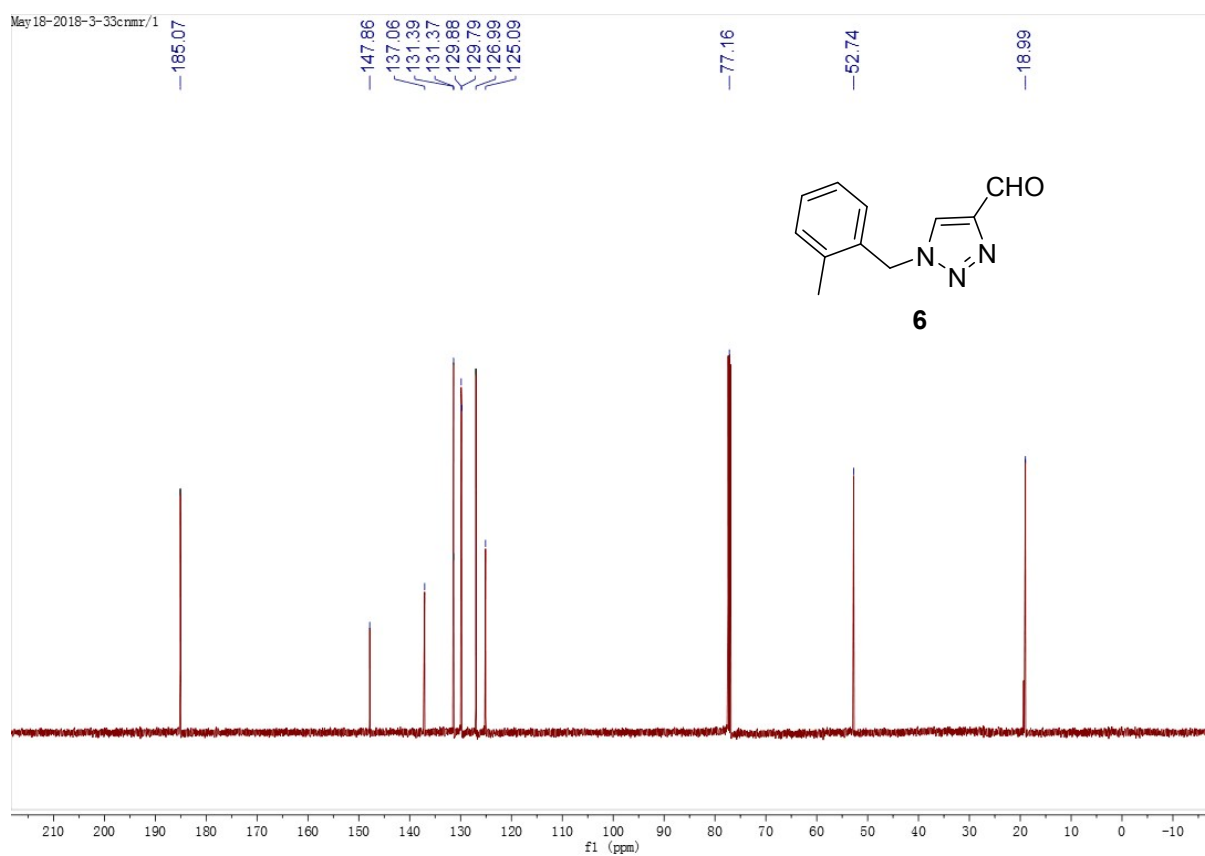

May 17-2018-ZDS-3-34/1

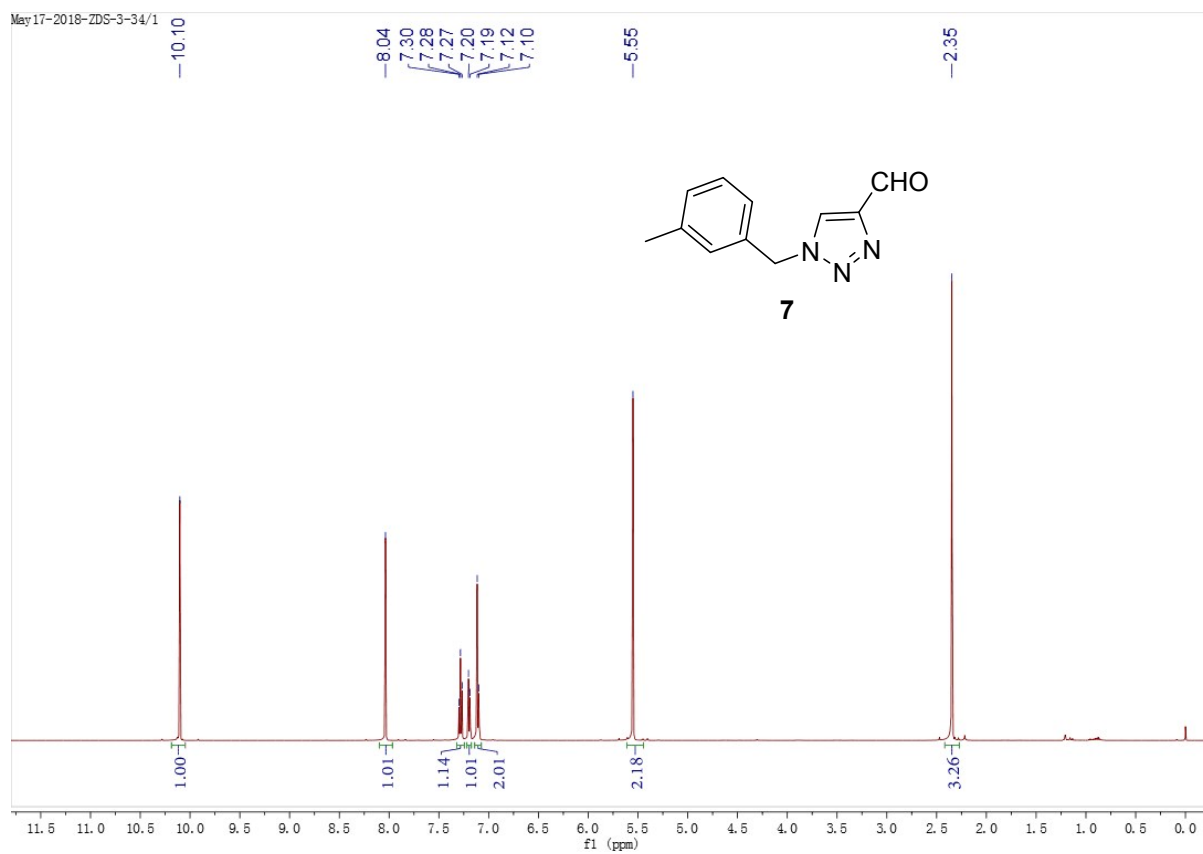

May 18-2018-3-34cmr/1

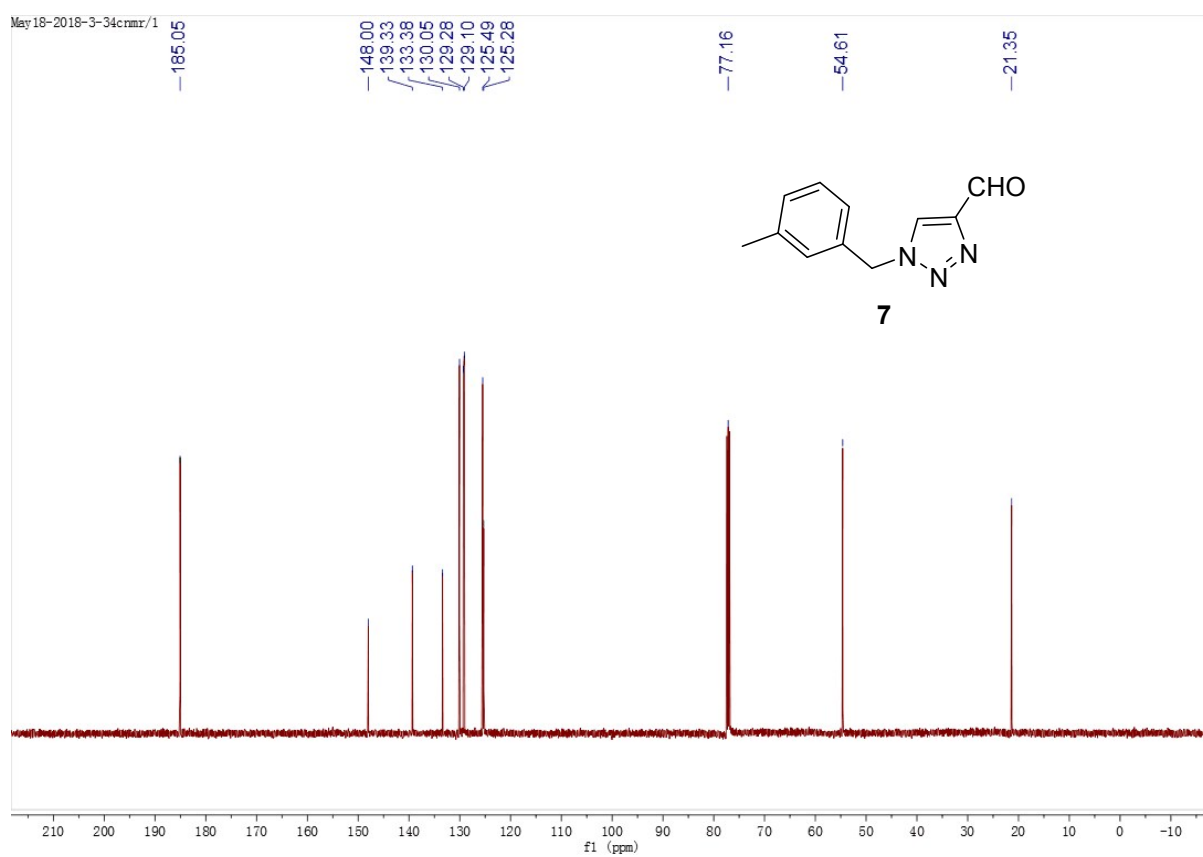



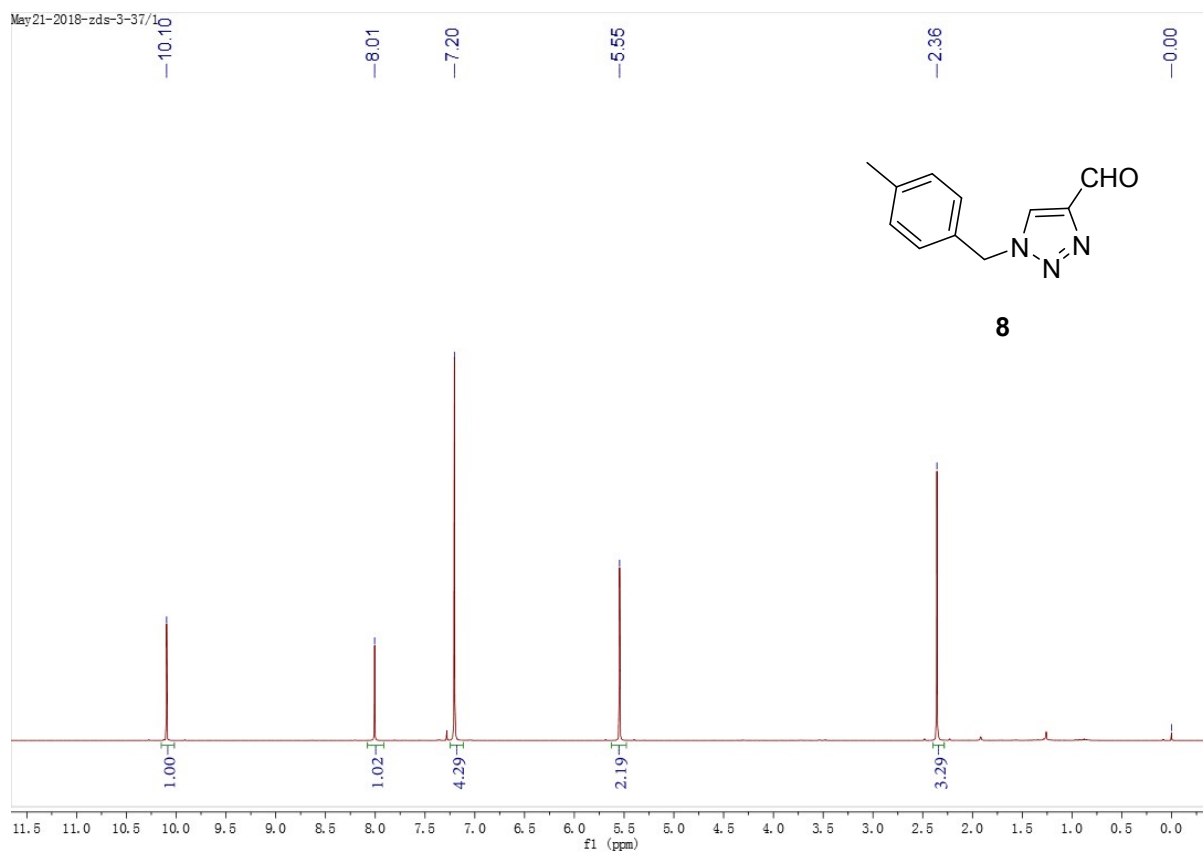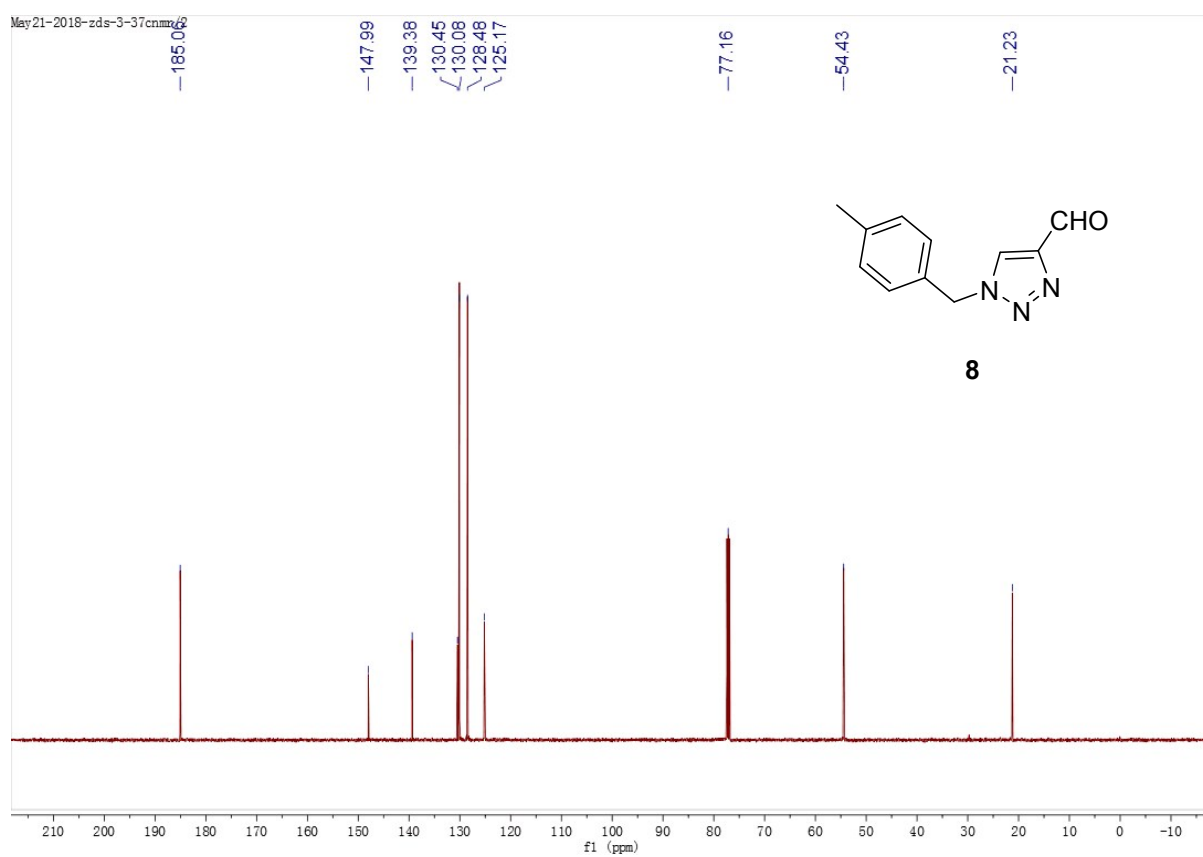

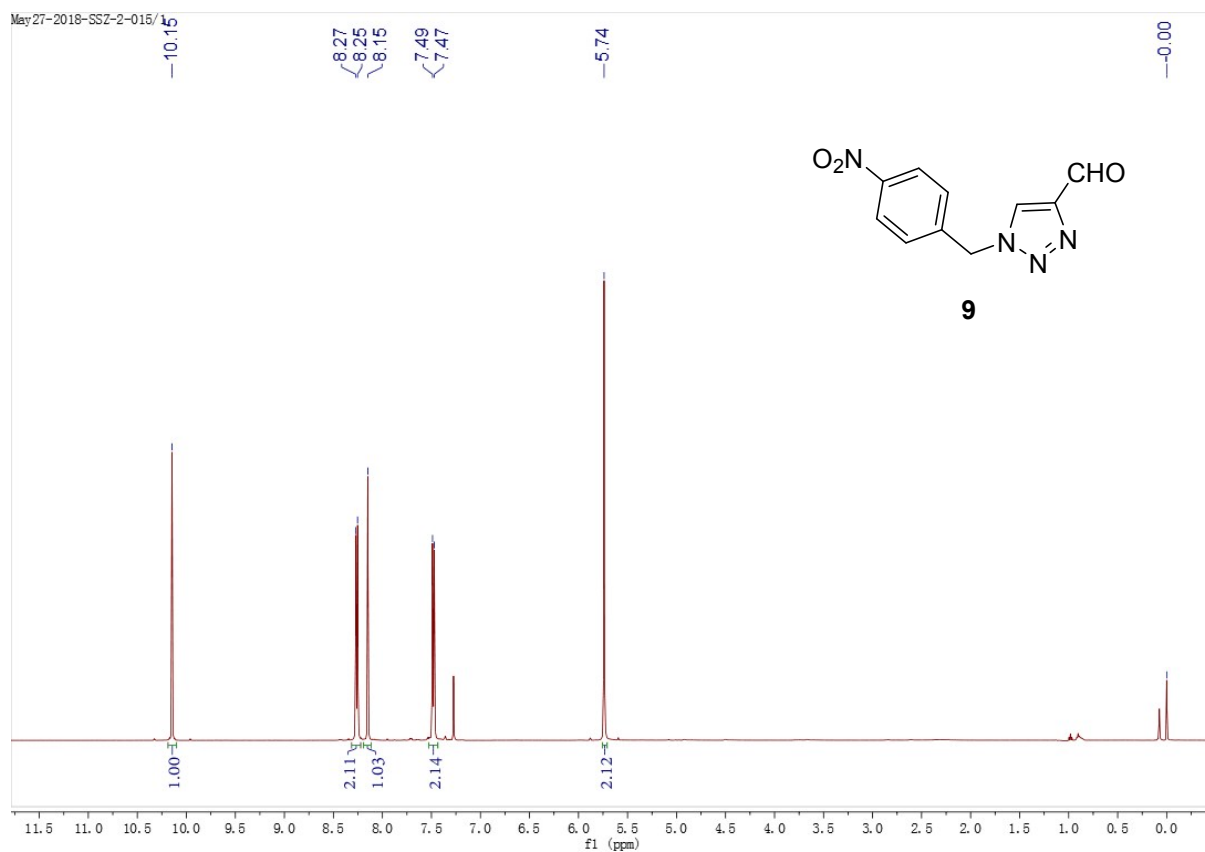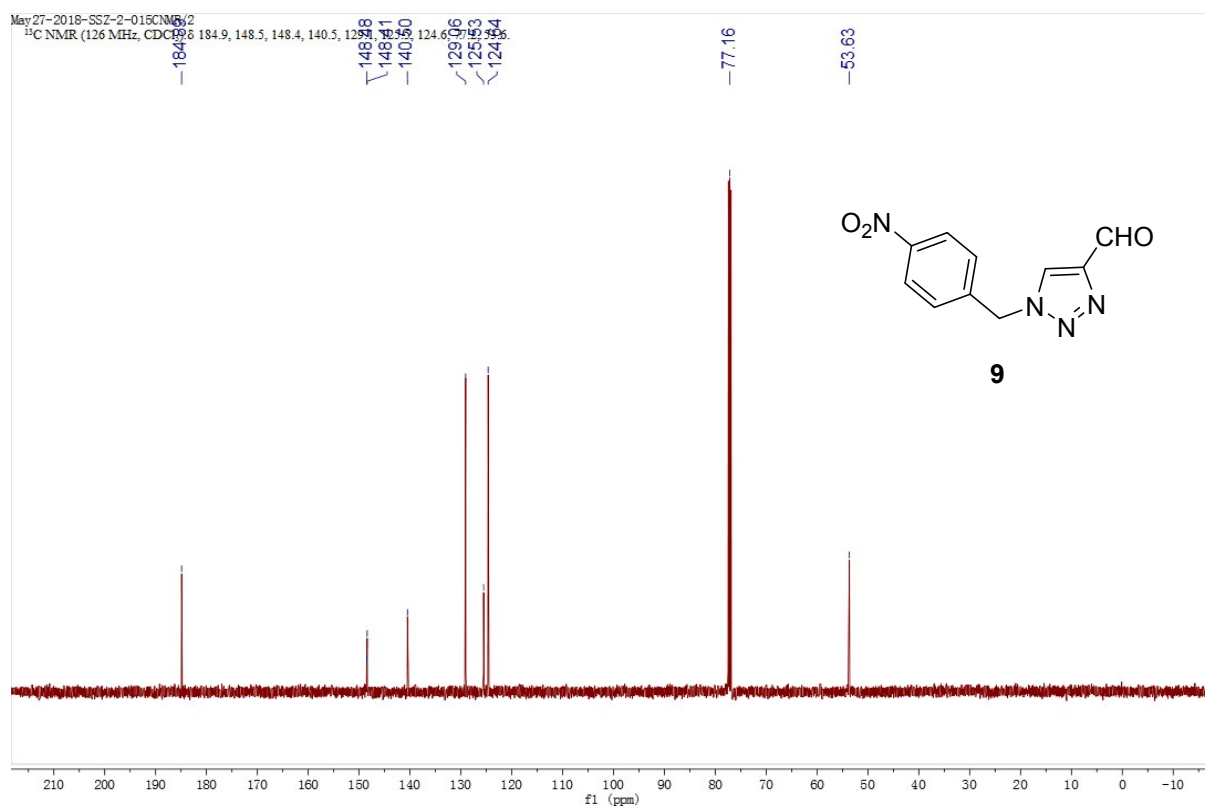

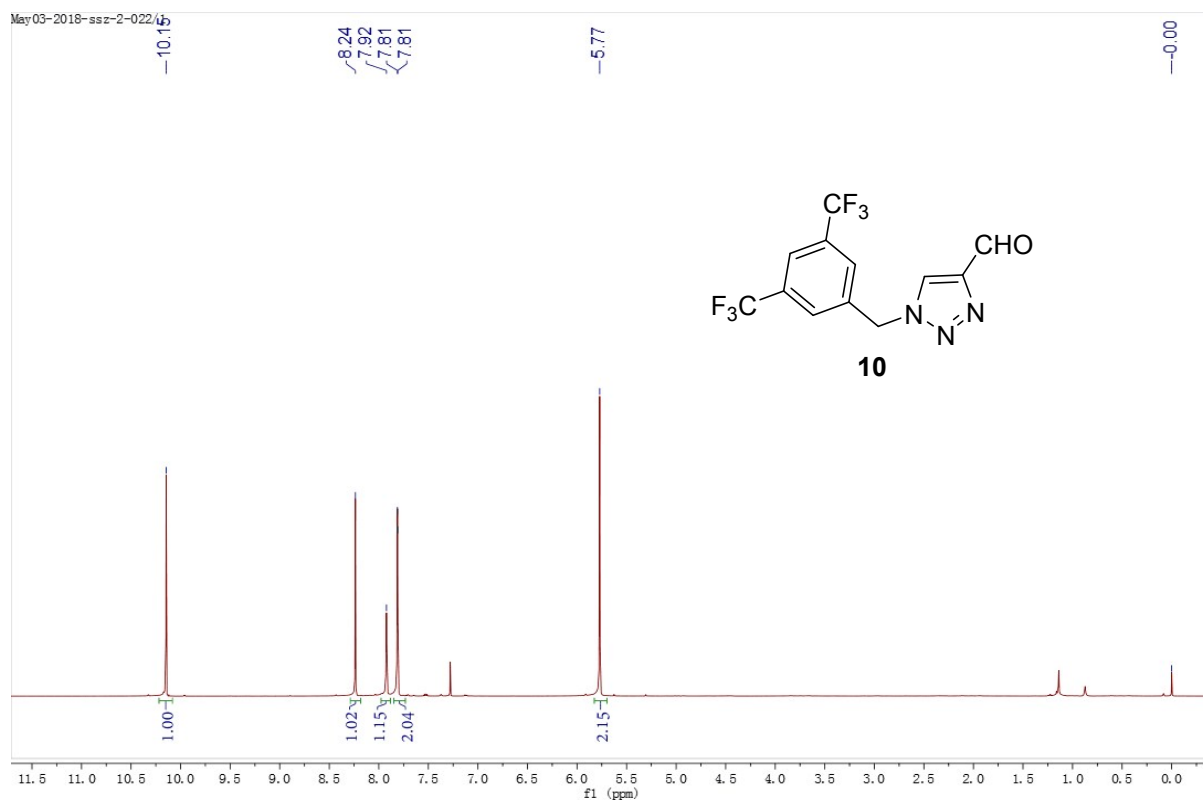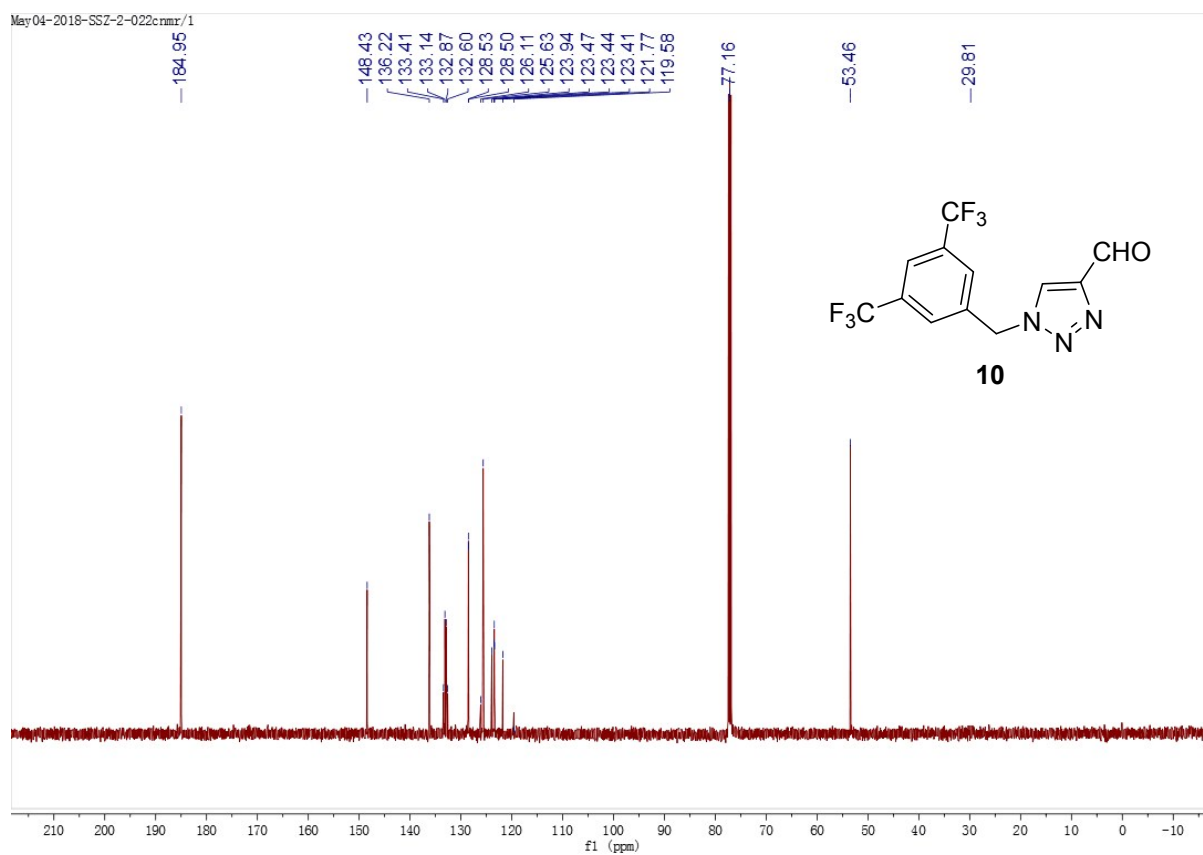

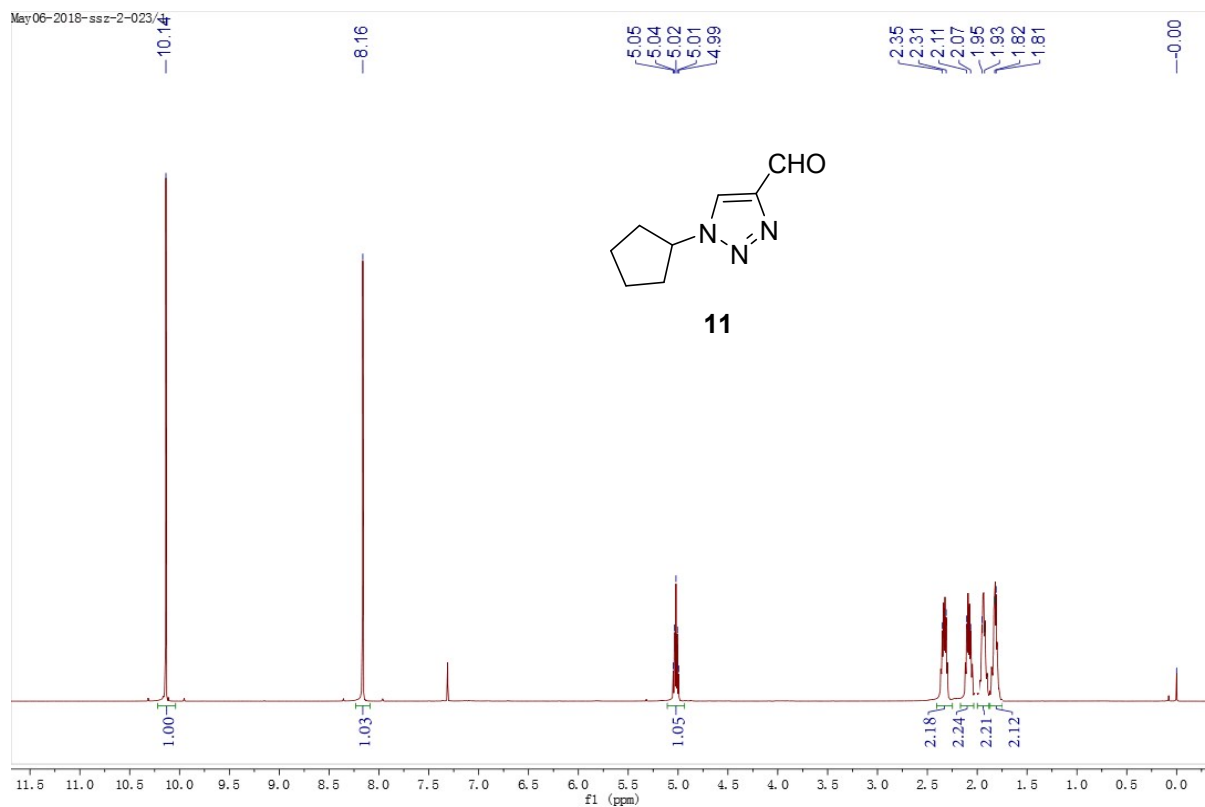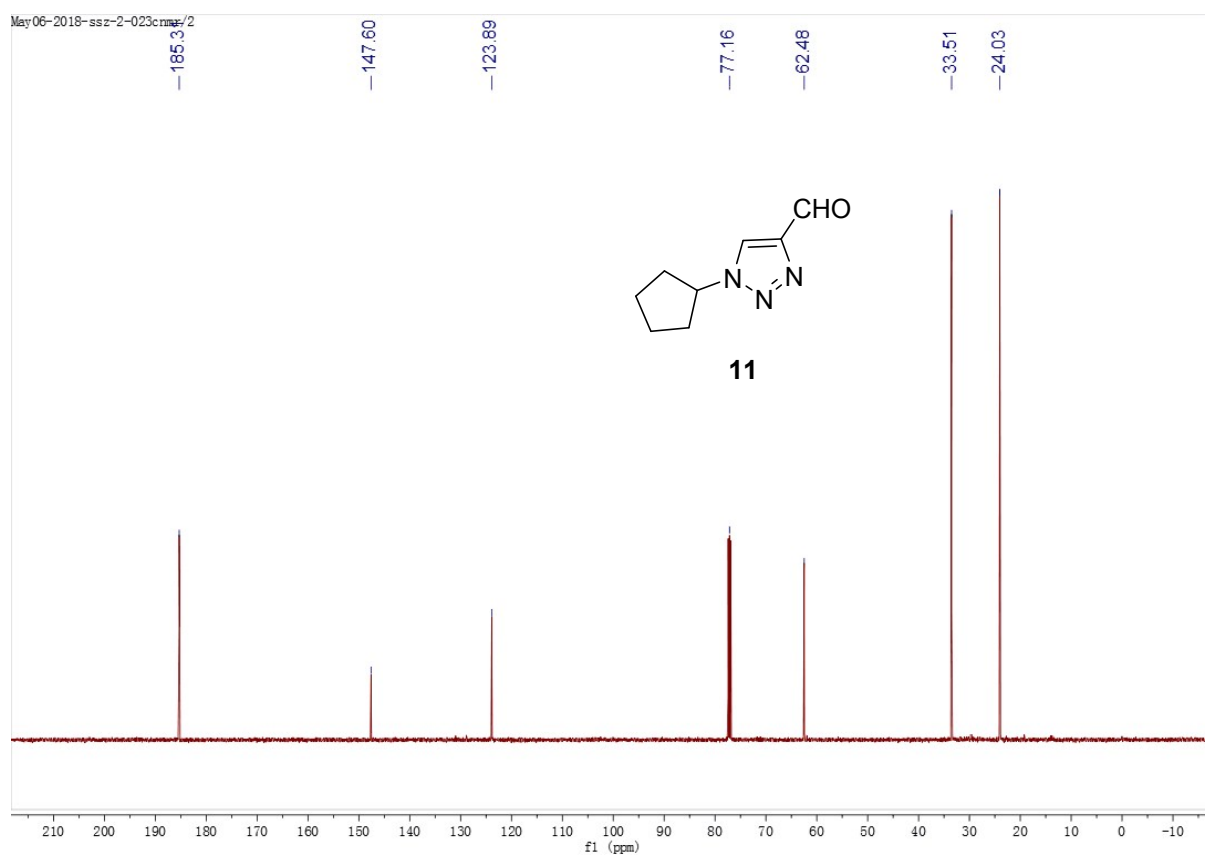

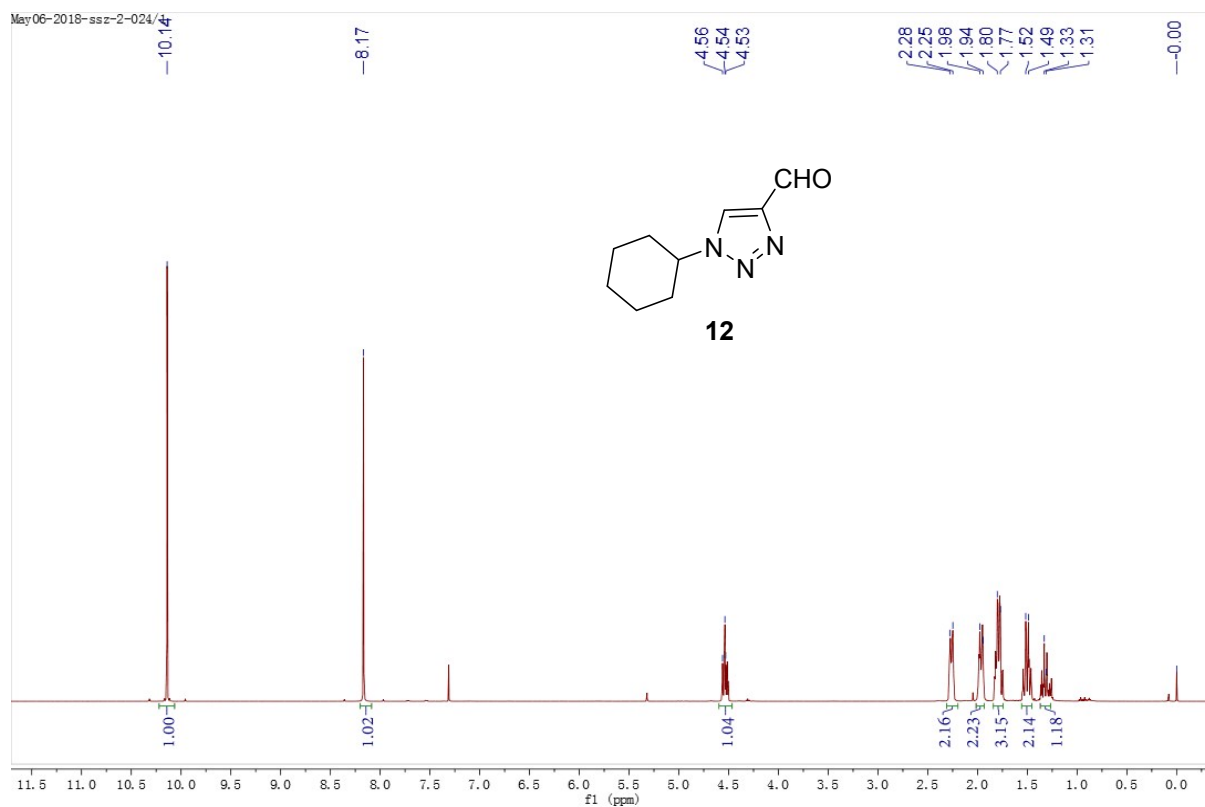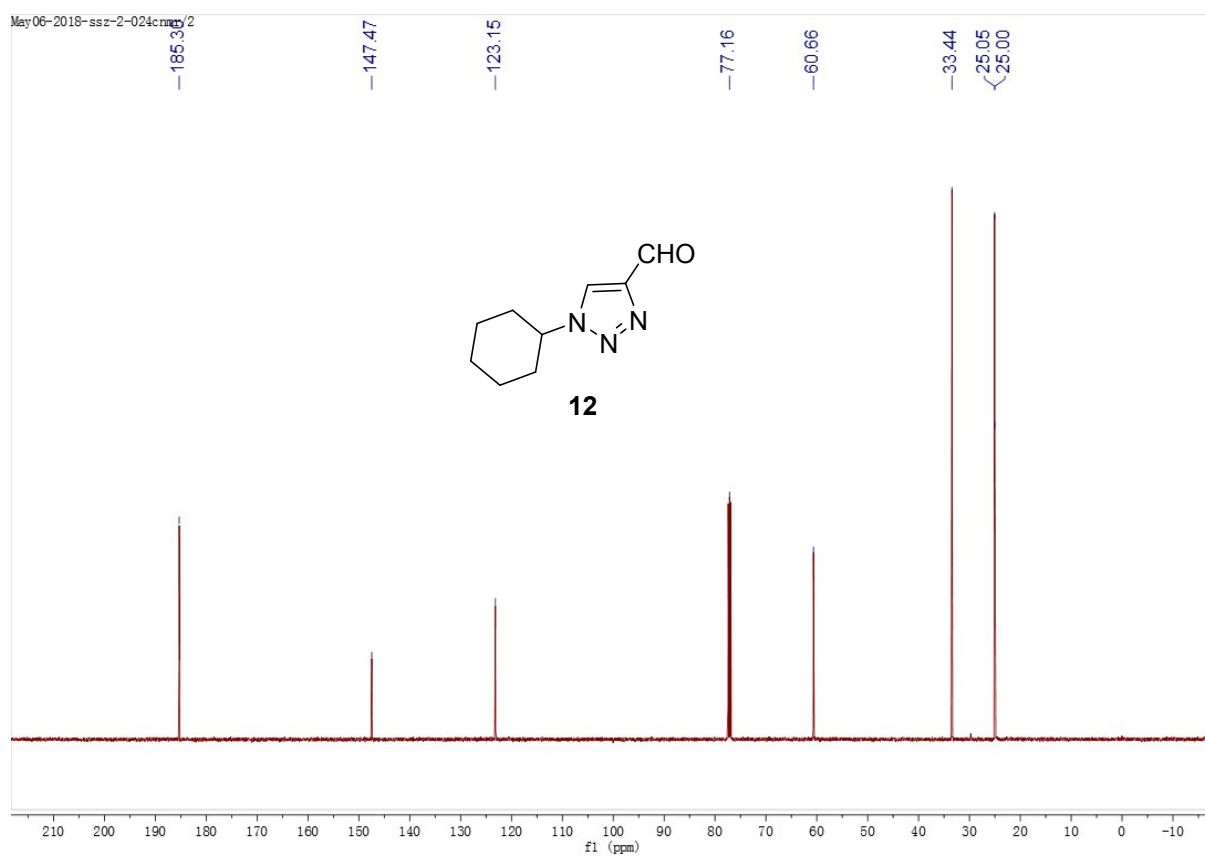

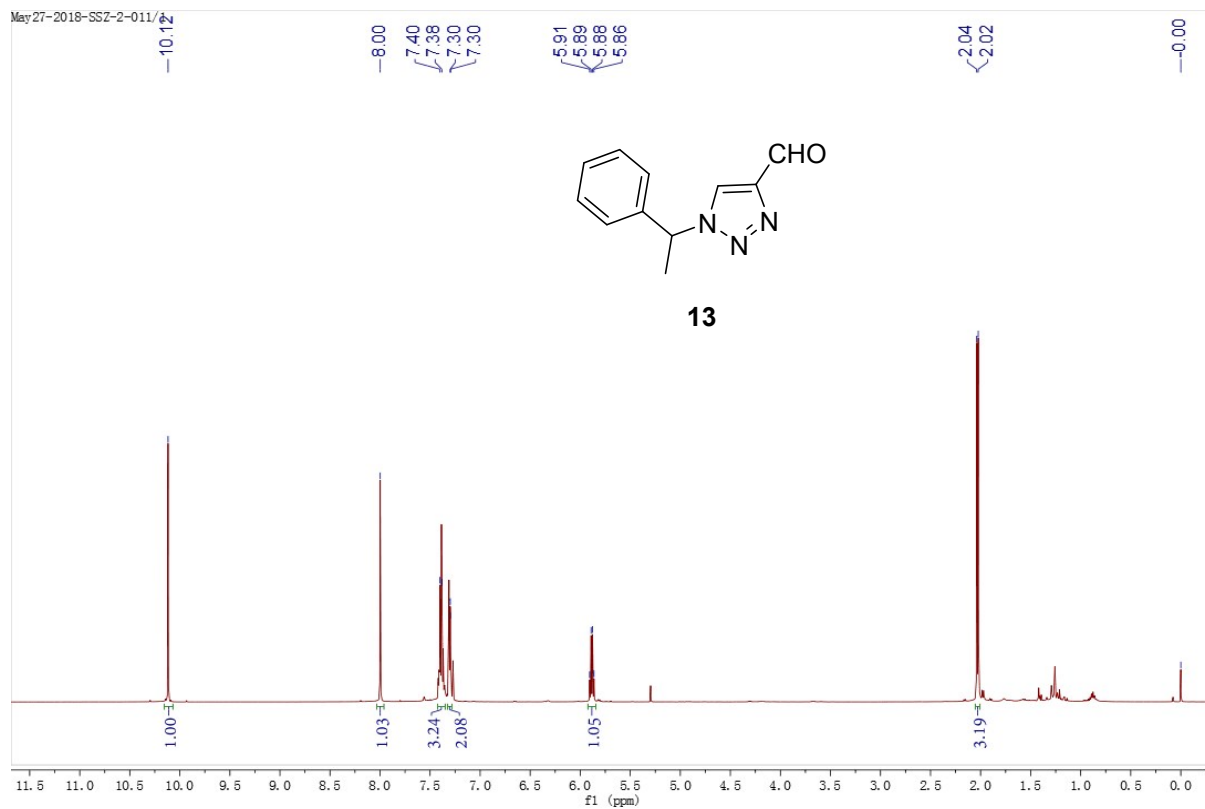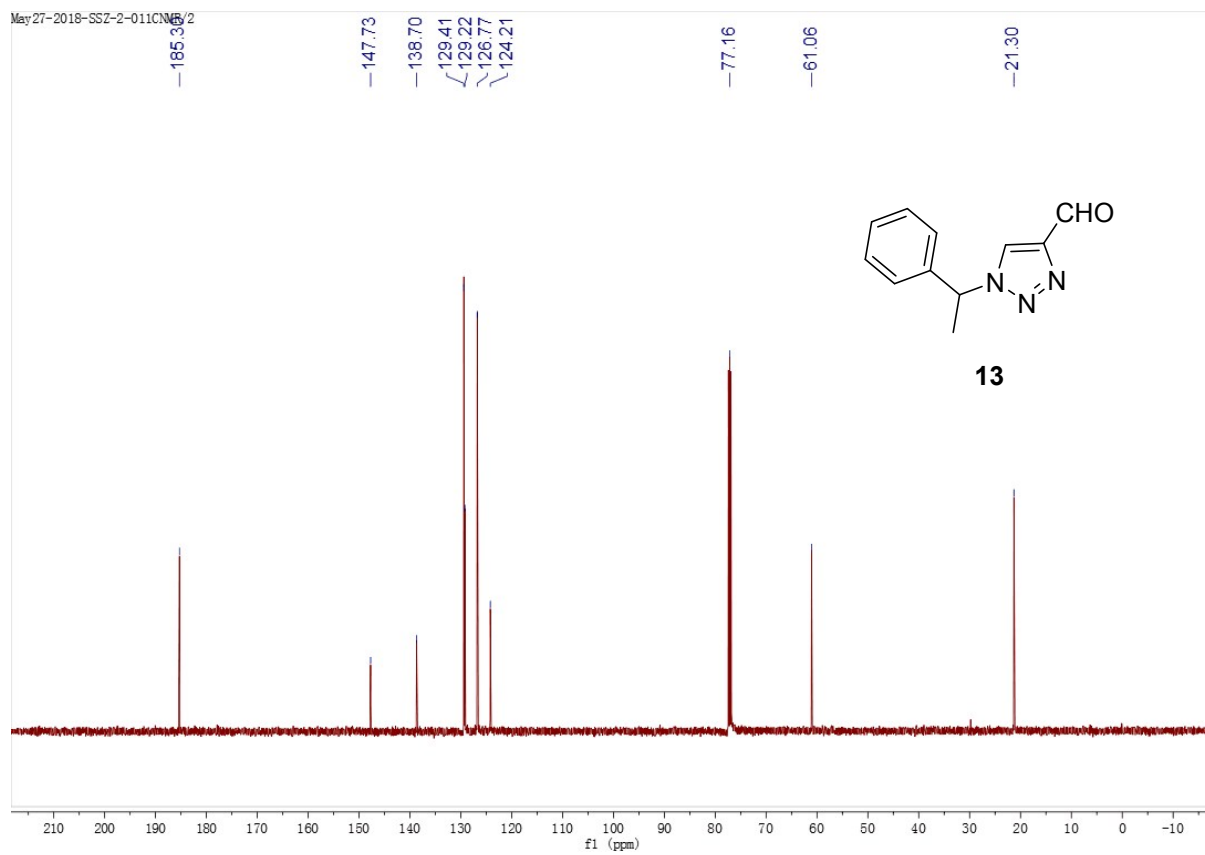

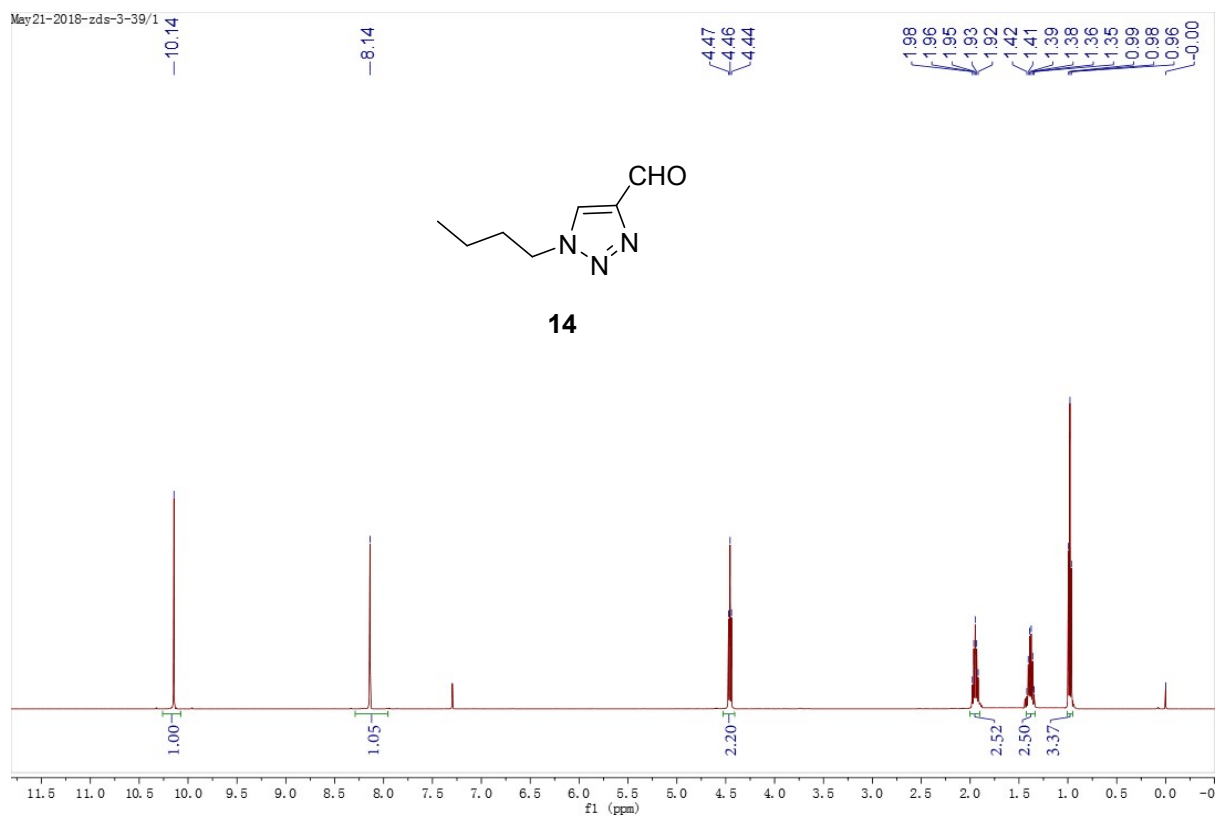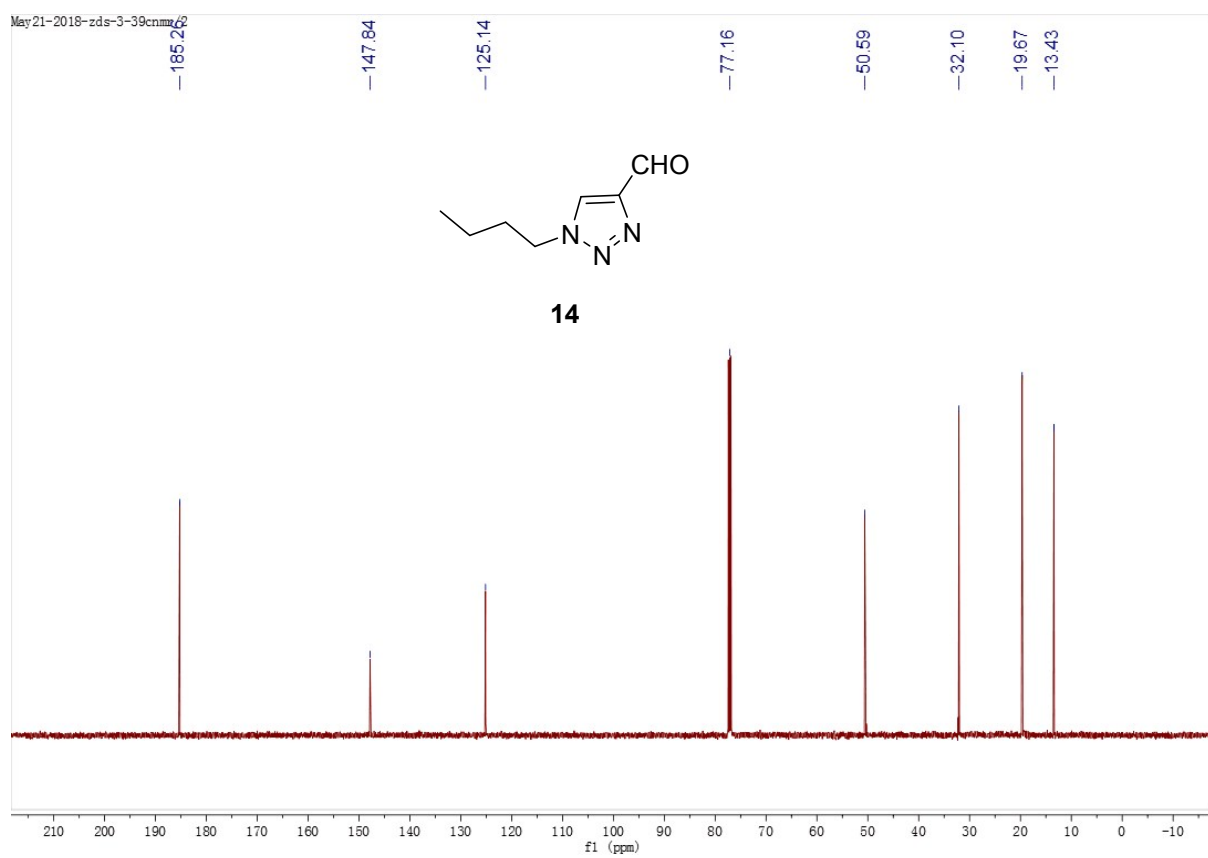

Apr 30-2018-SSZ-2-19/1

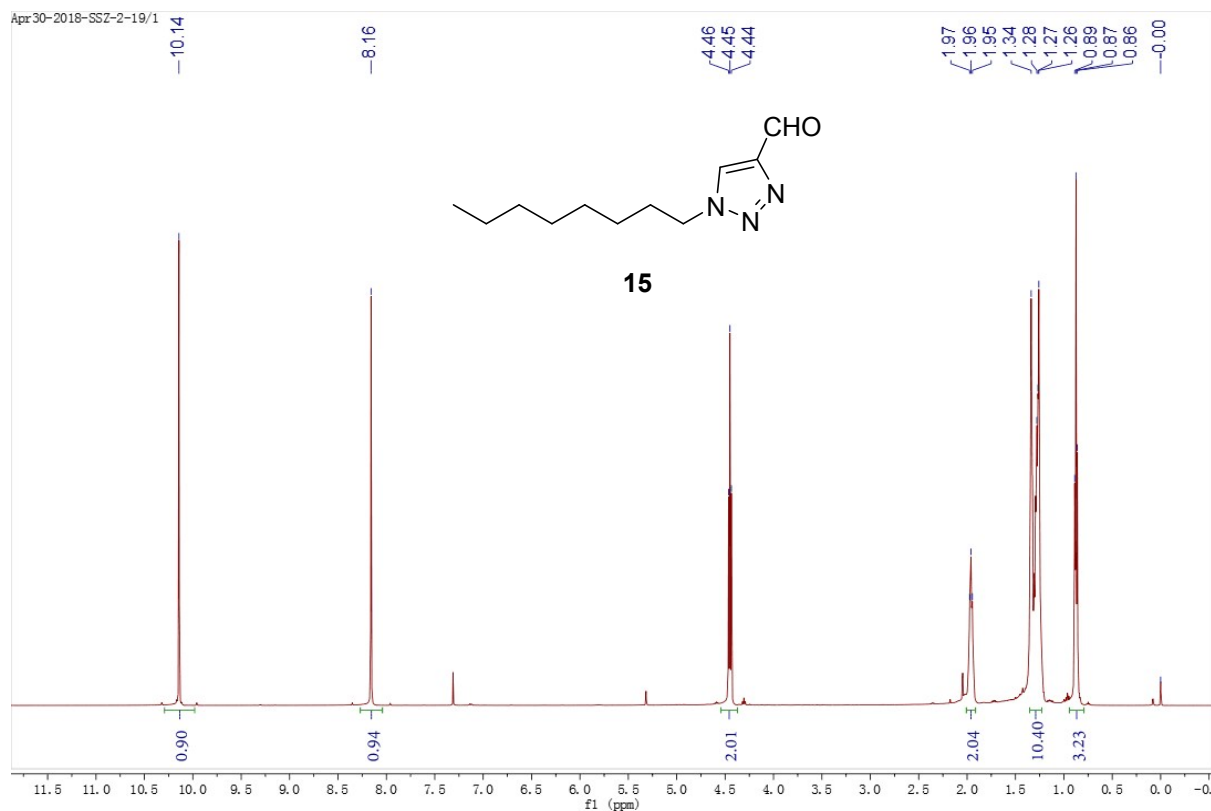

May 01-2018-SSSZ-2-19C NMR 1

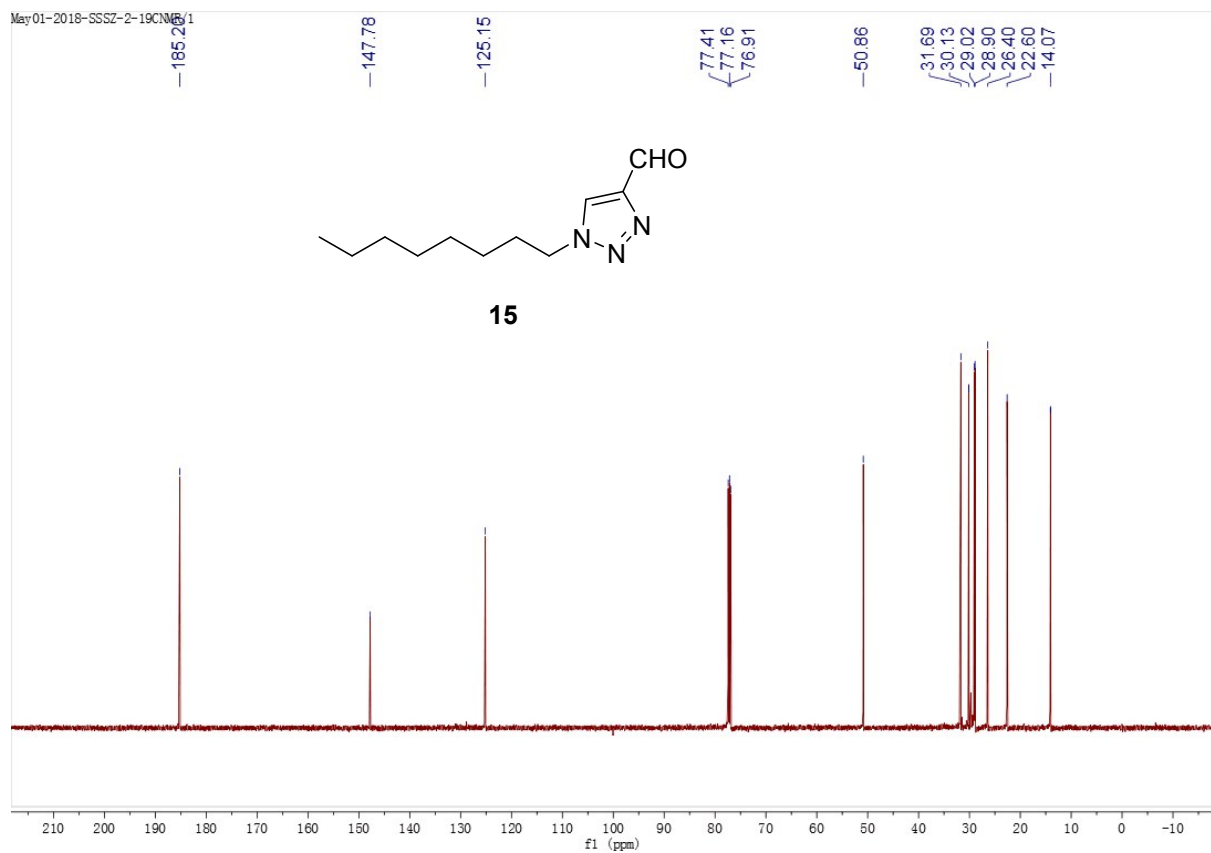



May 19-2018-3-36-1/1

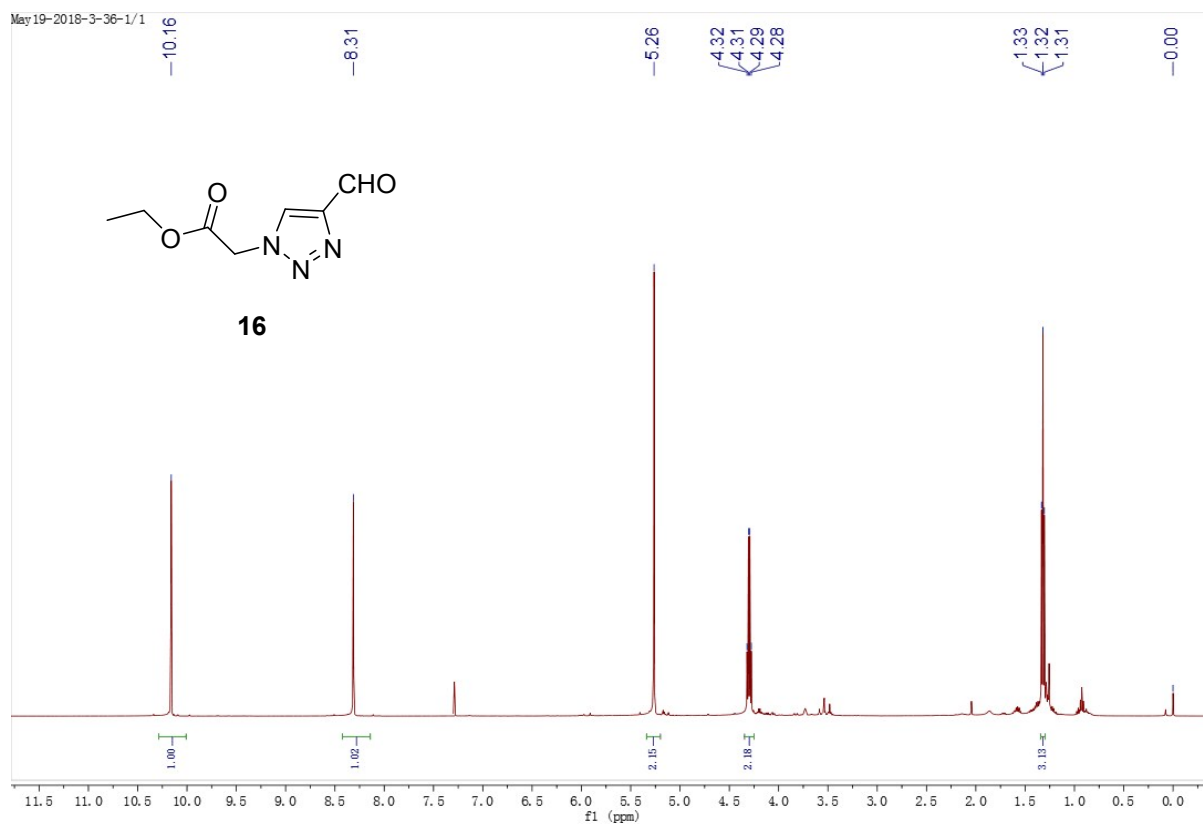

May 19-2018-3-36-1cmmr/2

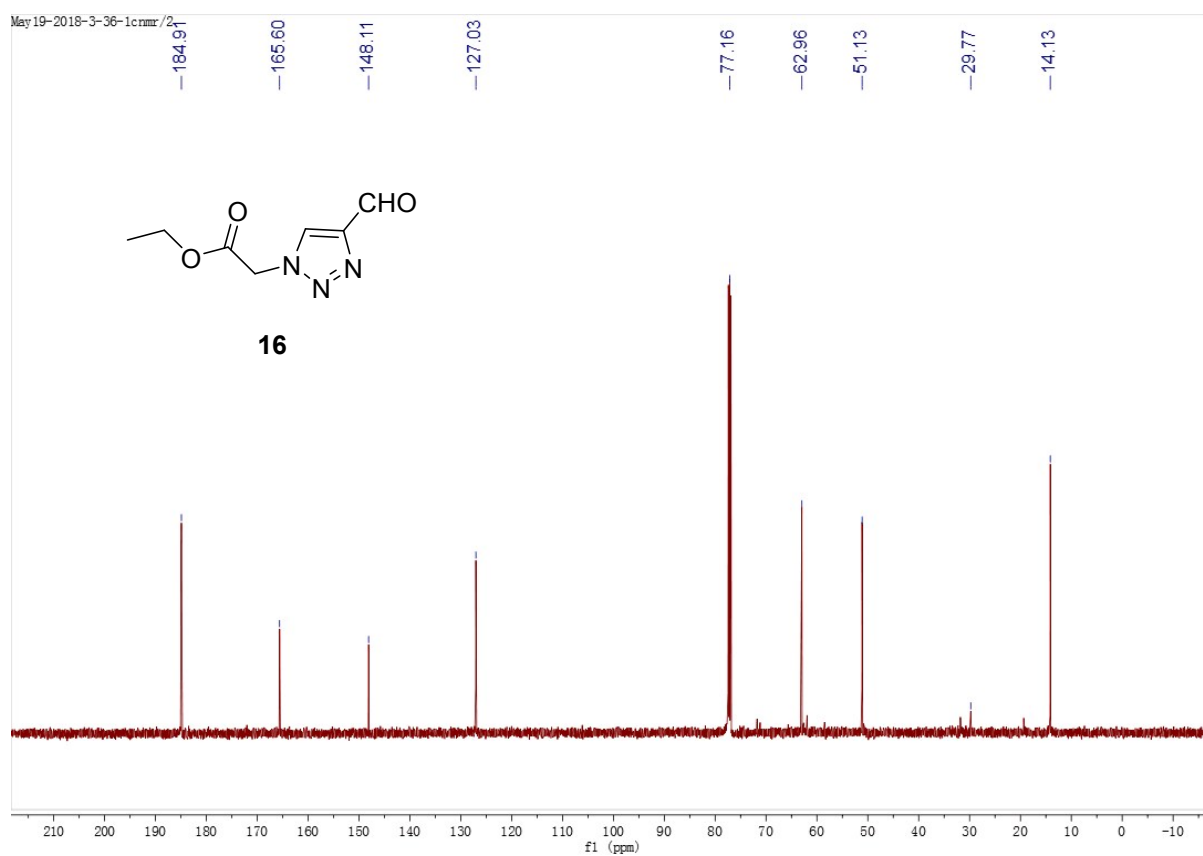

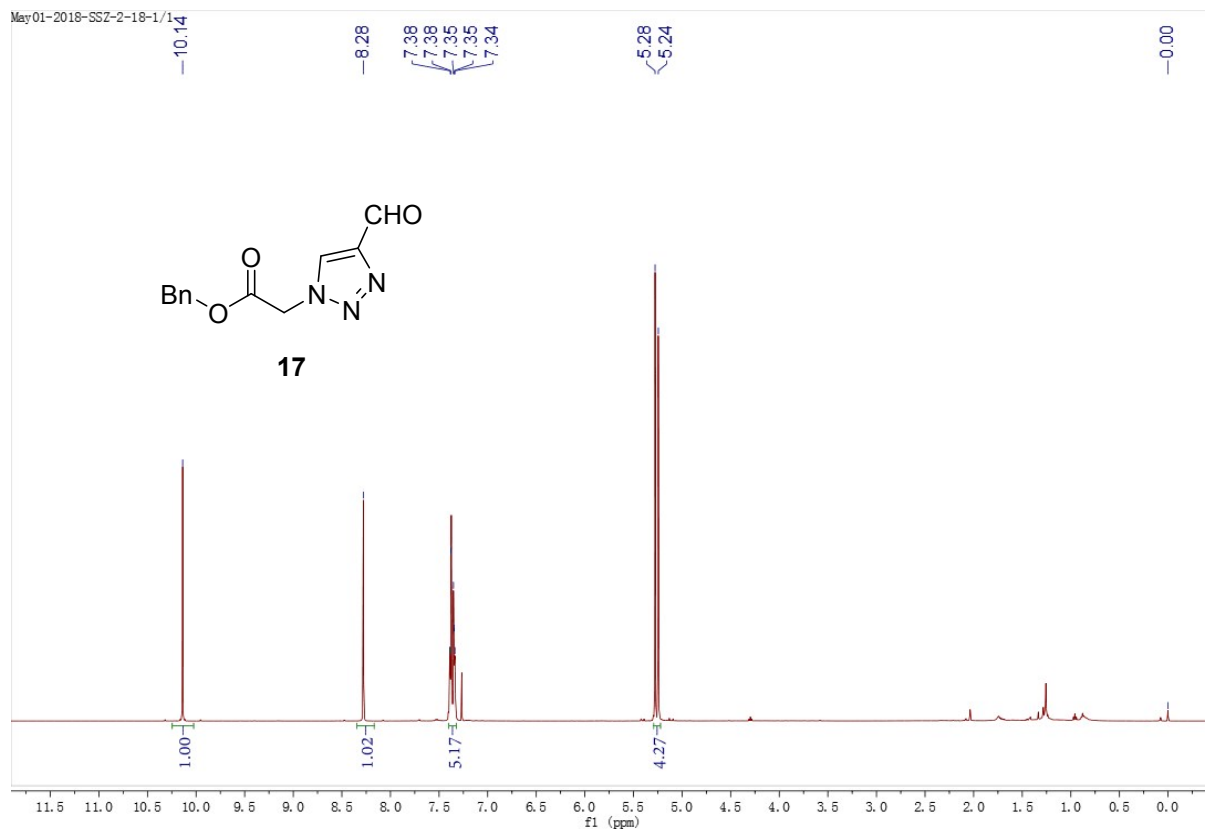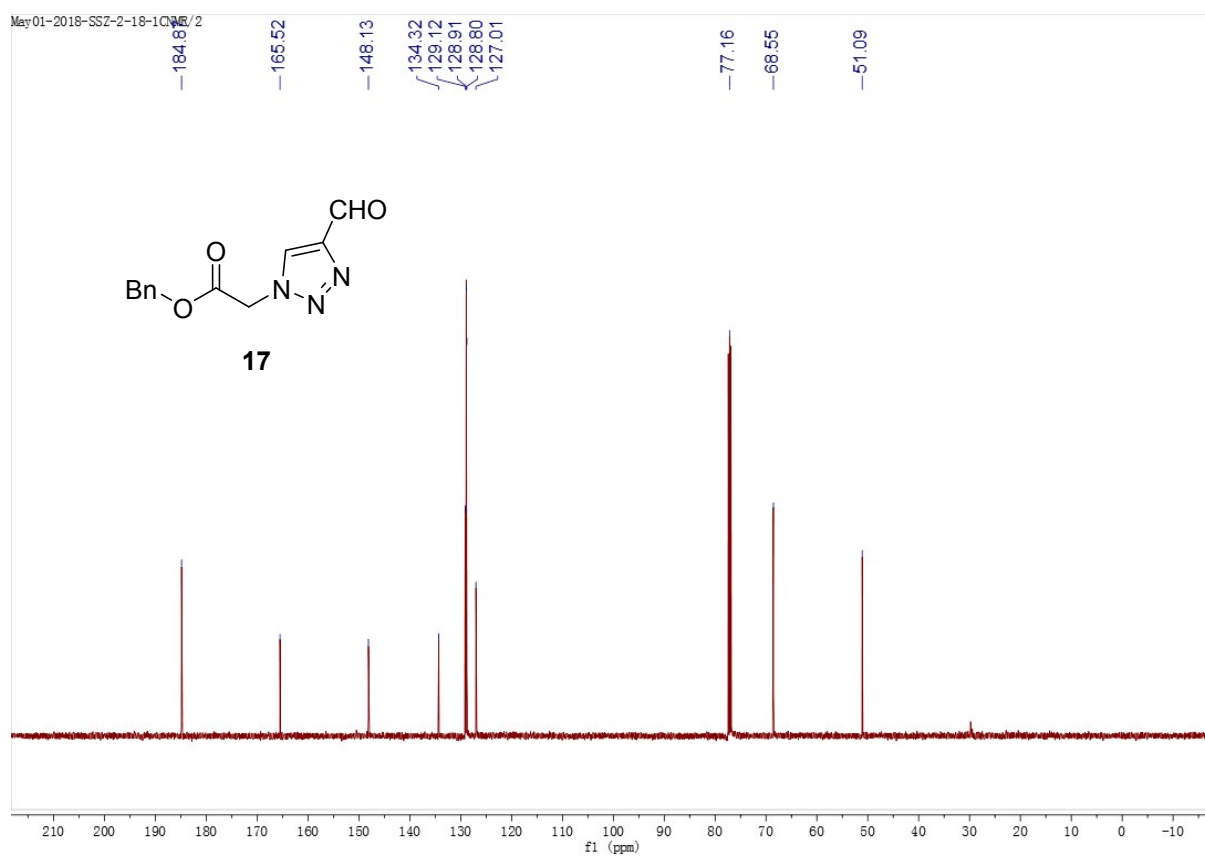

May27-2018-ssz-2-016/k

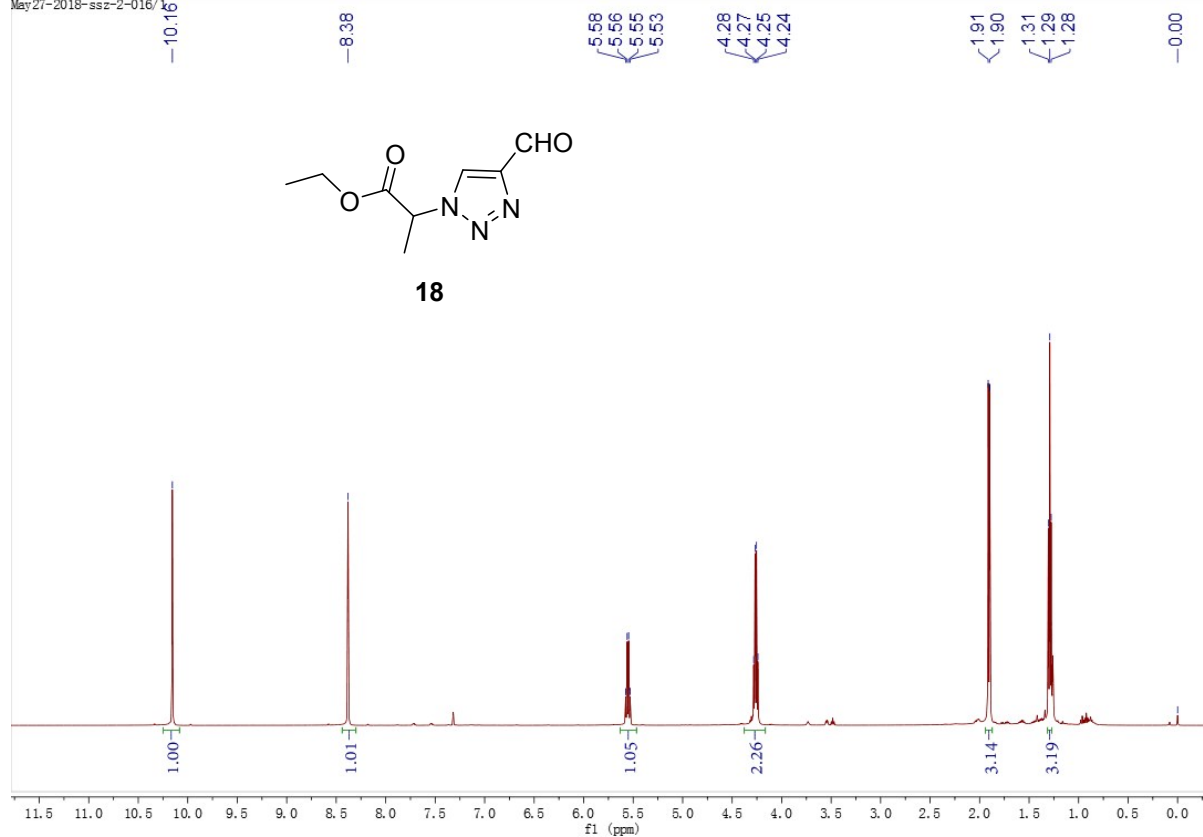

Apr27-2018-ssz-1-016cmg/2

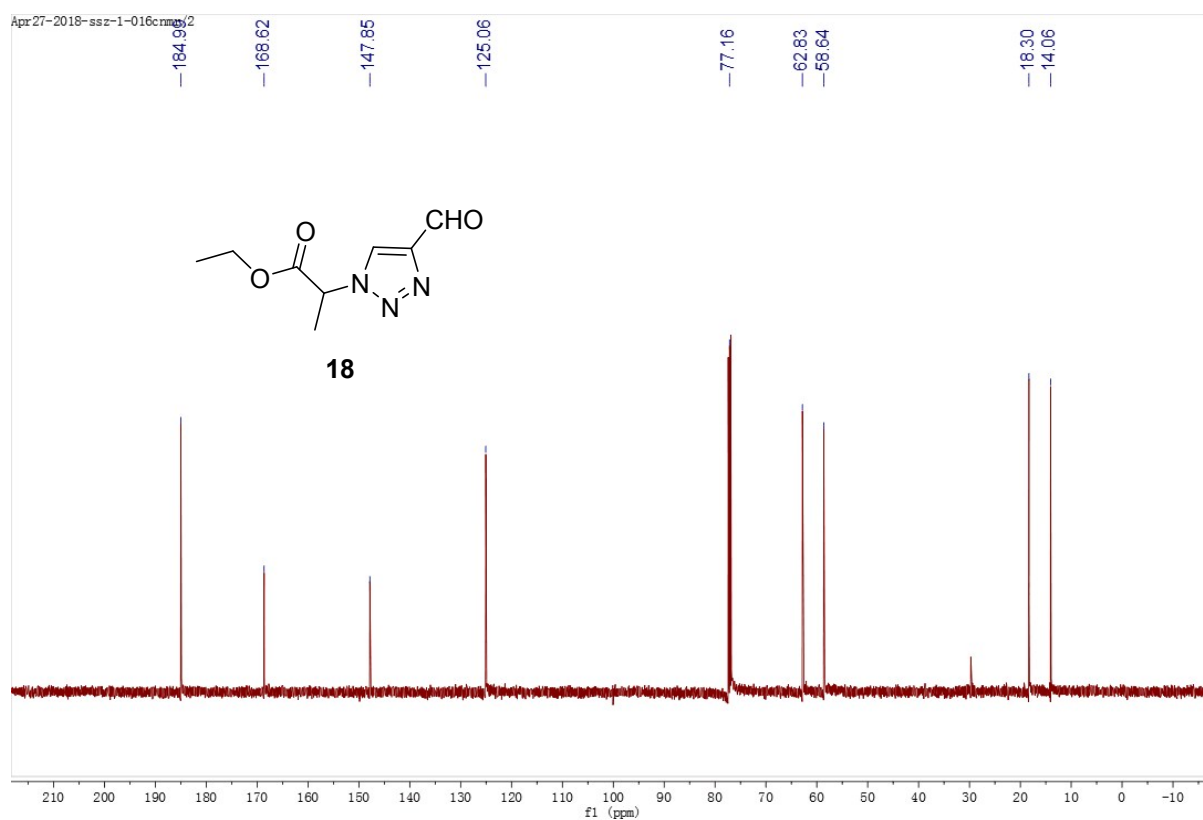

May 23-2018-3-45/1

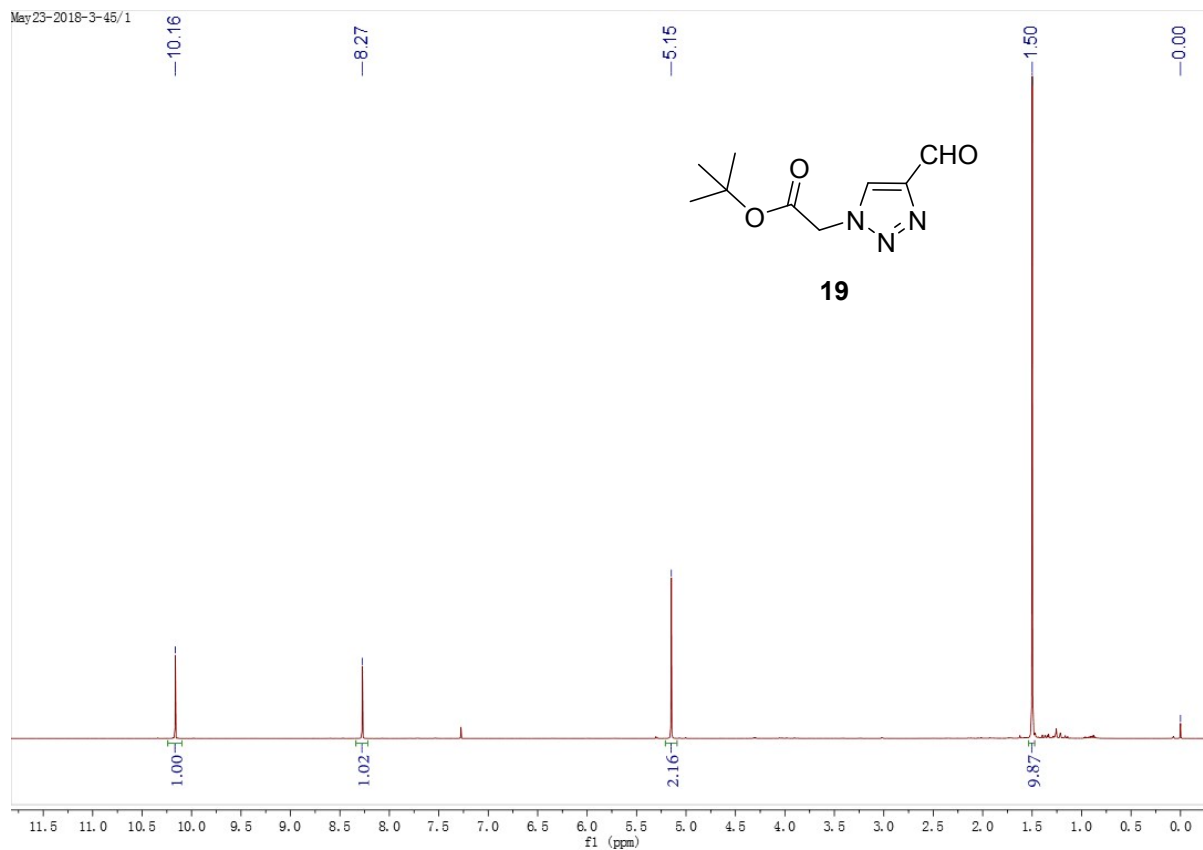

May 23-2018-3-45:cmr/2

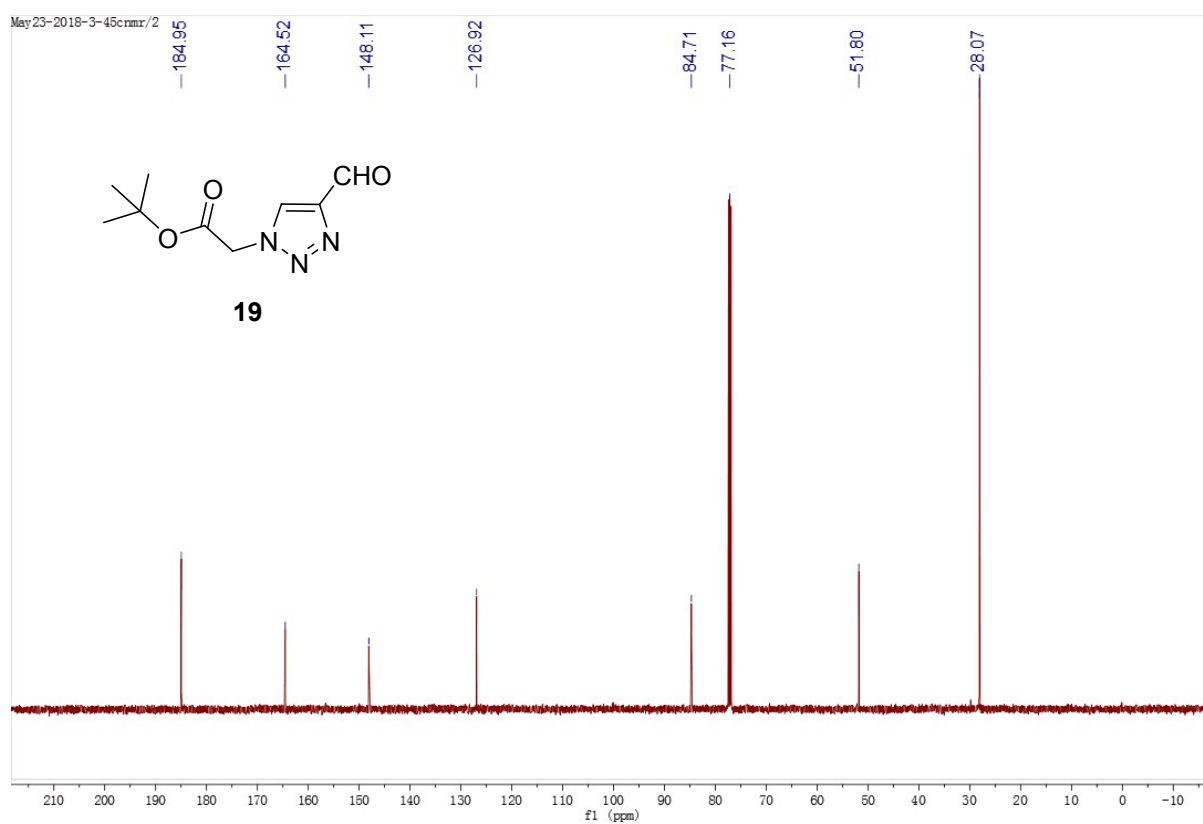

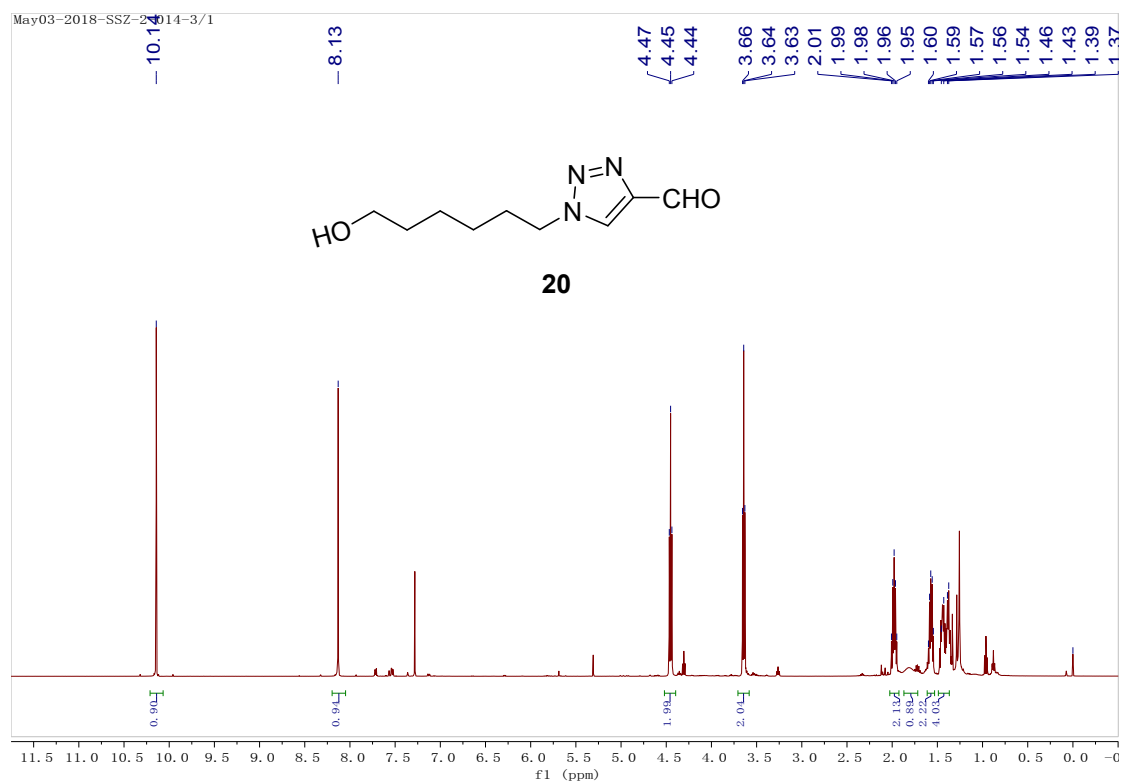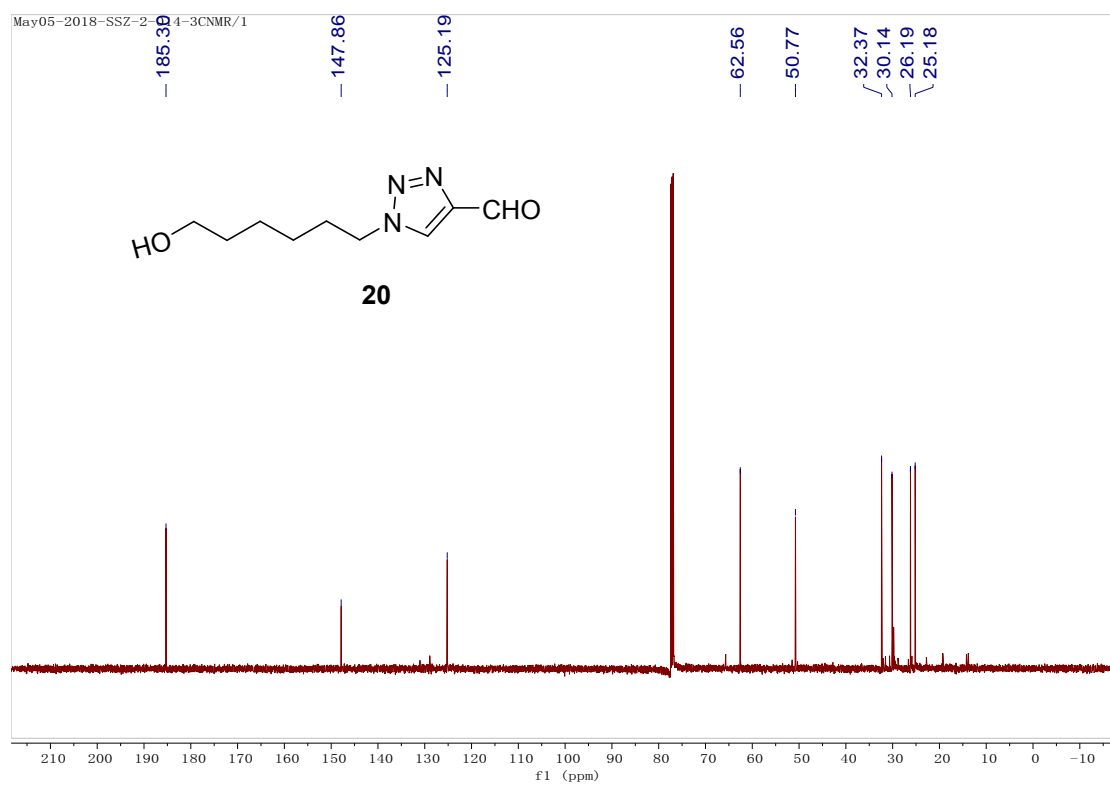

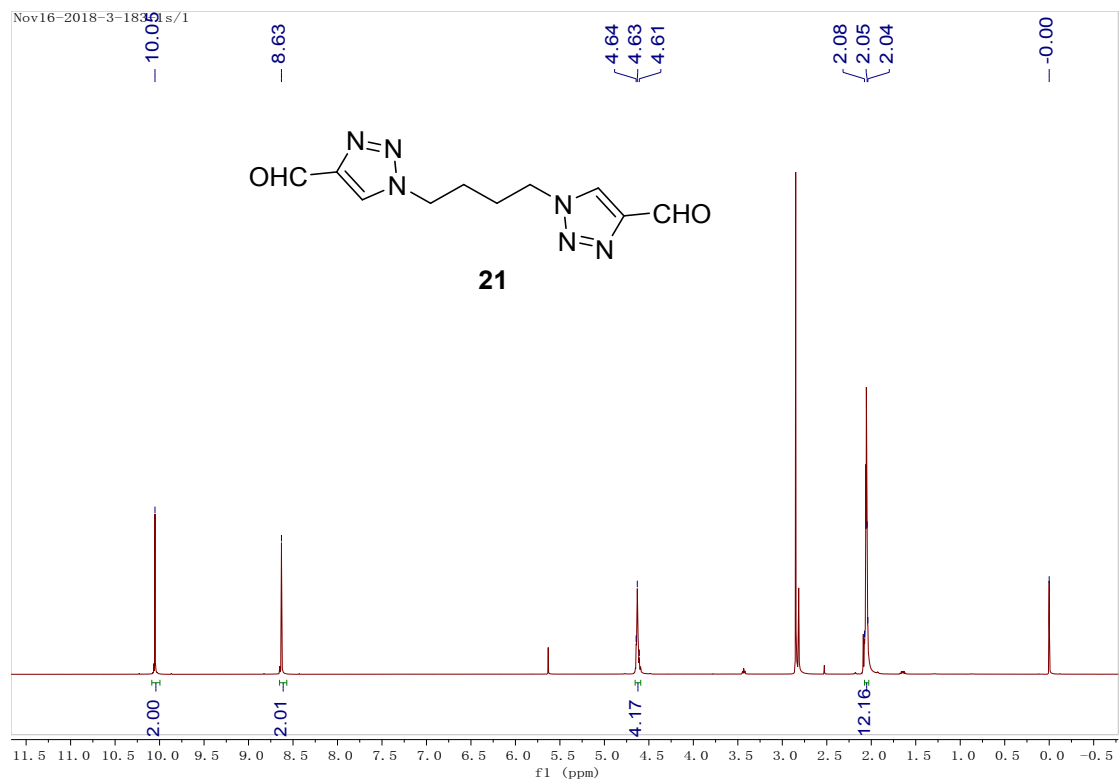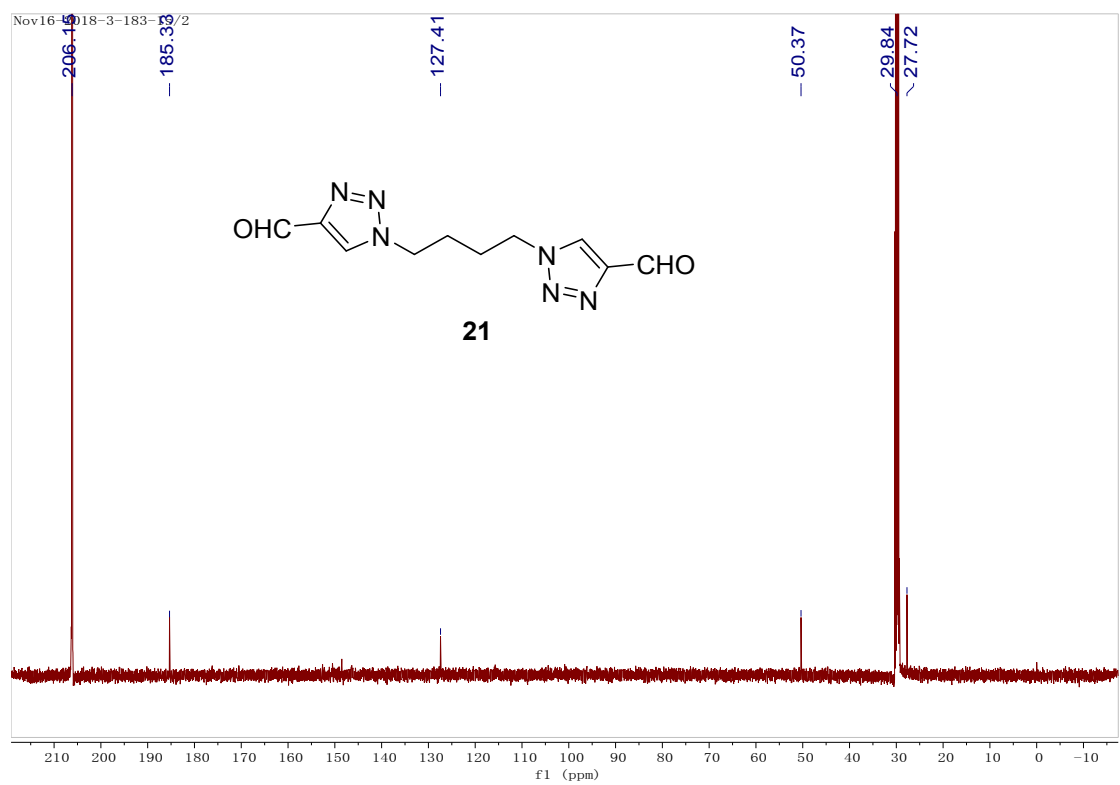

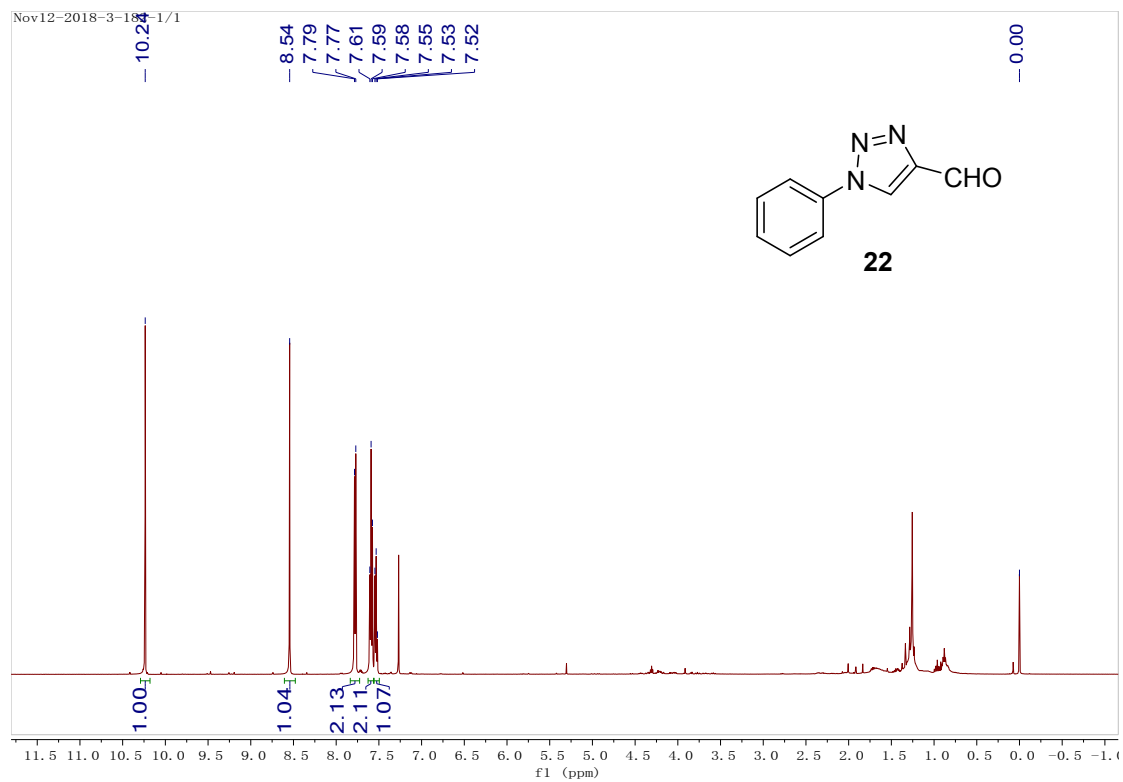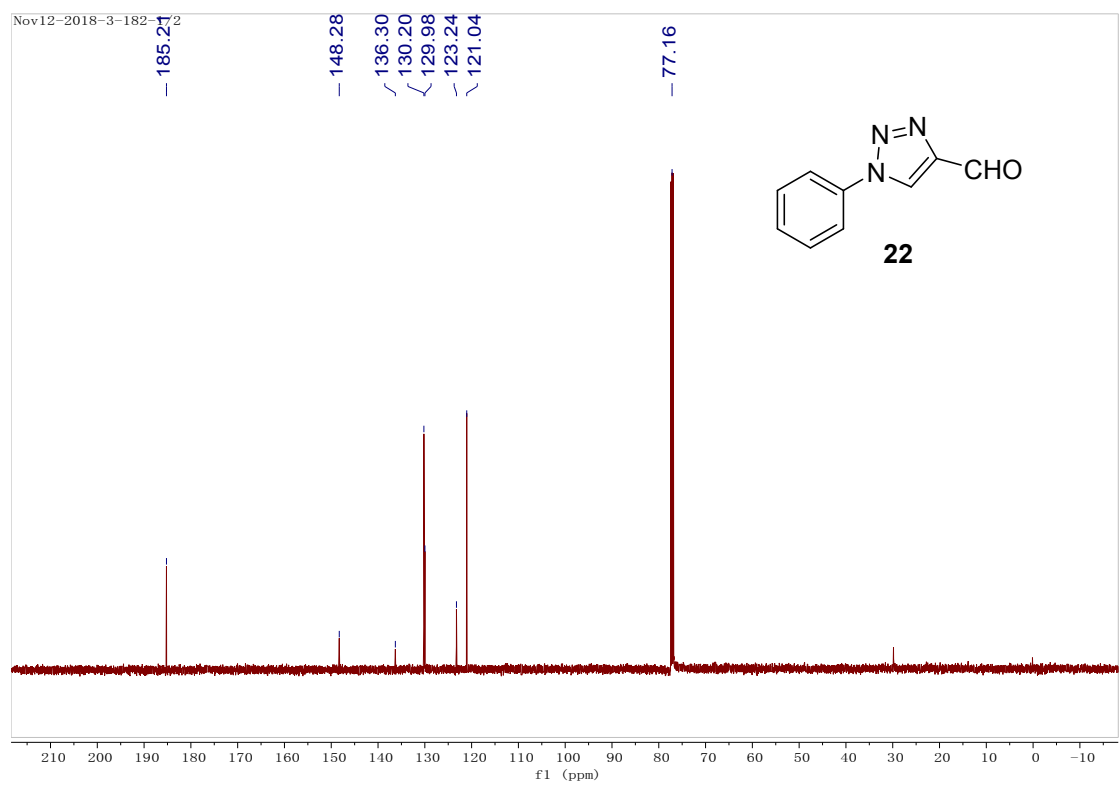

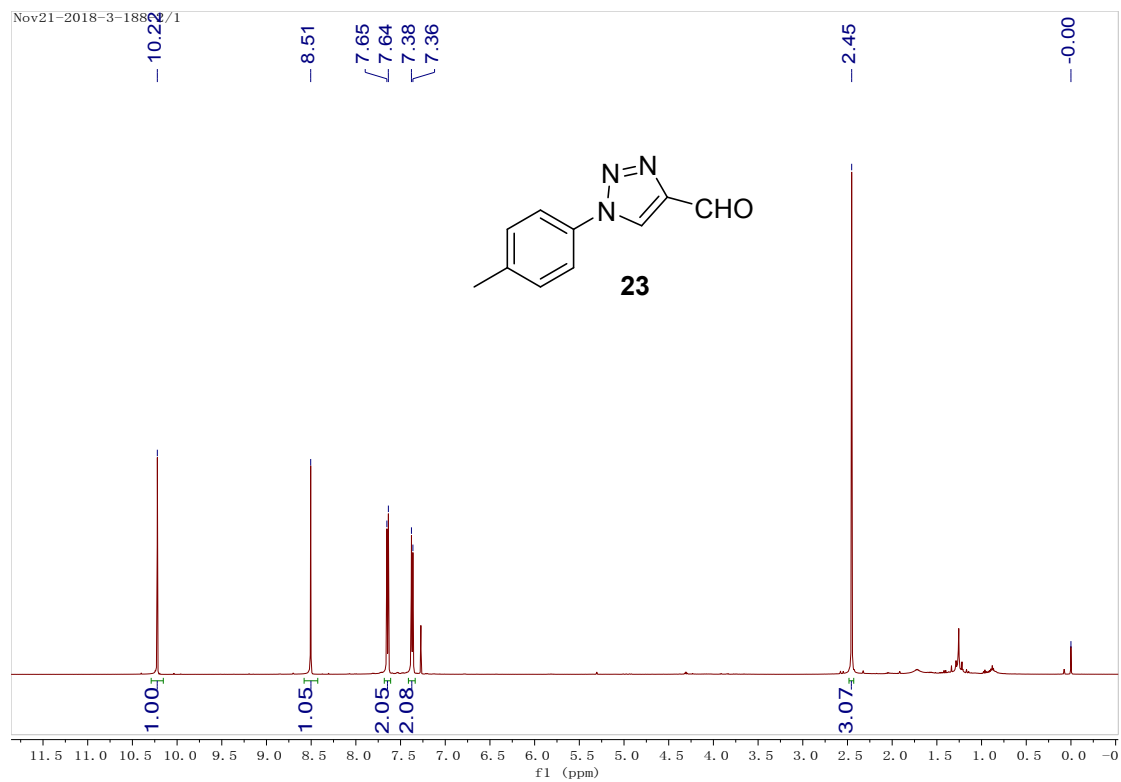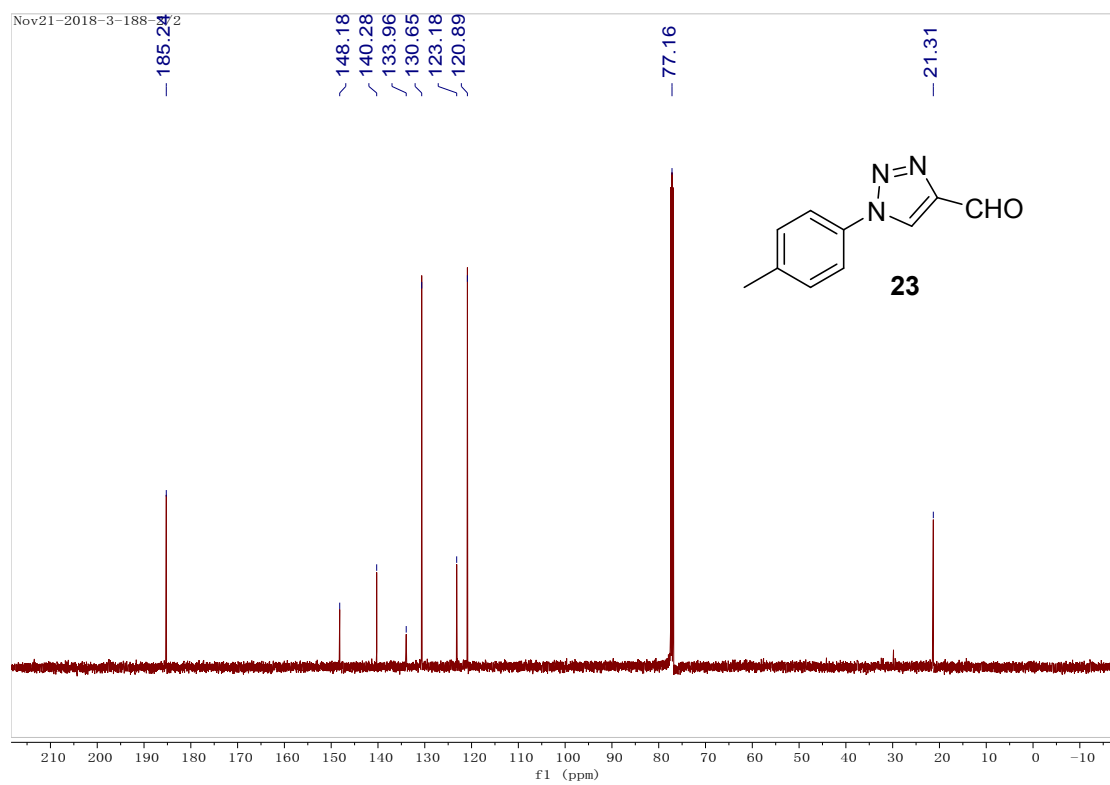



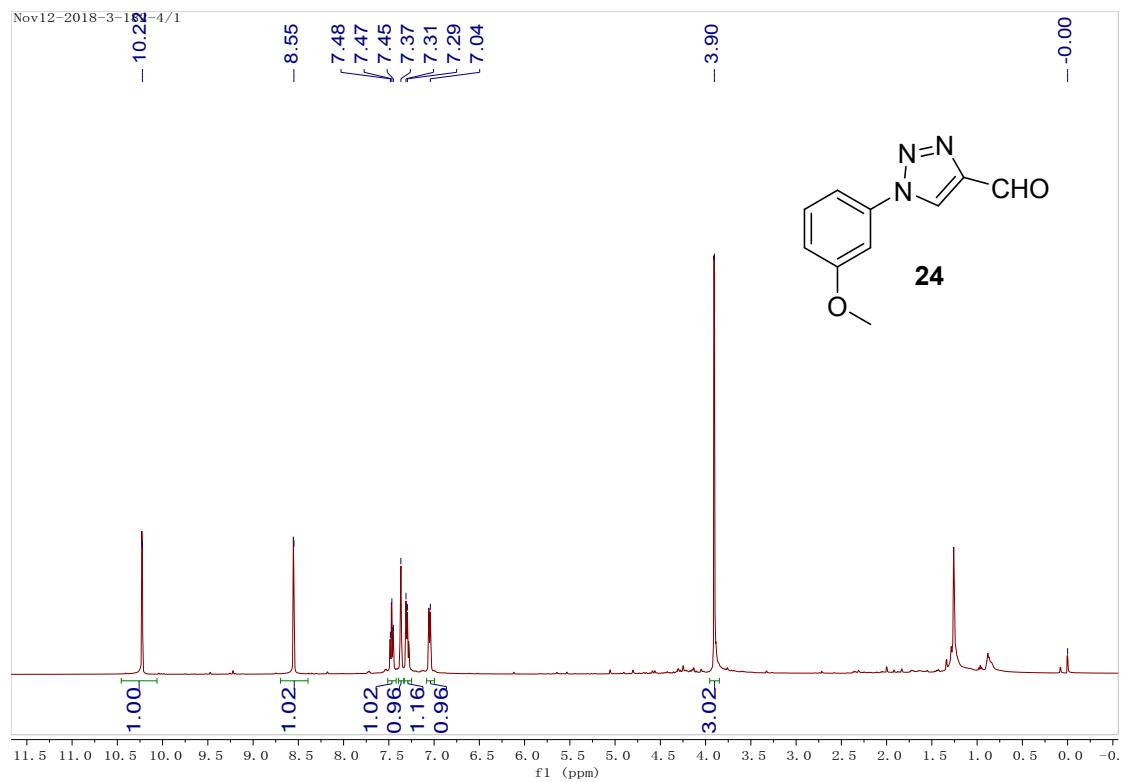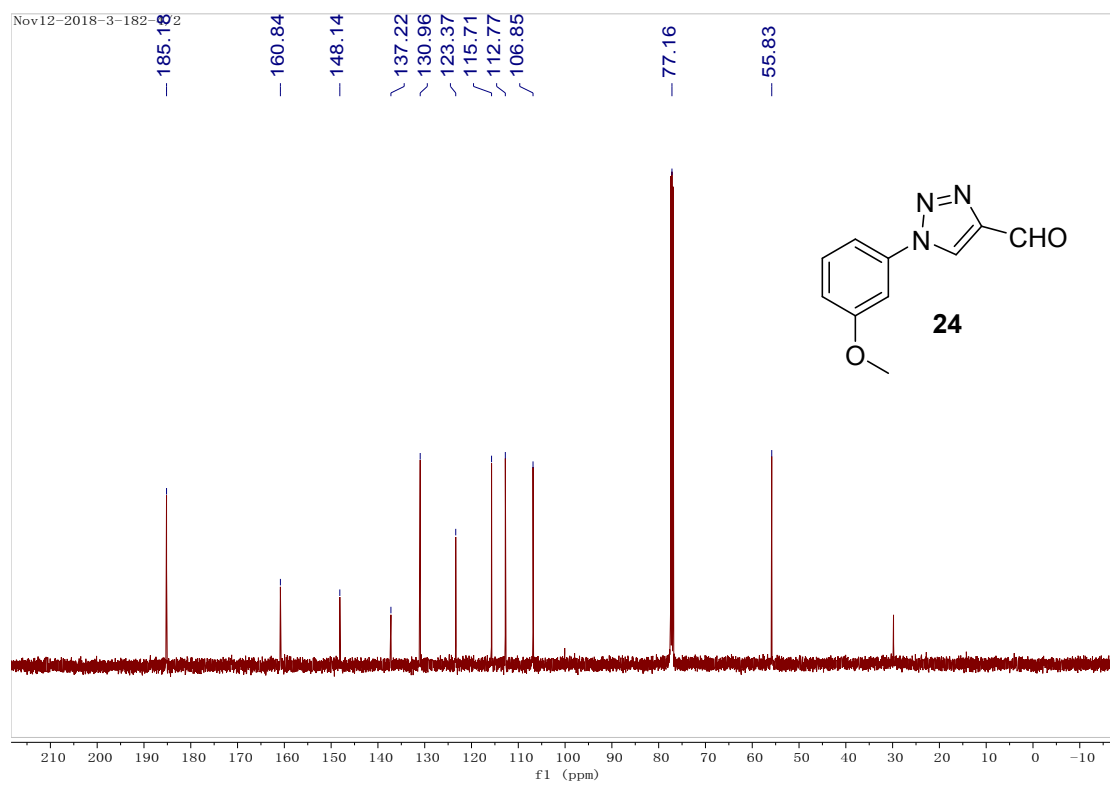

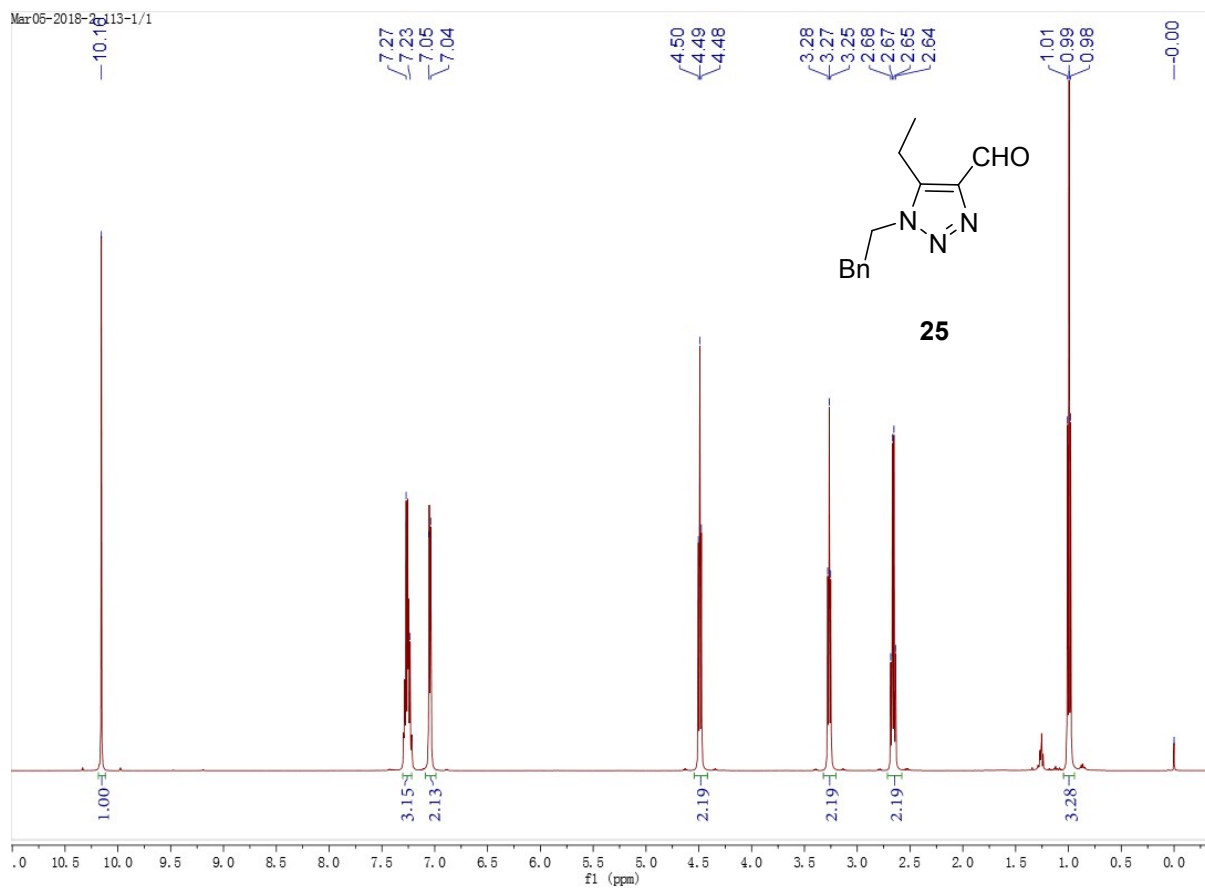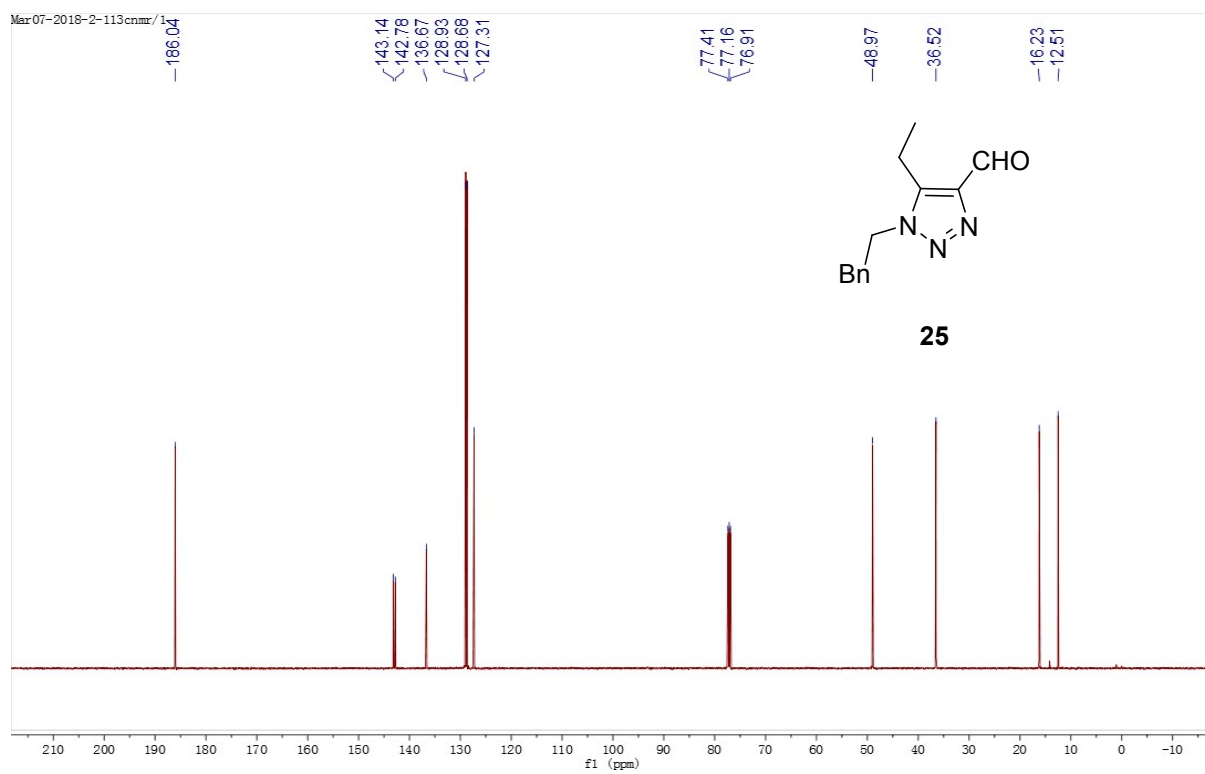

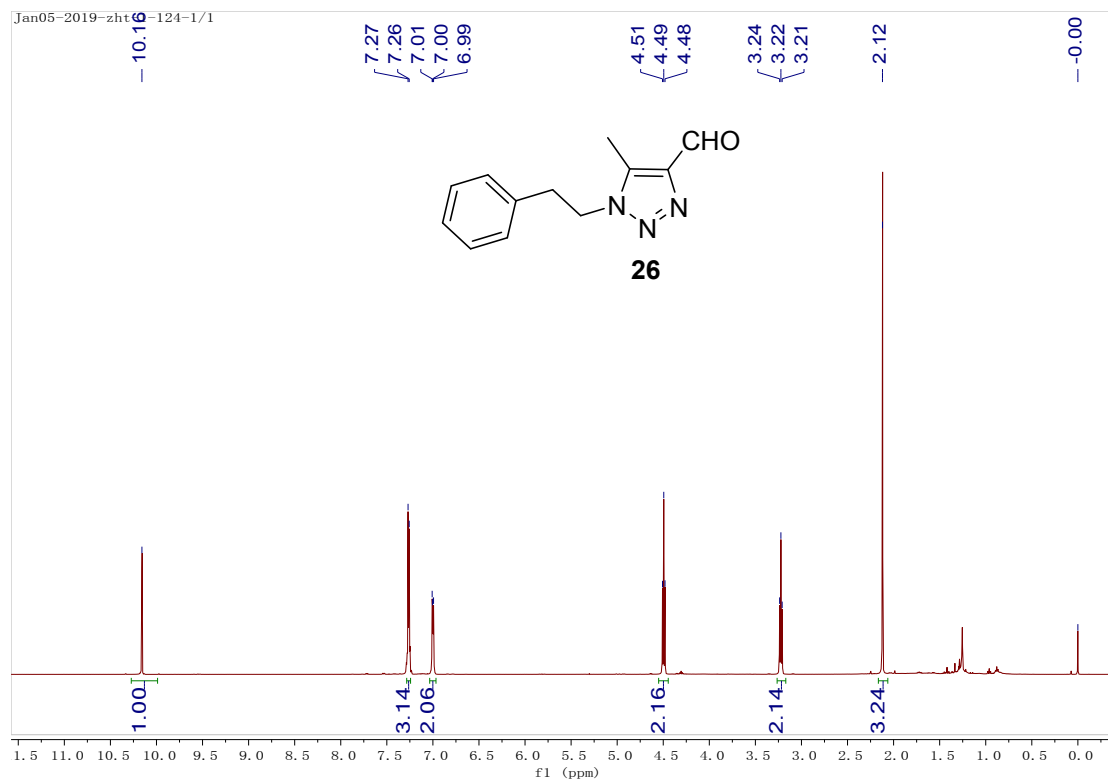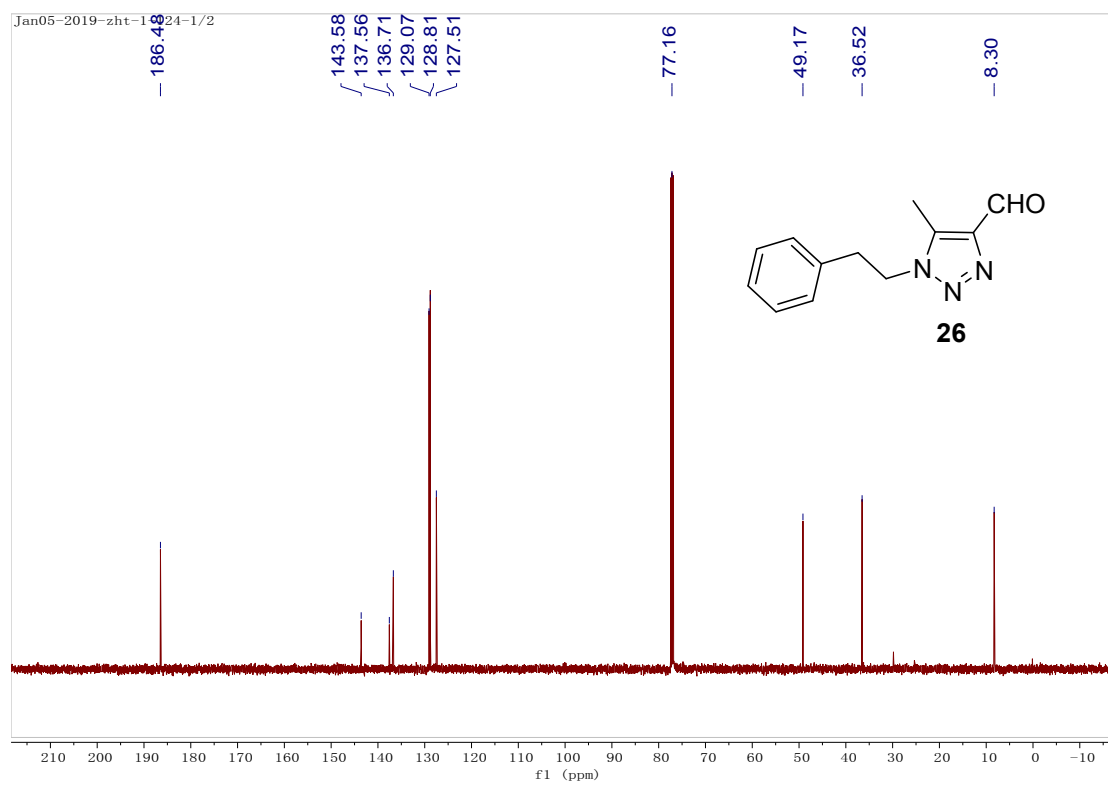

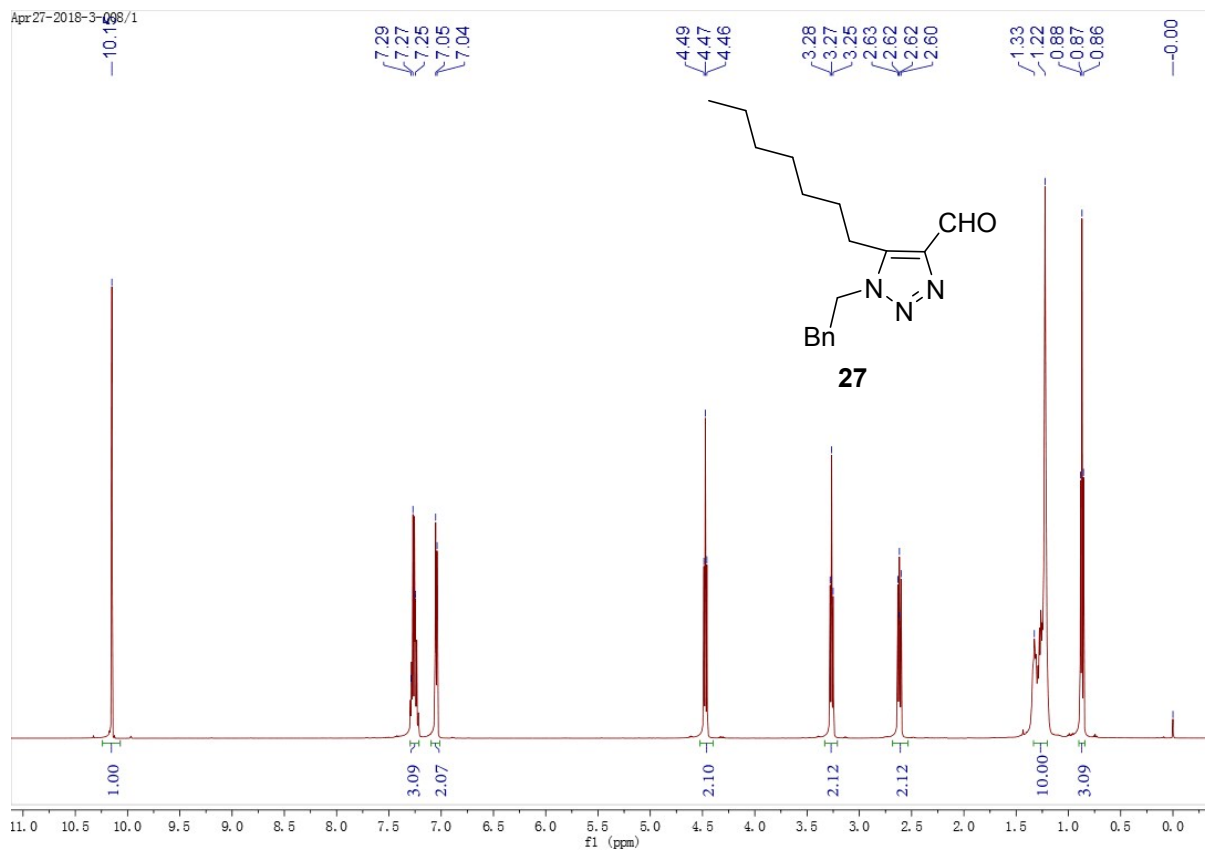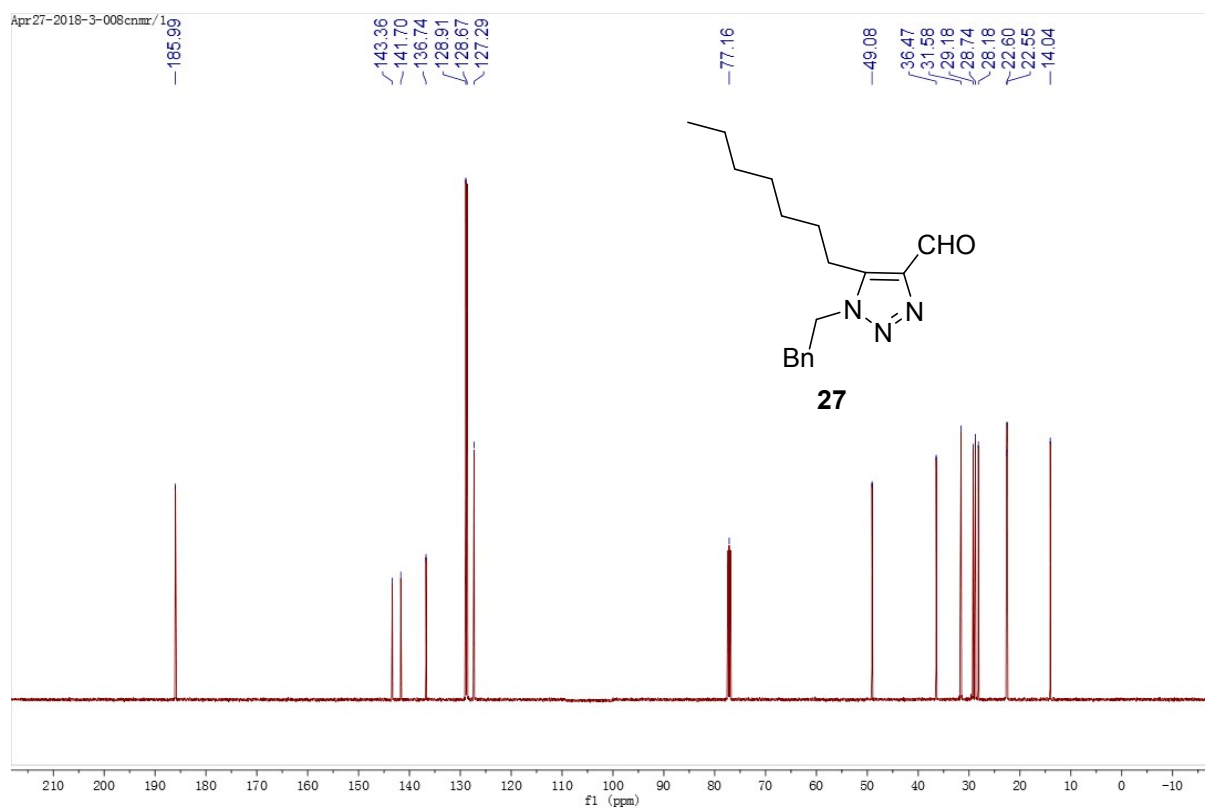

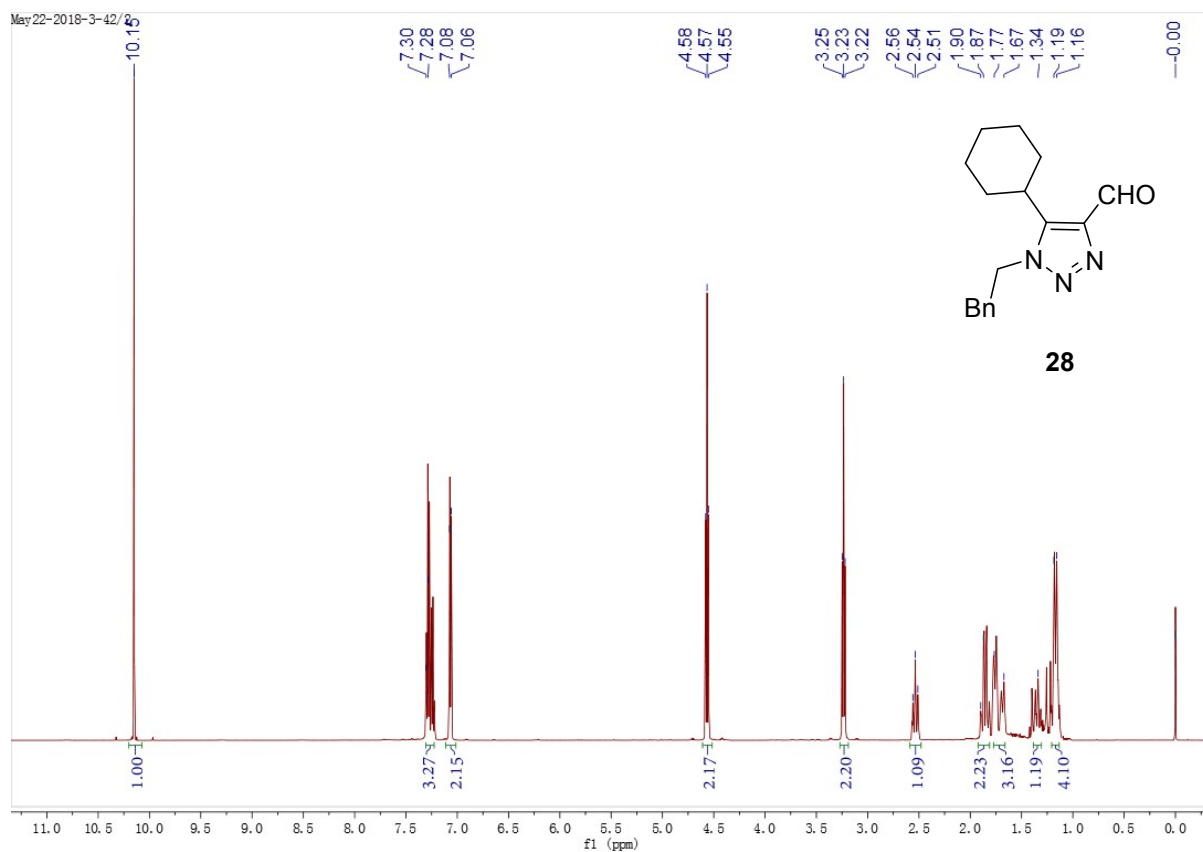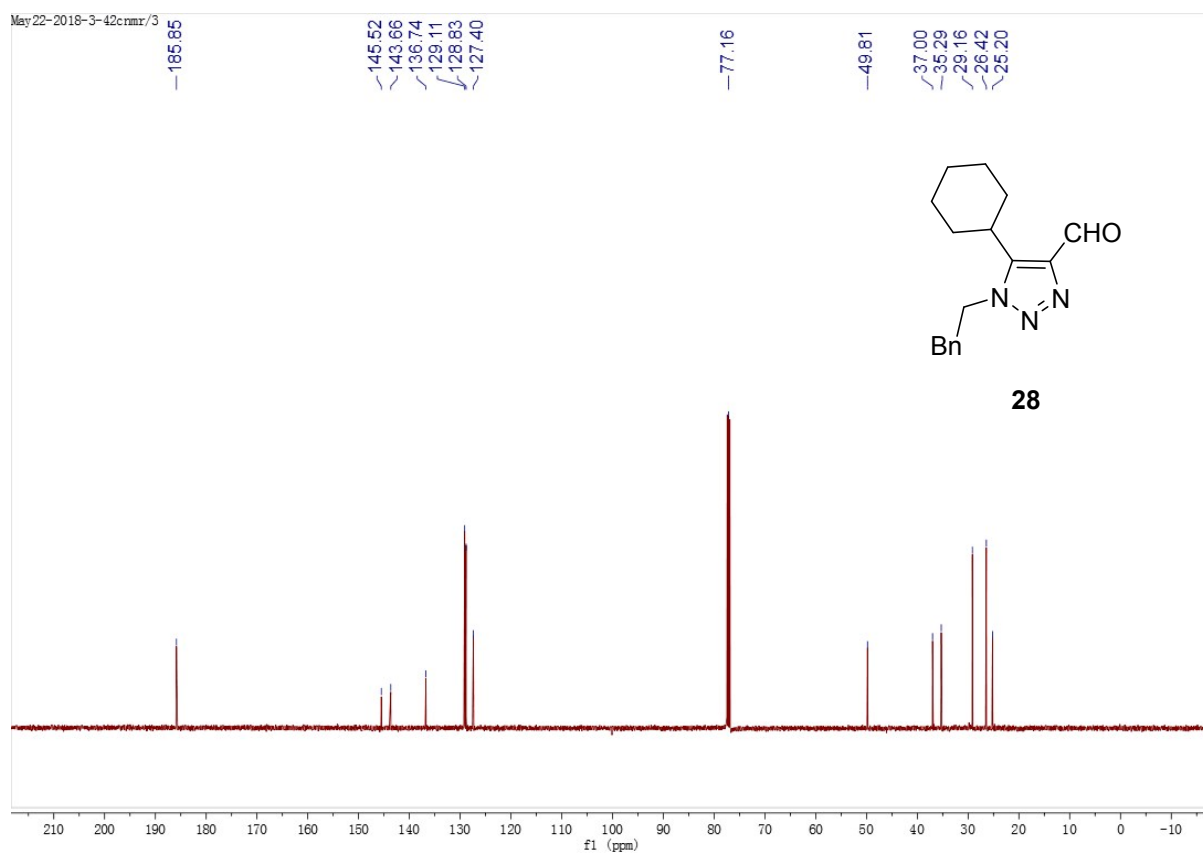

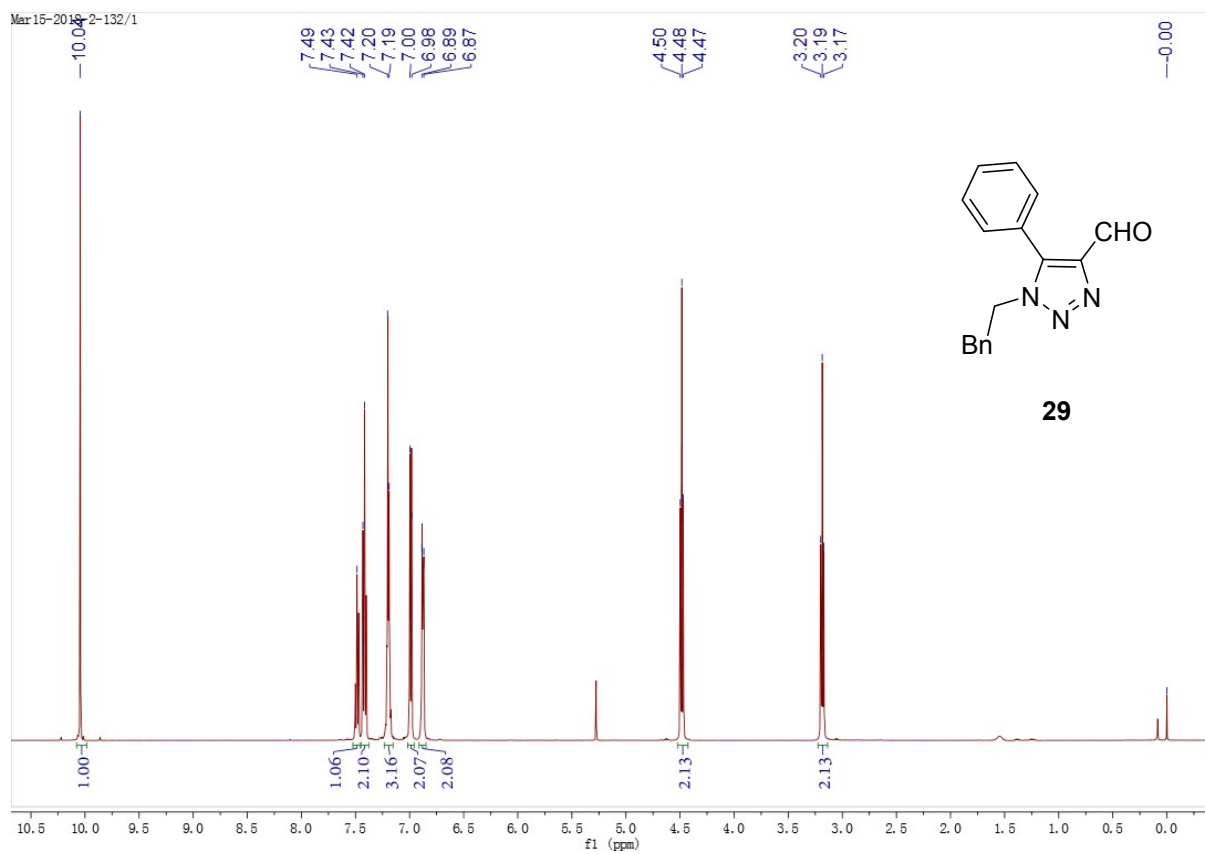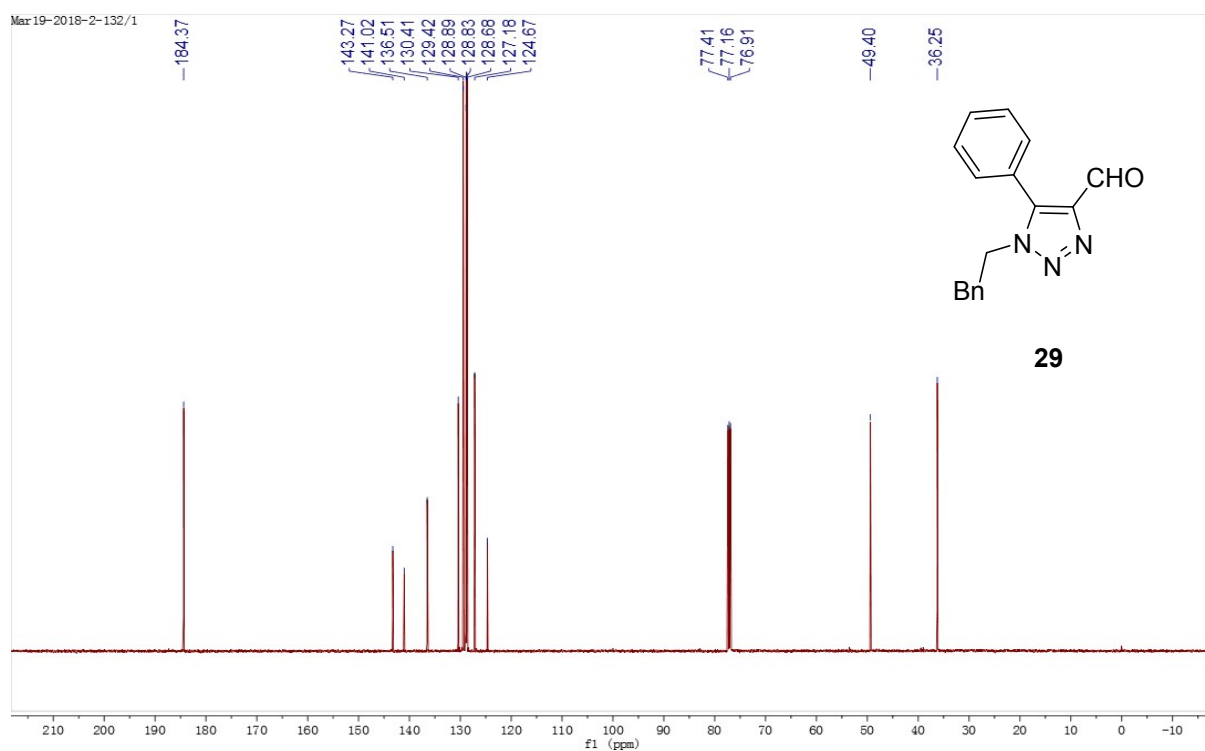

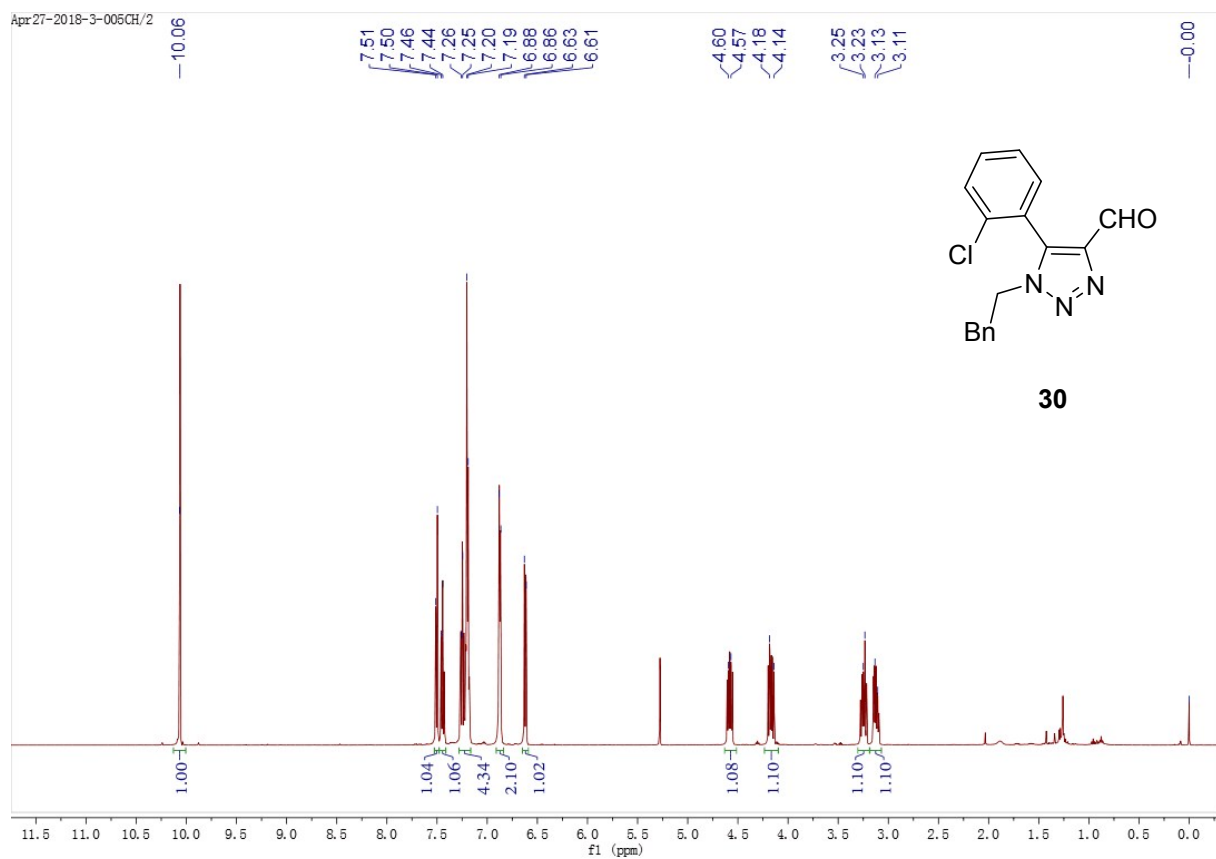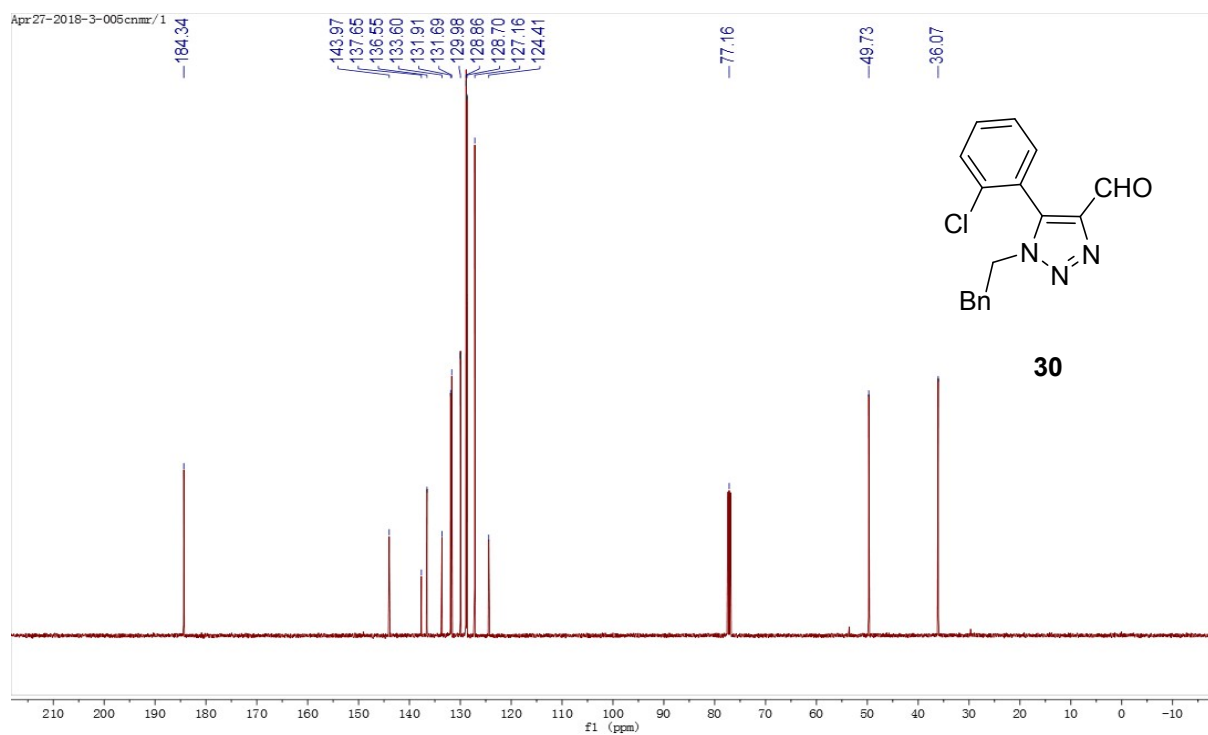

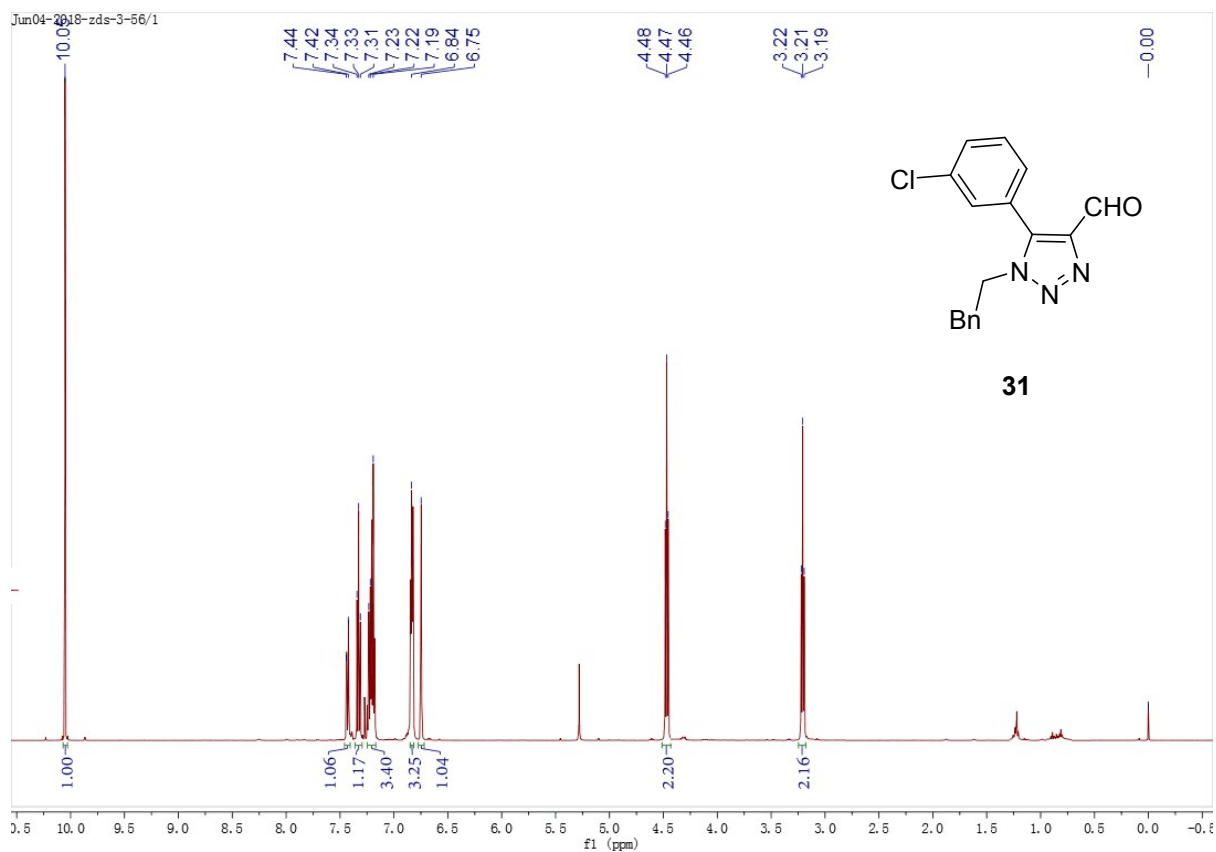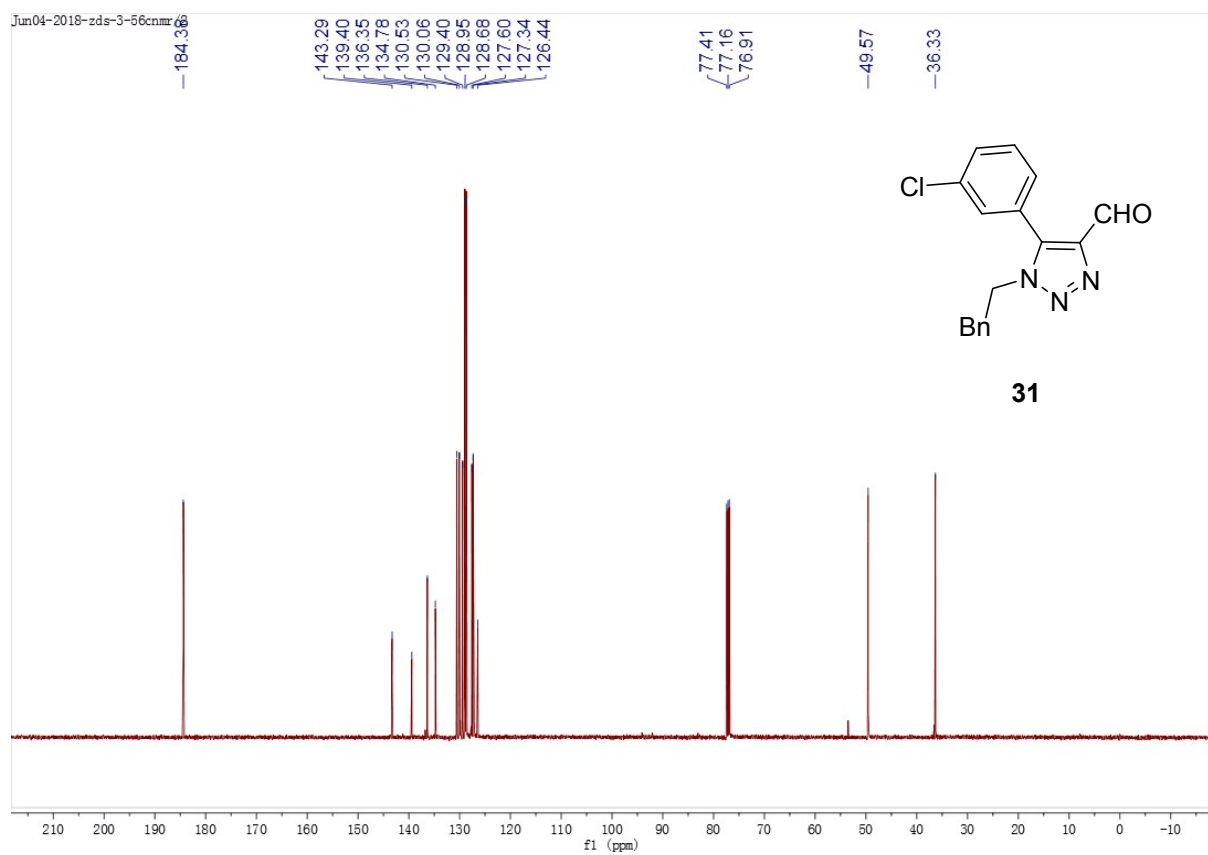



Apr 27-2018-3-007/1

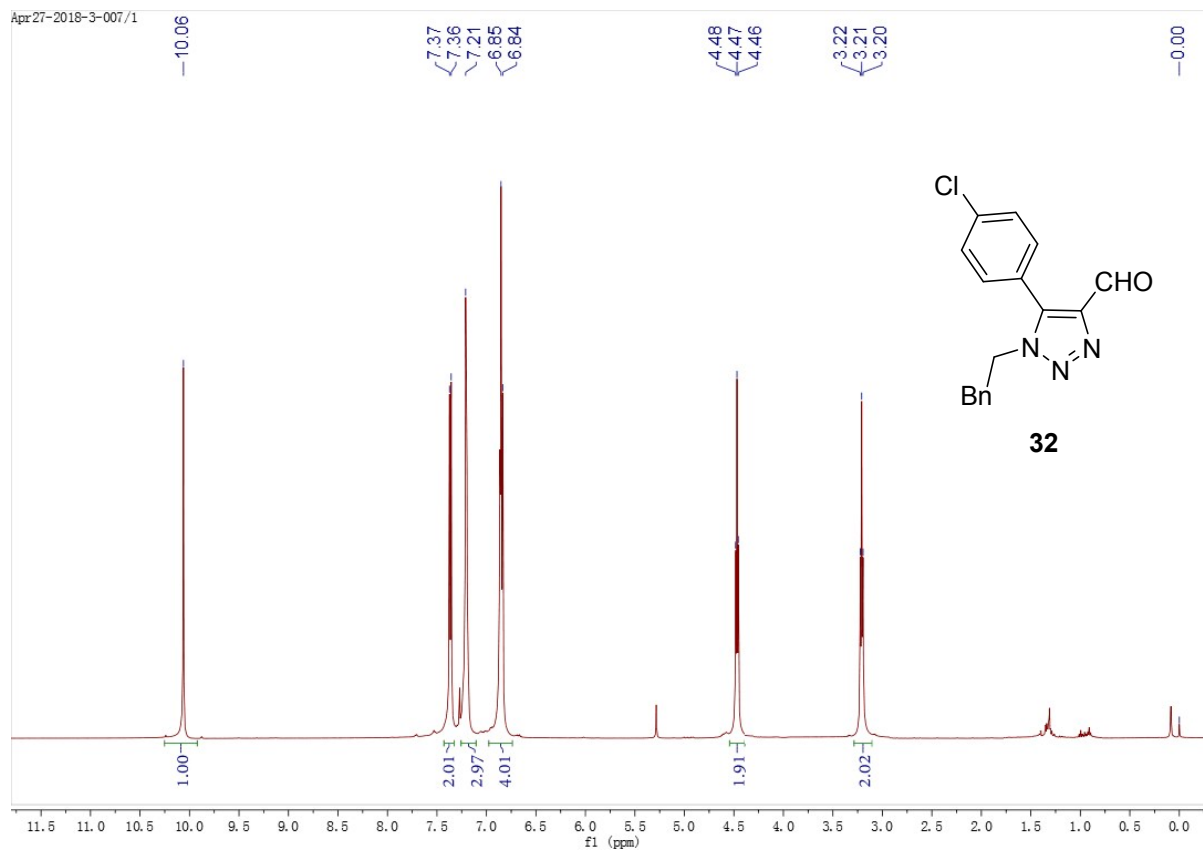

Apr 27-2018-3-007 nmr/1

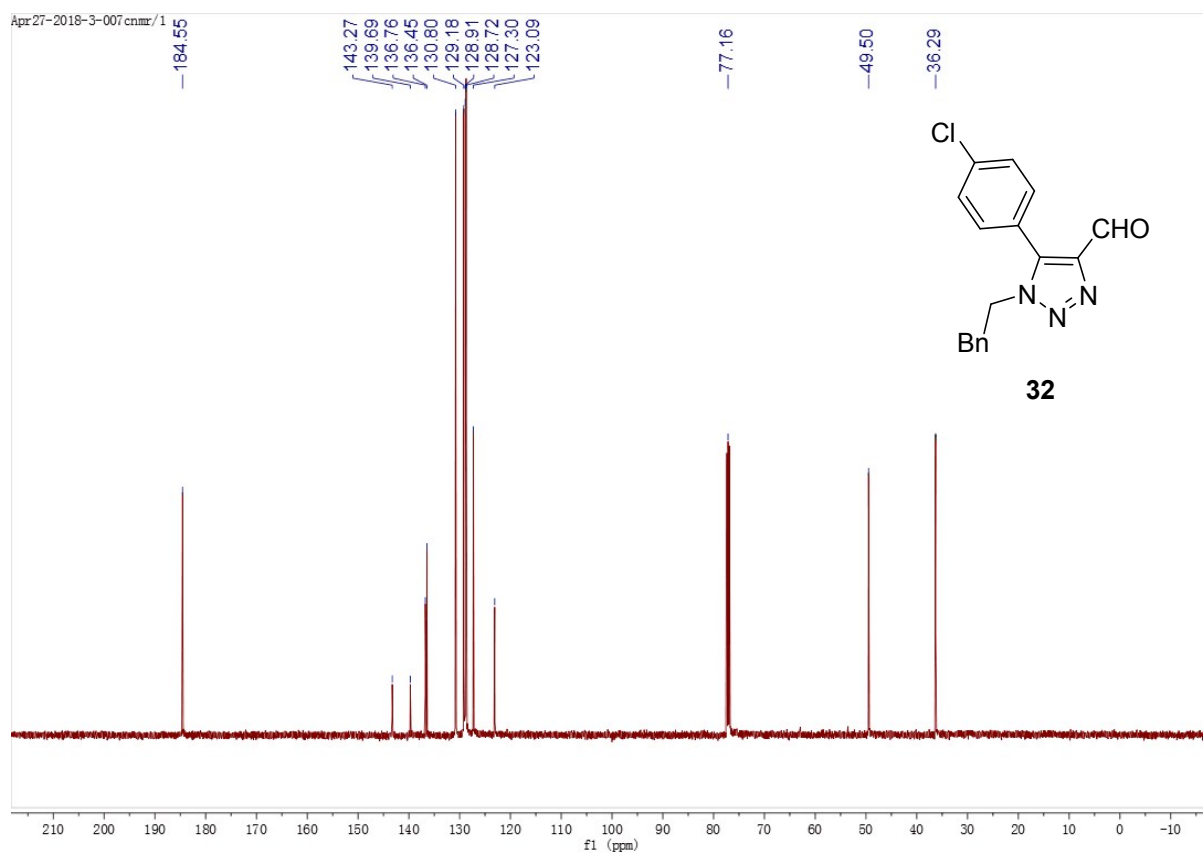

May08-2018-3-25-2/1

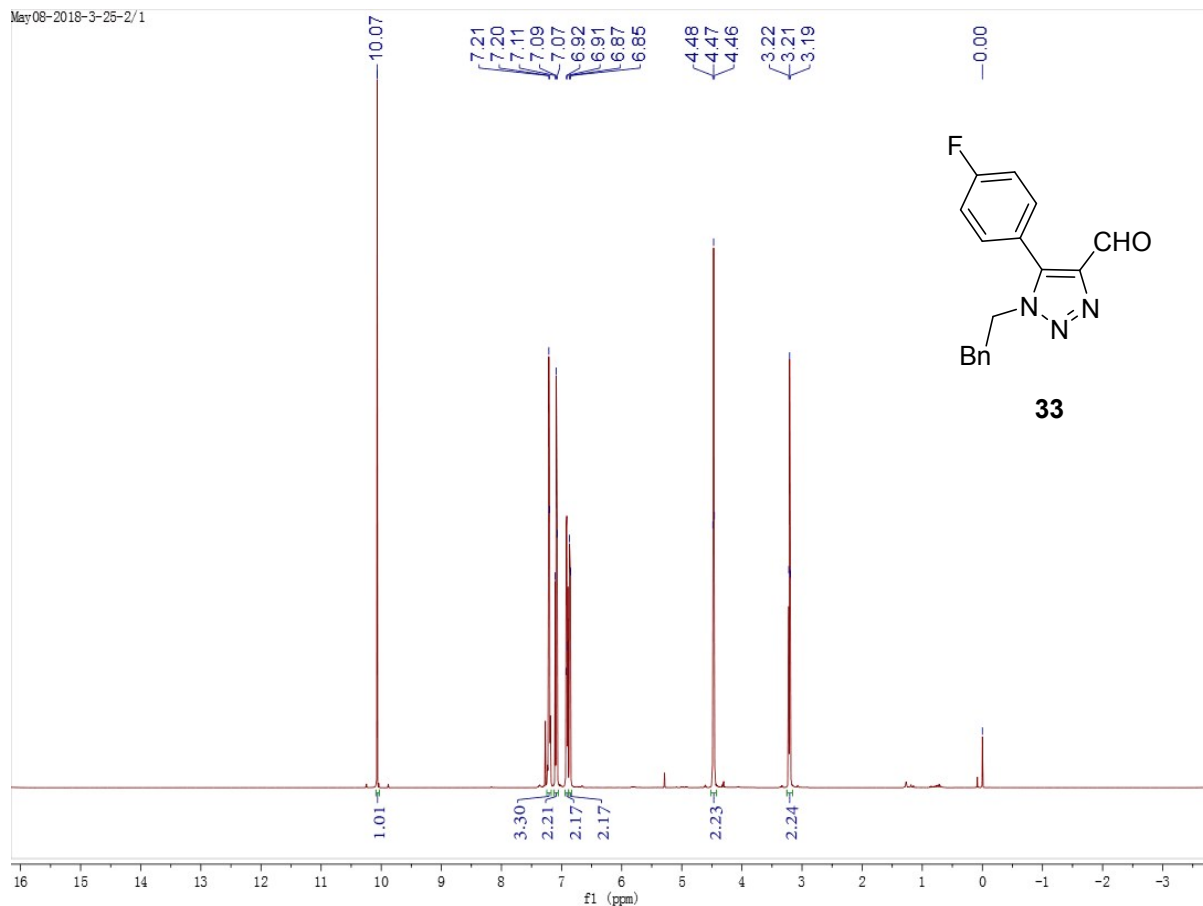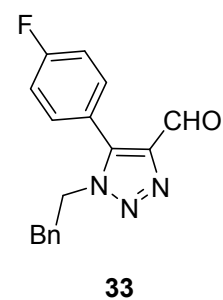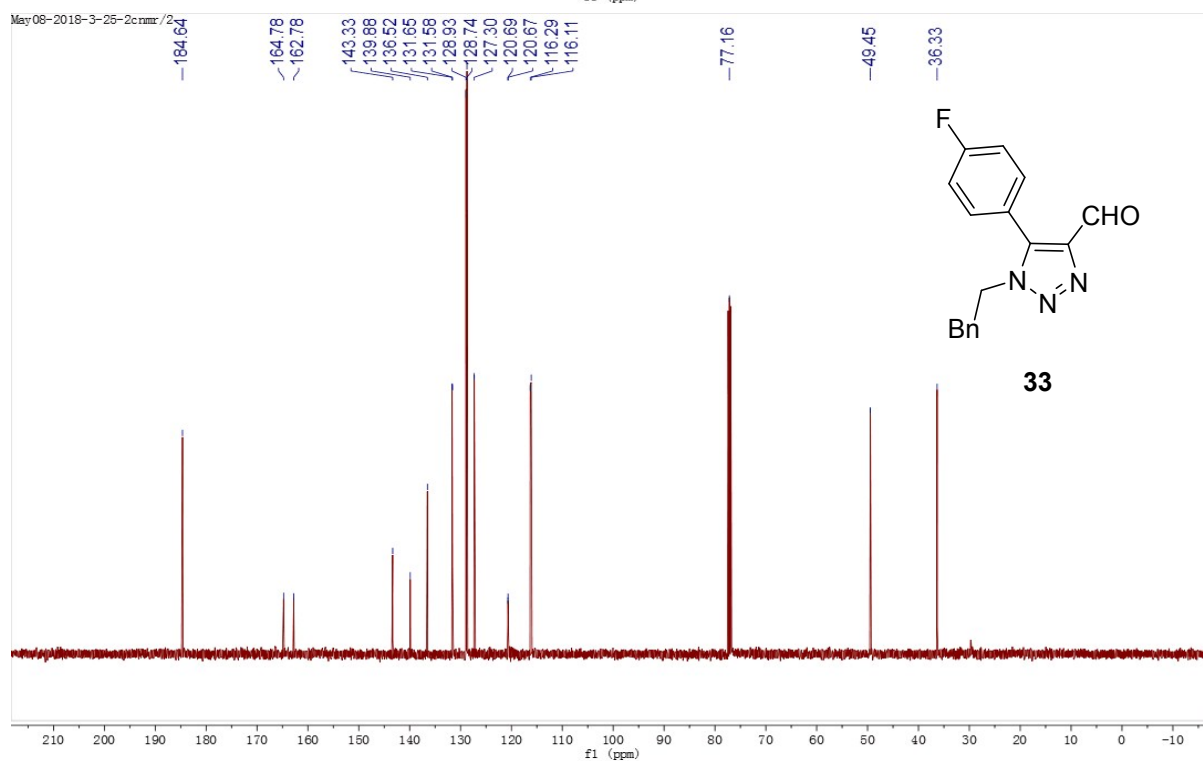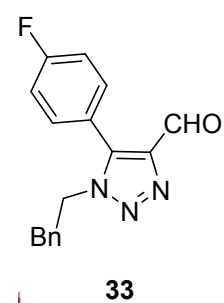

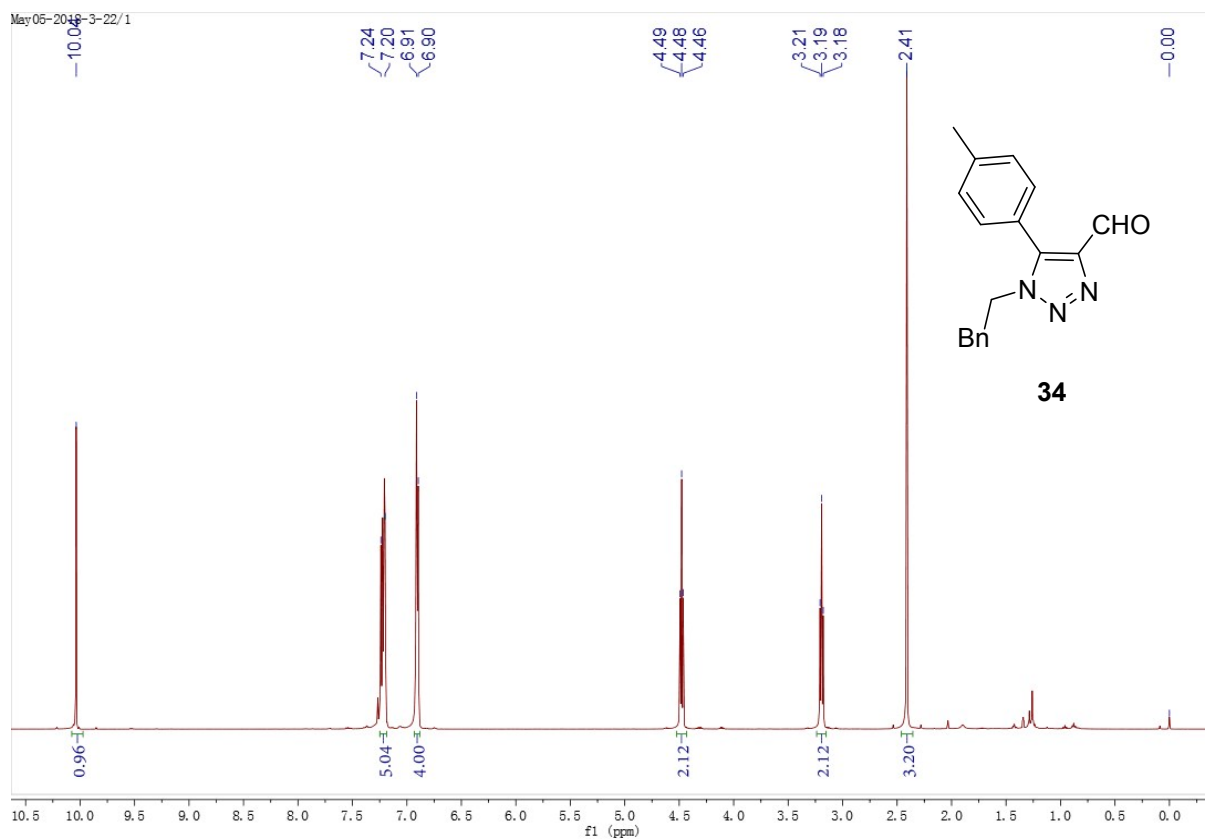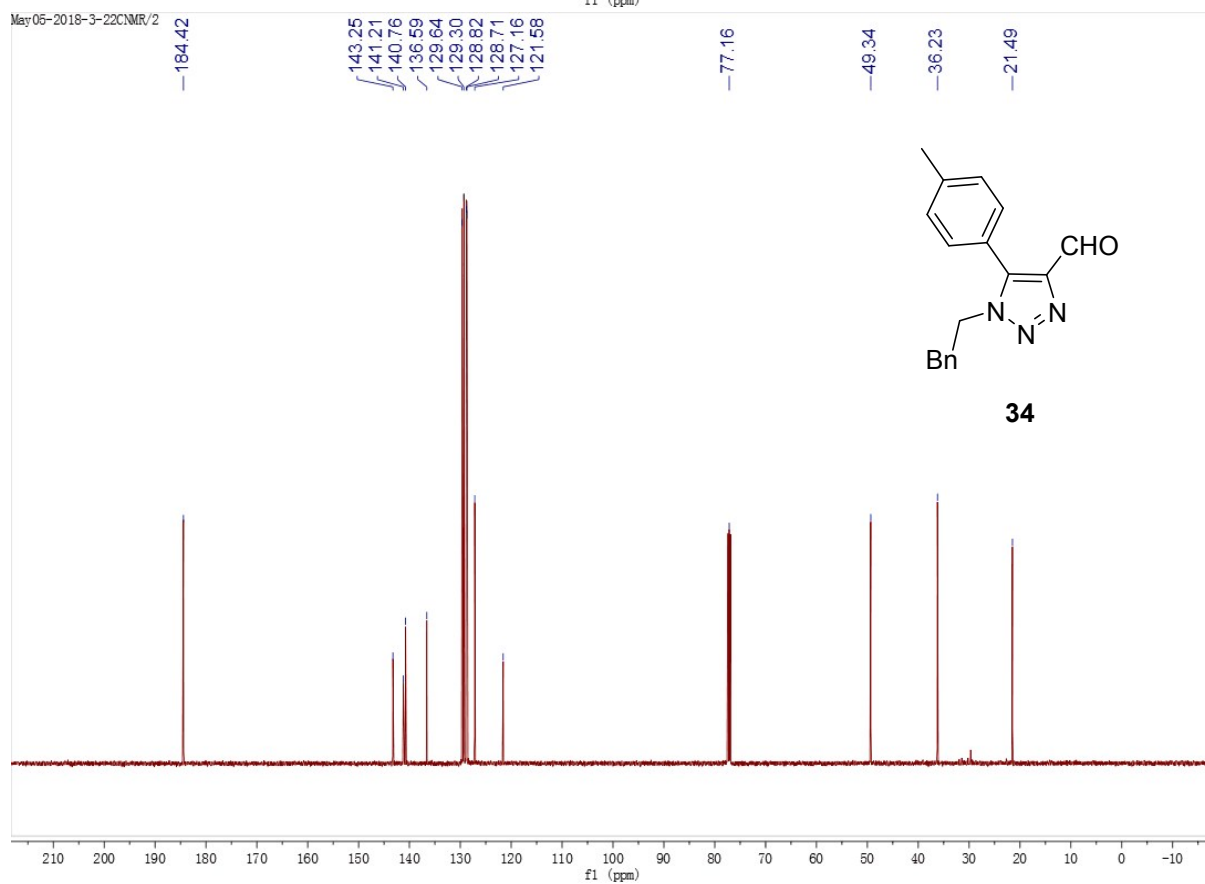

May 22-2018-3-43/1

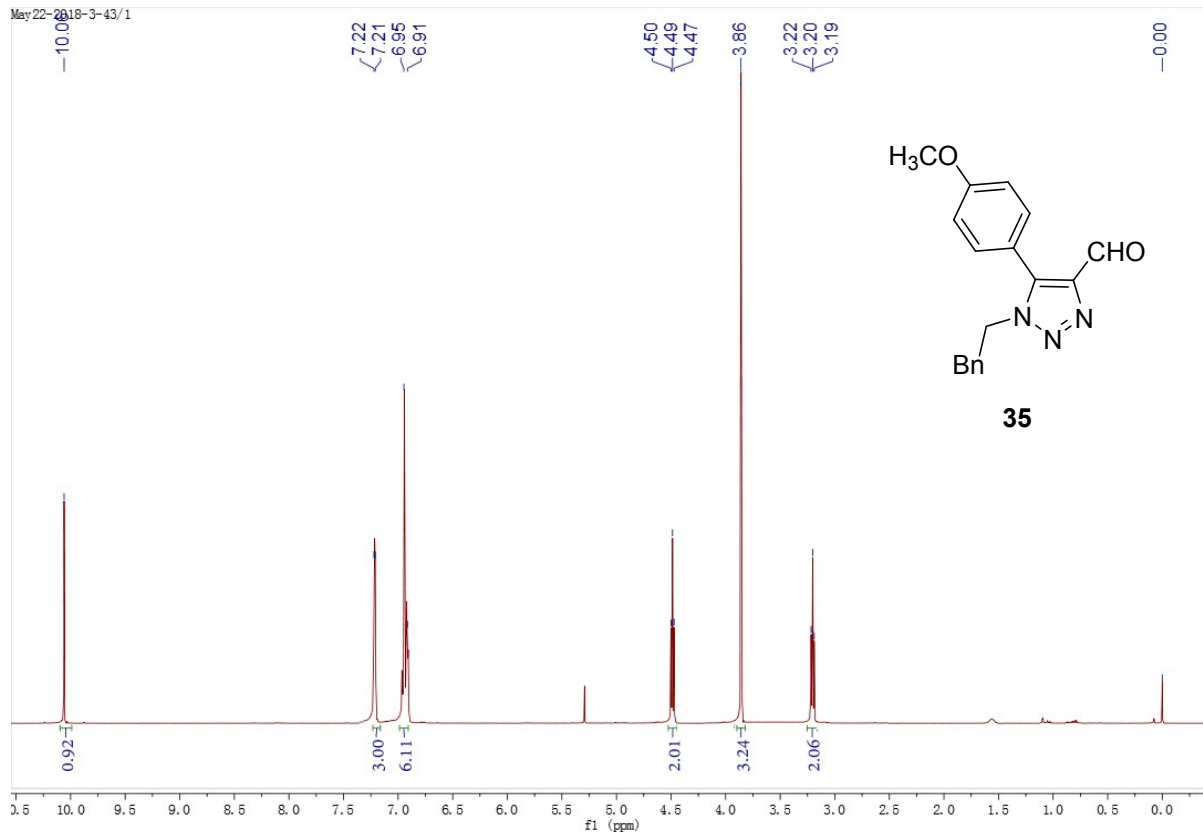

May 22-2018-3-43:nmr/2

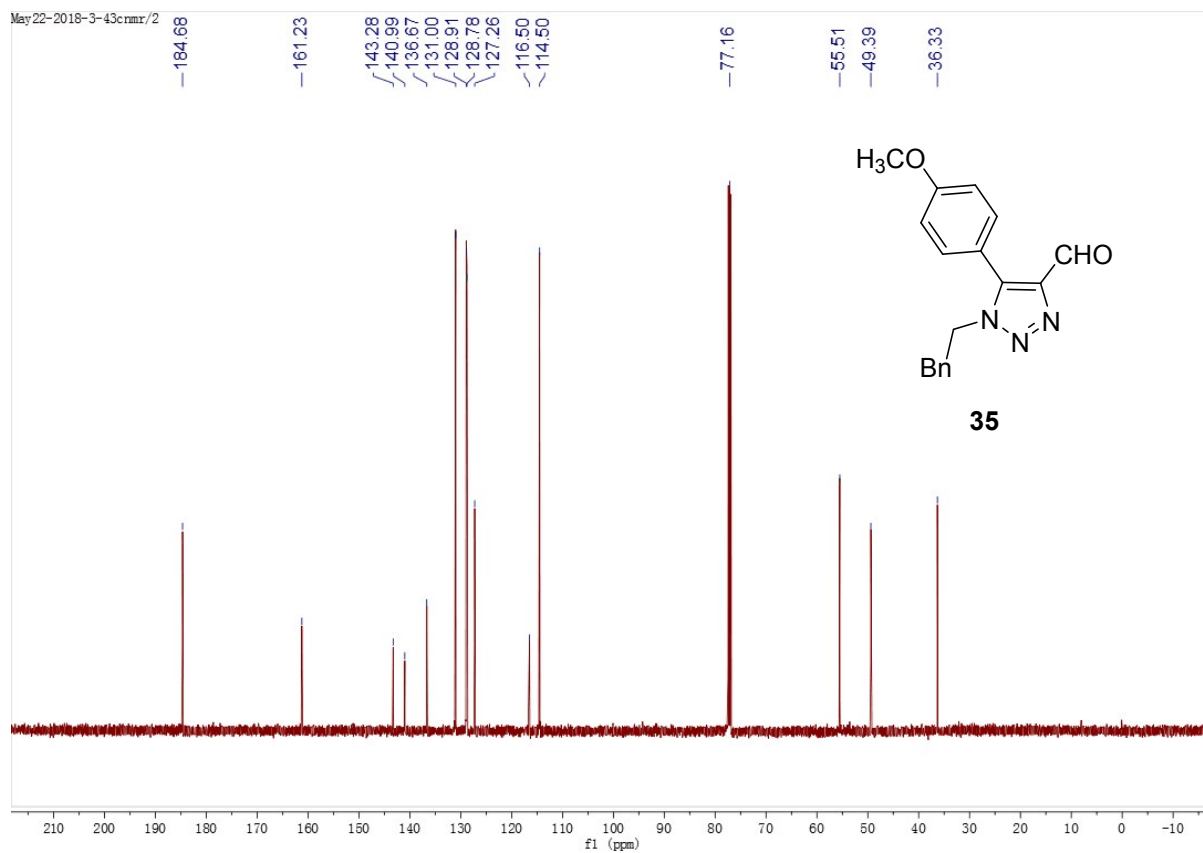

May01-2018-3-14/1

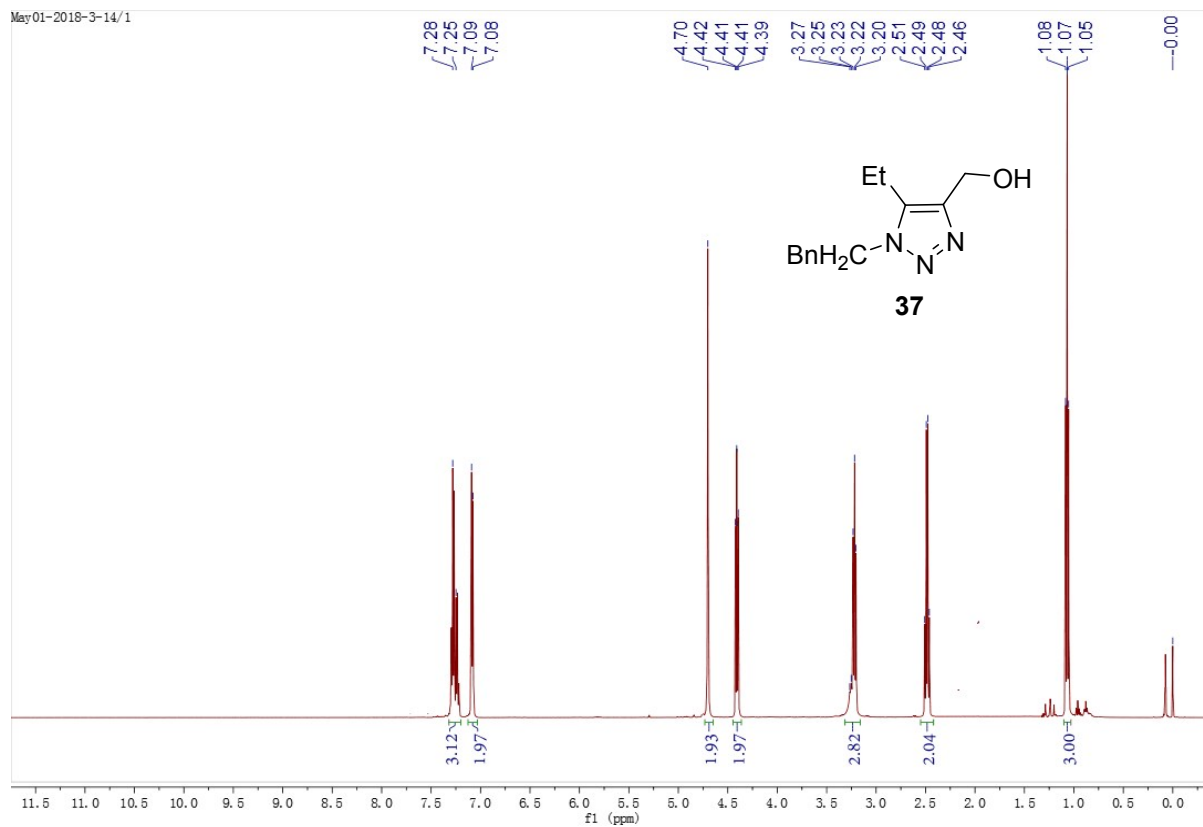

May01-2018-3-14CNMR/2

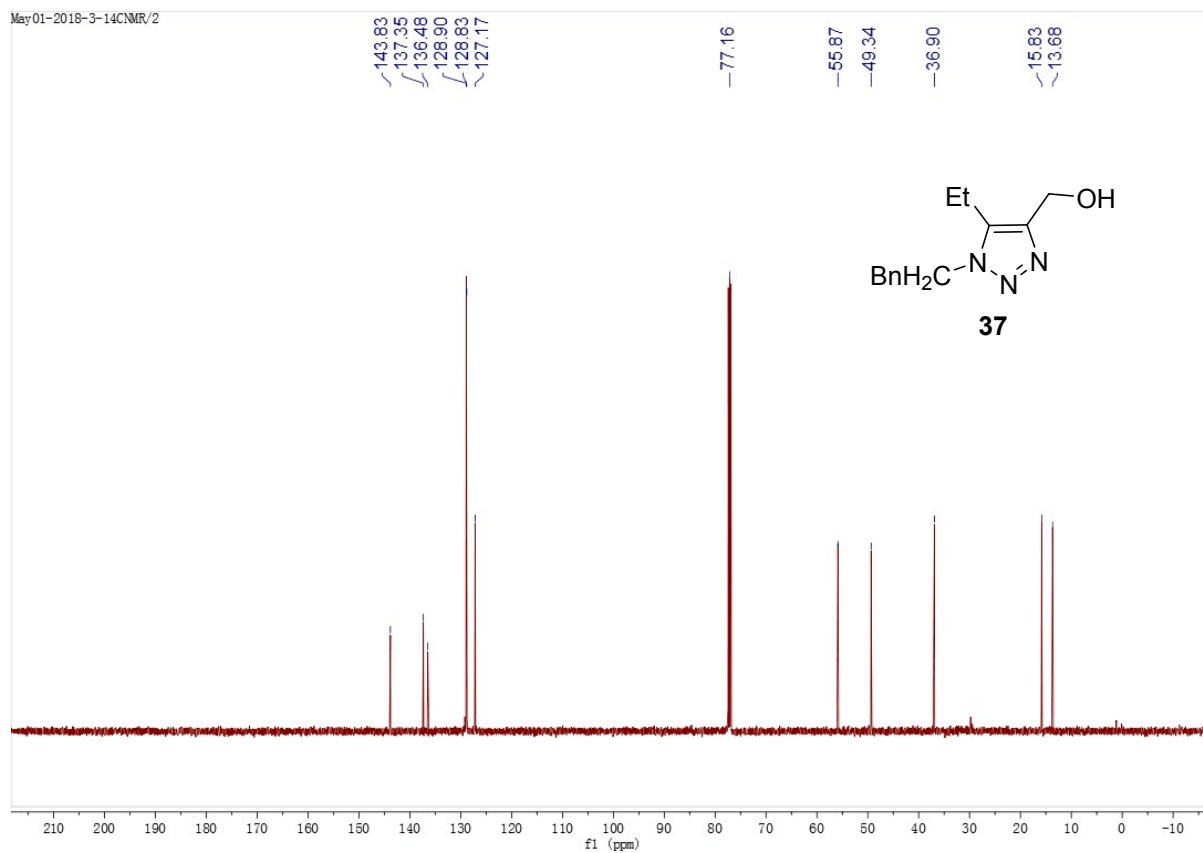

May 18-2018-3-20-new氧化成羧酸纯补/1

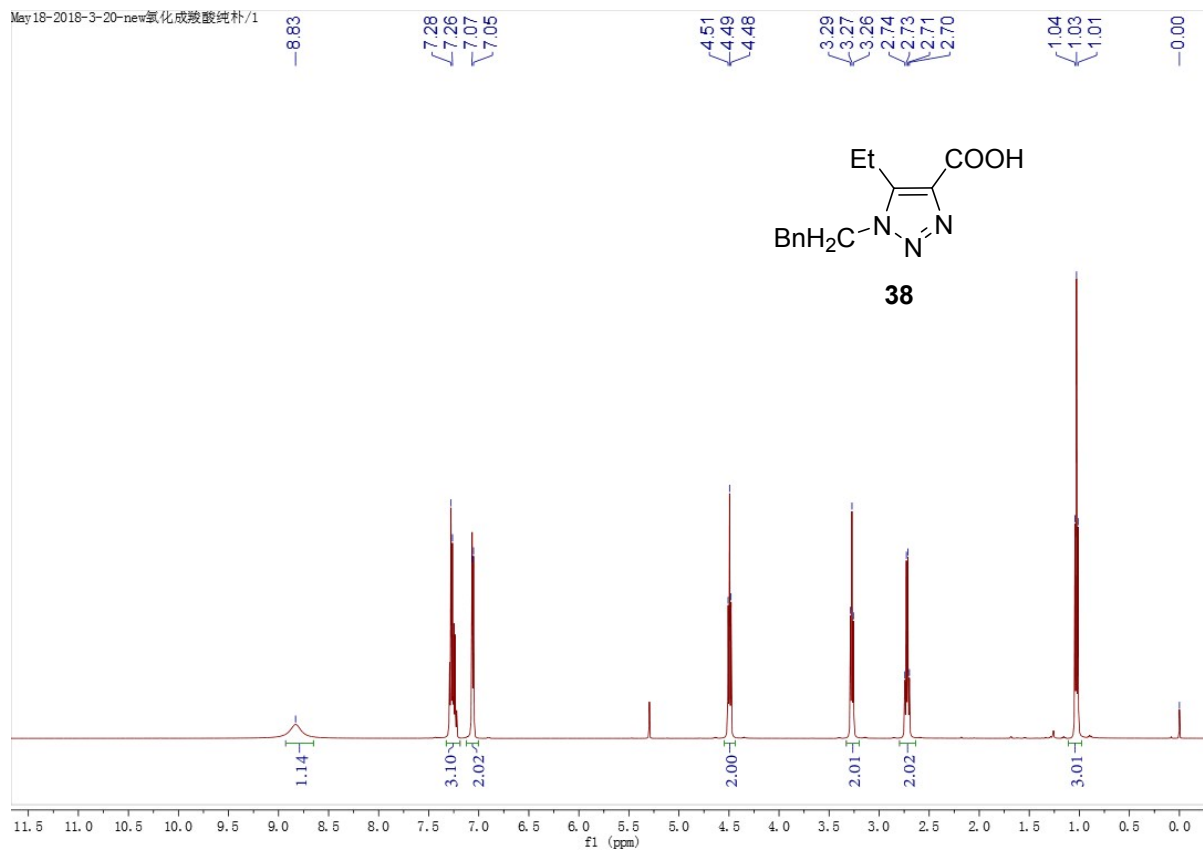

May 18-2018-3-20-cnmr纯补/2

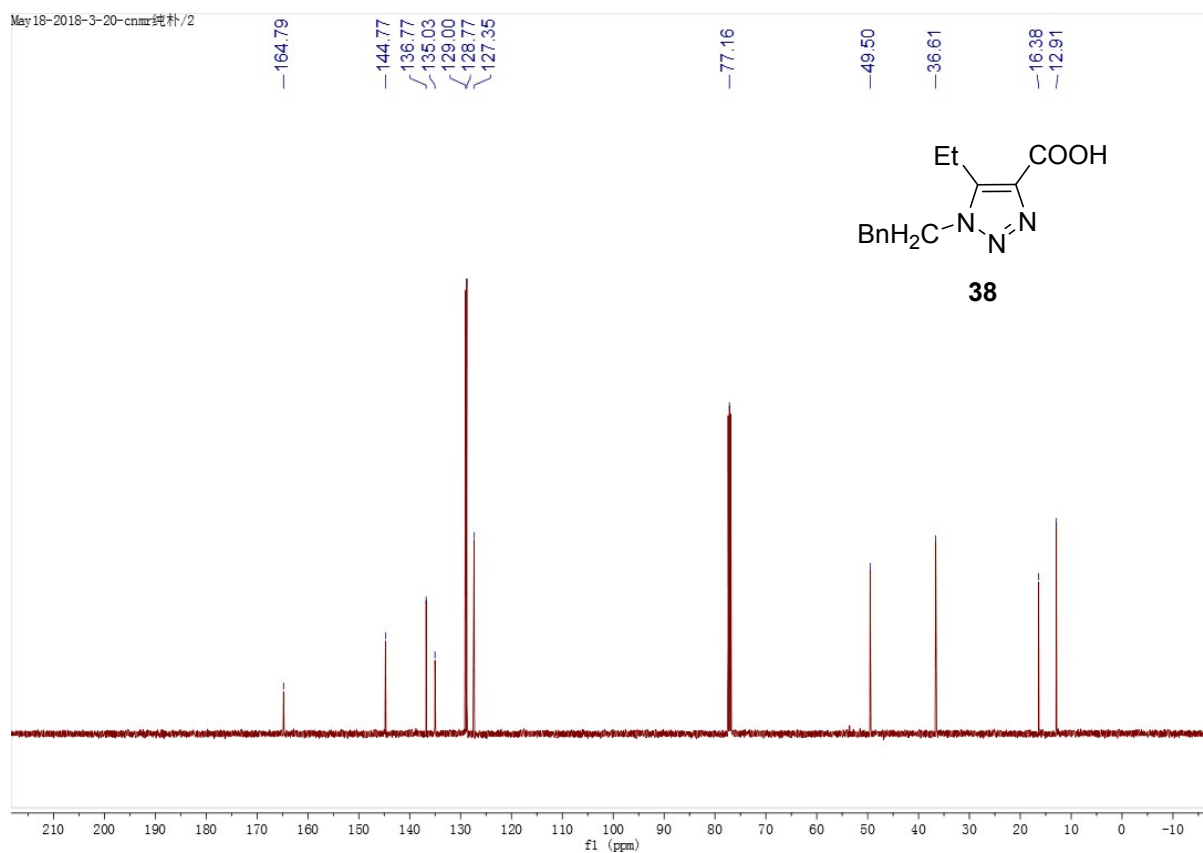

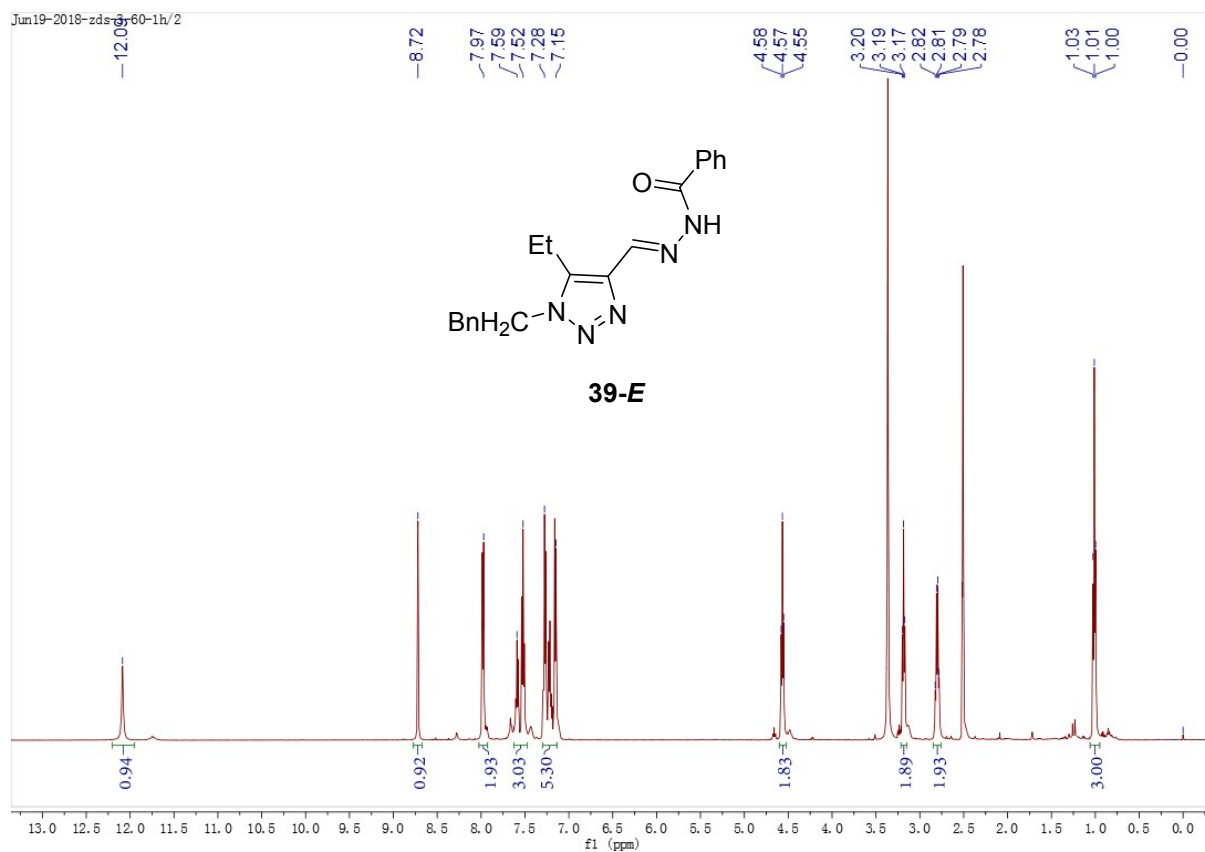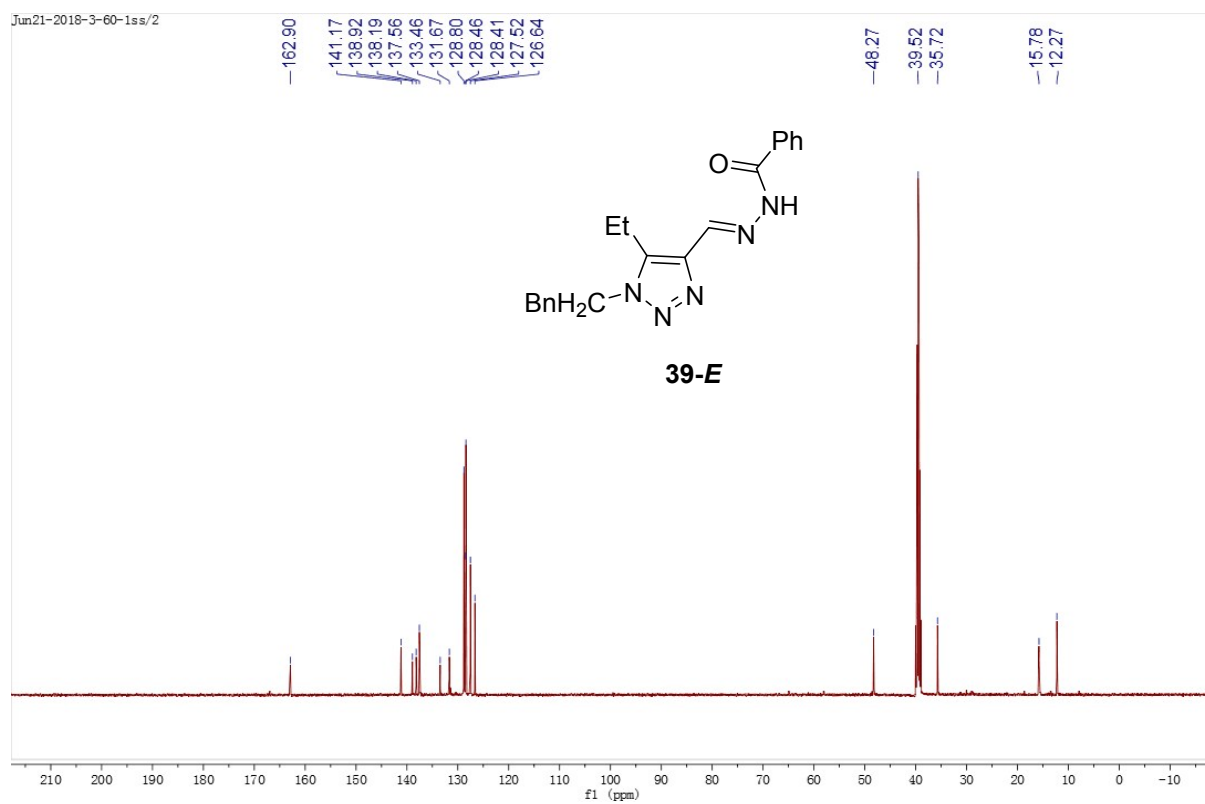

Jun19-2018-zd63-60-2h/2

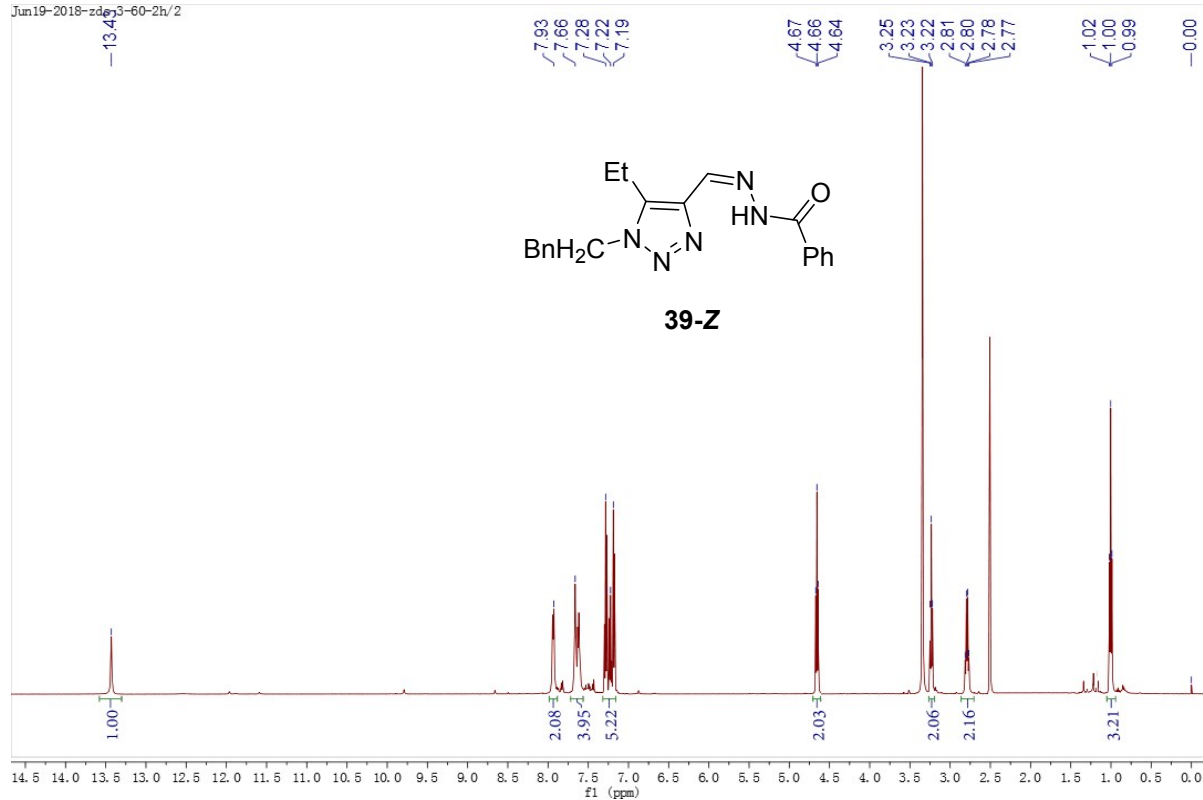

Jun21-2018-3-60-2sss/2

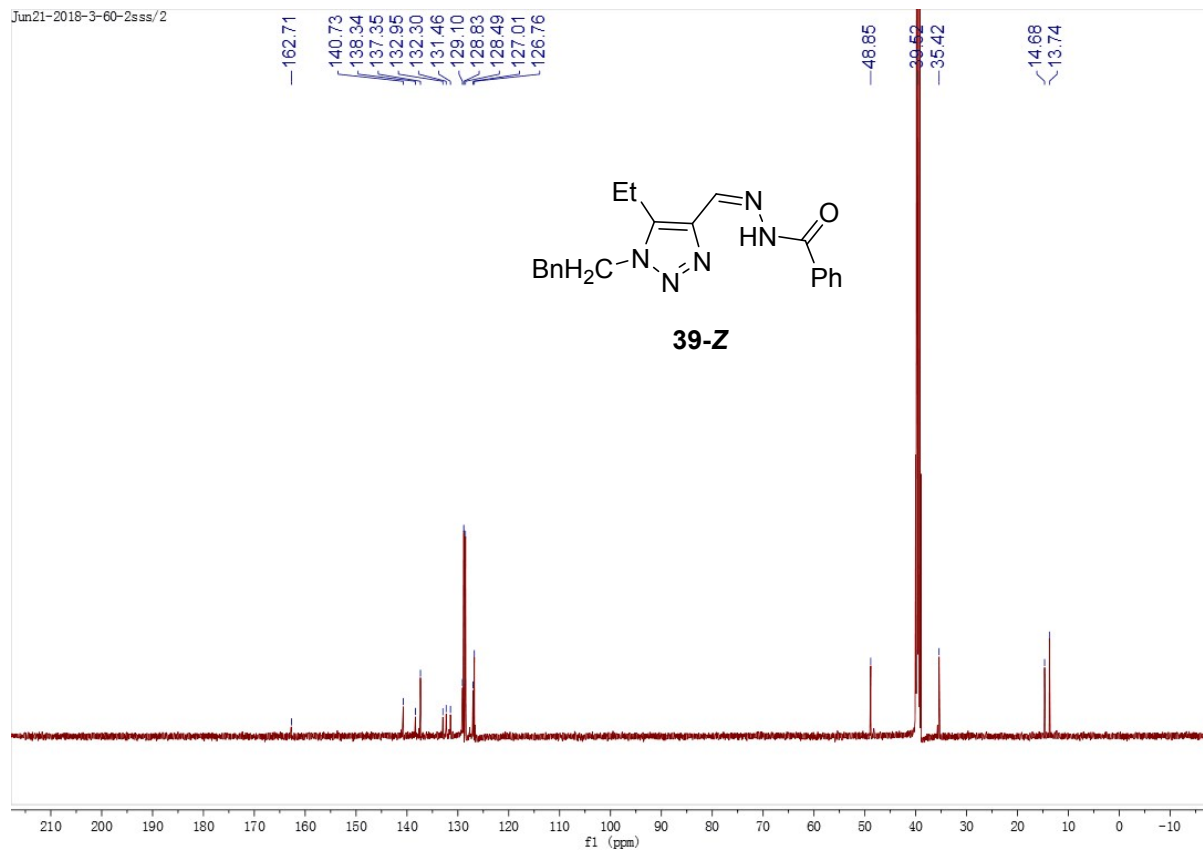



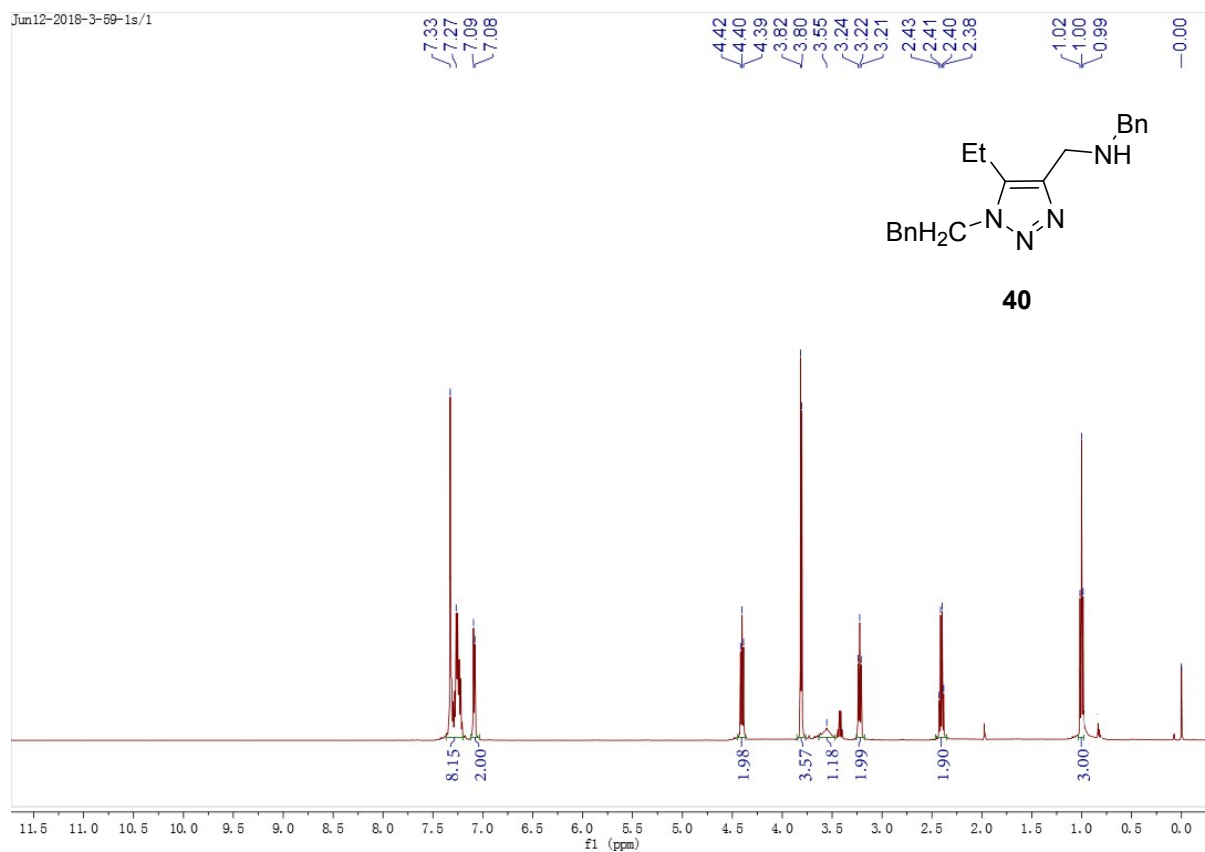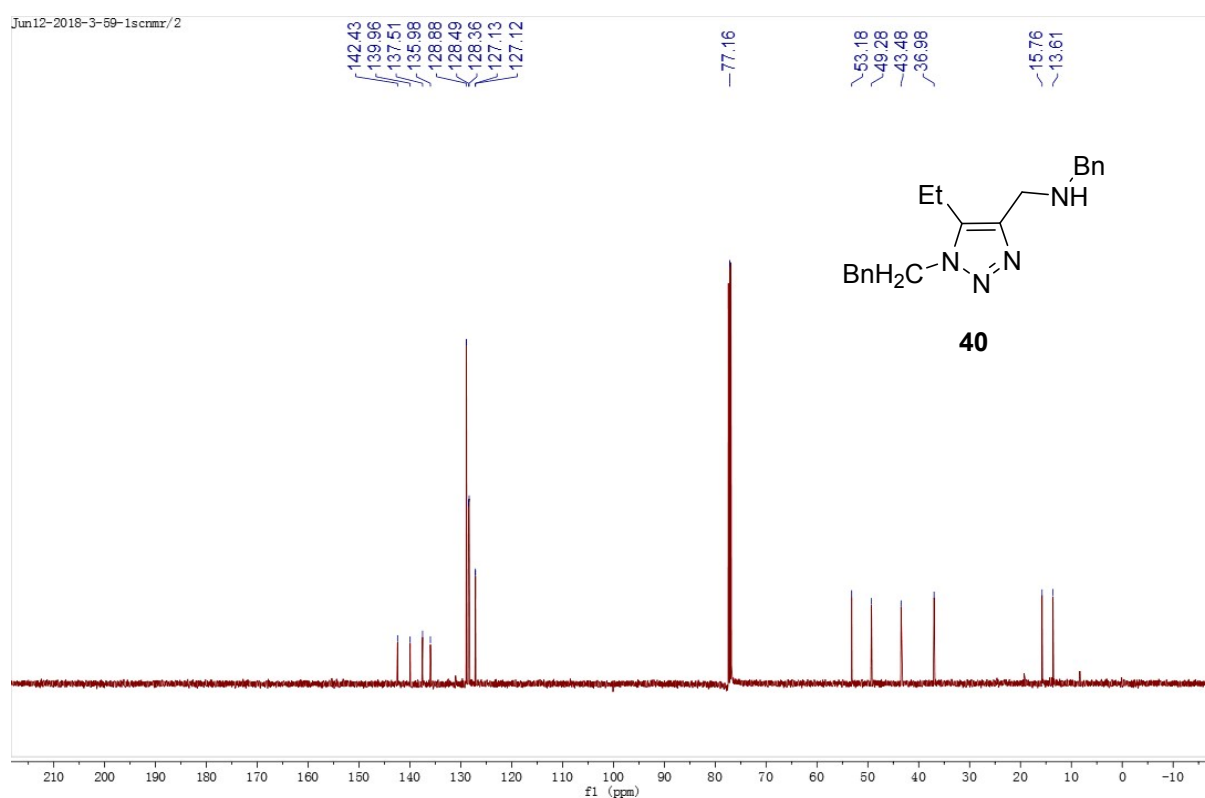

Jun12-2018-3-57/1

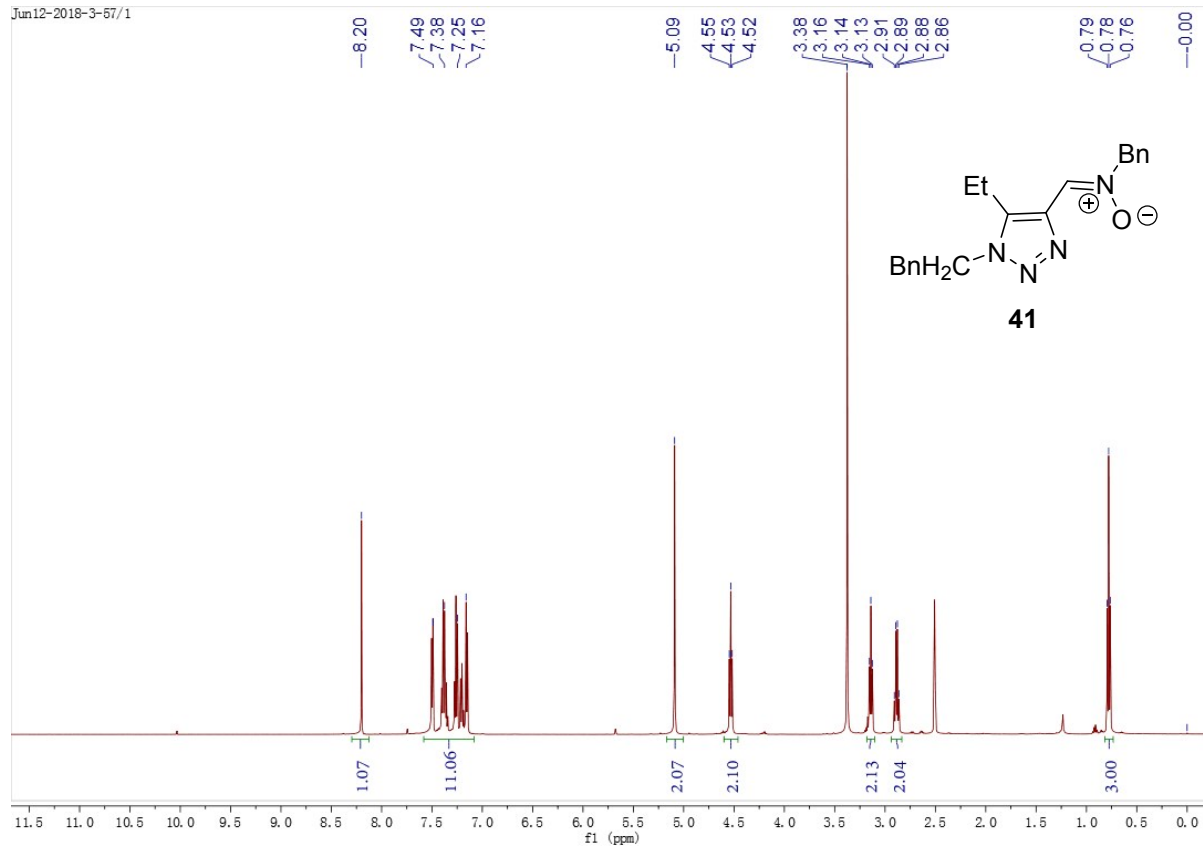

Jun12-2018-3-57cmr/2

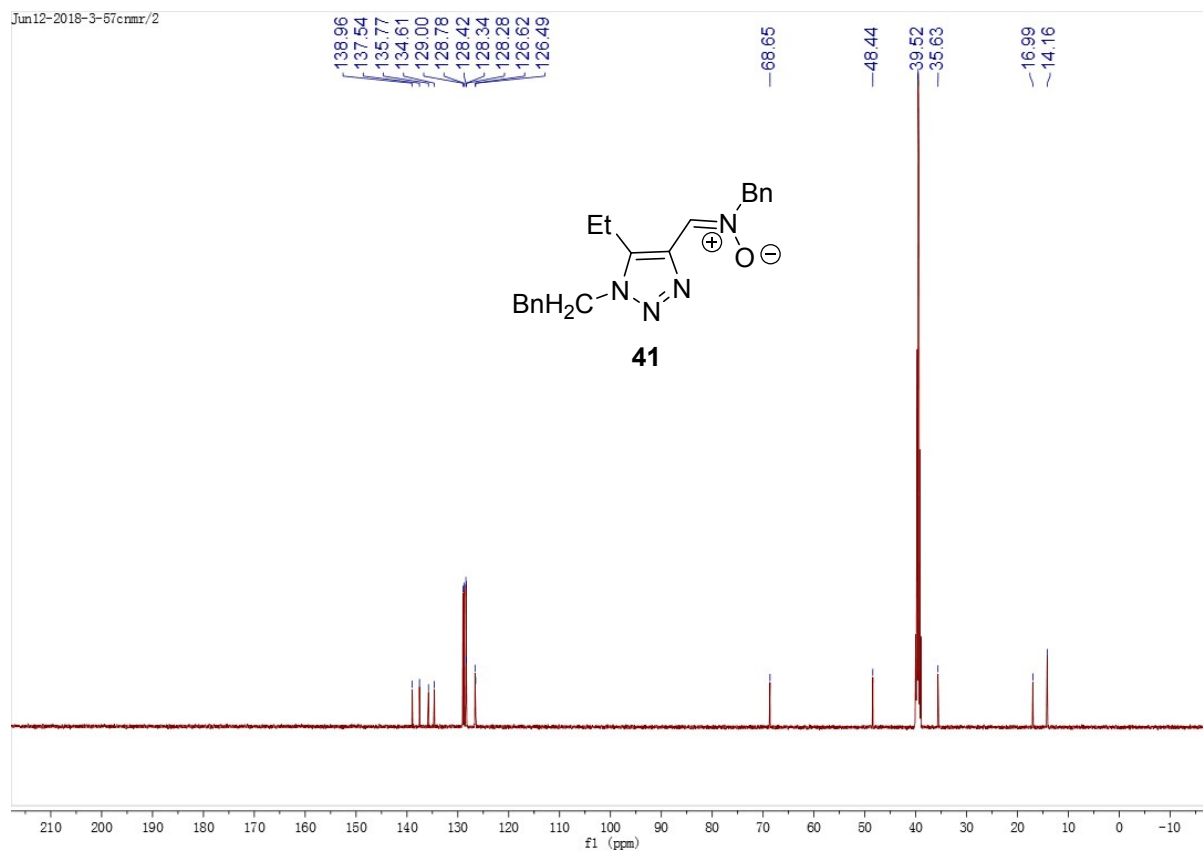

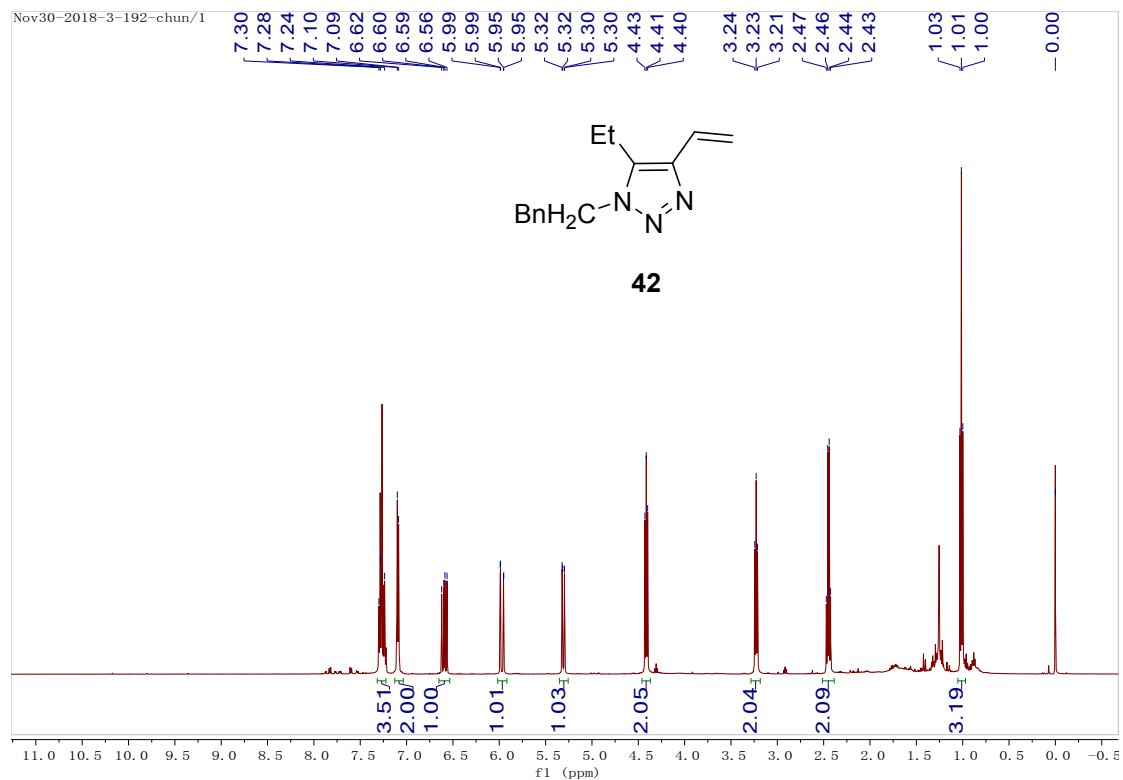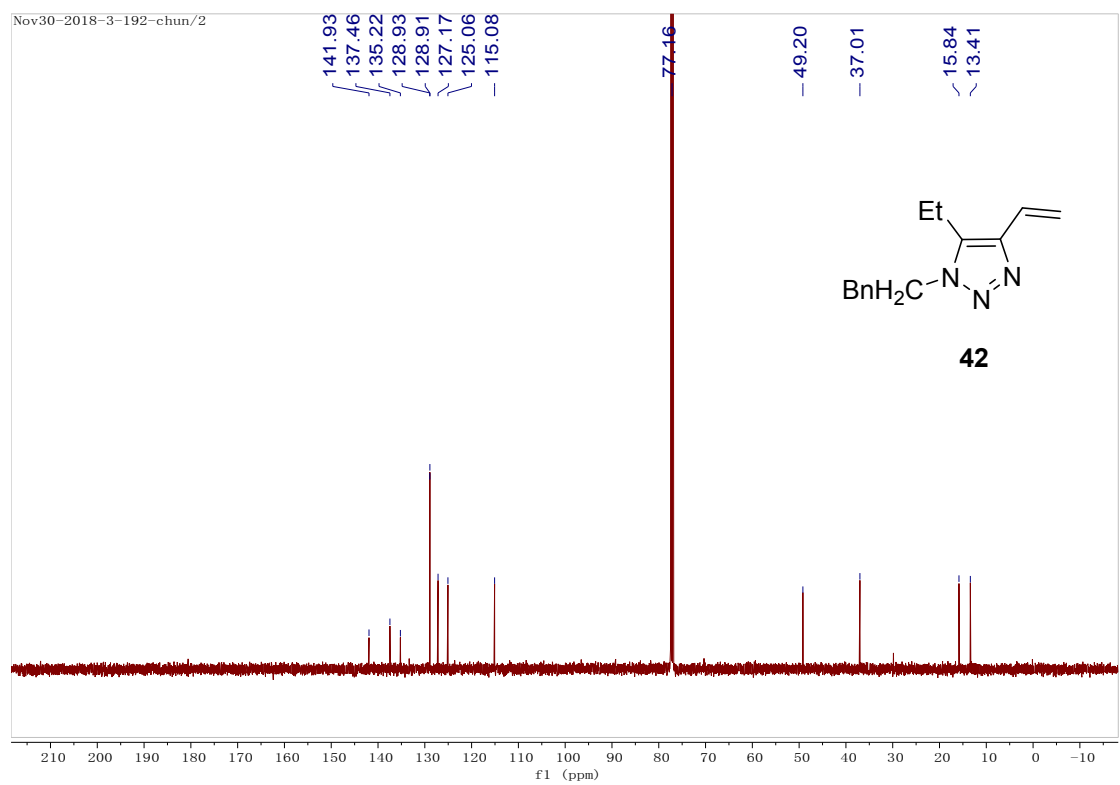

Supplement: c9gc01129c1.pdf [file c9gc01129c1.pdf]
